# Supplementary material for: Novel diagnostic biomarkers related to necroptosis and immune infiltration landscape in acute myocardial infarction
Source: PeerJ journal article supplement (doi:10.7717/peerj.17044), 2024-02-26
Supplement: DEG_GSE61144.xlsx [file DEG_GSE61144.xlsx]

## Sheet: DEG
id	logFC	AveExpr	t	P.Value	adj.P.Val	B	anno
4150224	2.70017	10.3187	8.01869	1.55778e-07	1.55284e-05	7.61189	MMP9
6860754	2.23048	8.37171	6.44421	3.45019e-06	0.000145563	4.54855	ARG1
1500328	2.2022	8.82431	11.0245	1.00661e-09	6.44856e-07	12.5163	IL18R1
6100176	2.1755	10.1199	11.5366	4.71007e-10	4.25393e-07	13.2411	IL1R2
4640647	2.05889	8.80219	5.14595	5.65052e-05	0.00130444	1.77615	ORM1
5310369	-2.03925	9.83846	-9.35001	1.46339e-08	3.55558e-06	9.92961	GZMK
2640609	1.9648	9.89657	3.13678	0.00540462	0.0549227	-2.6838	S100P
5310653	1.95427	11.5833	10.3298	2.94363e-09	1.33941e-06	11.4849	PADI4
4070129	1.88735	9.73723	7.70241	2.82579e-07	2.35581e-05	7.02483	PGLYRP1
6370367	-1.8842	10.6125	-8.86016	3.40432e-08	5.75759e-06	9.1051	GZMA
6330010	1.87603	9.42193	7.80156	2.34123e-07	2.06344e-05	7.21039	MCEMP1
650543	1.86762	9.70252	14.3258	1.1348e-11	1.105e-07	16.7215	FKBP5
4880717	1.84823	9.41206	4.17081	0.000513527	0.00778153	-0.400398	ACSL1
4850128	-1.7906	11.1862	-6.01327	8.53252e-06	0.000292757	3.65039	GZMH
3310181	-1.76379	11.2563	-6.50968	3.01316e-06	0.000131808	4.68285	NKG7
6560136	1.75893	7.8919	8.29495	9.36037e-08	1.09067e-05	8.11304	TPST1
240608	1.74358	10.3325	7.59087	3.49734e-07	2.70708e-05	6.81438	MME
3990328	1.71505	8.26802	9.49541	1.14538e-08	3.09922e-06	10.1682	CLEC4D
3990296	1.6674	9.38005	8.66456	4.80894e-08	7.31665e-06	8.76678	CA4
6980095	1.63262	9.01781	10.0577	4.54461e-09	1.75339e-06	11.0652	IRS2
6760075	-1.62435	9.61427	-8.25845	1.00062e-07	1.14092e-05	8.04745	EOMES
3140382	1.60676	8.292	5.1168	6.02971e-05	0.0013741	1.71185	VNN1
6400736	1.58466	9.67218	5.15973	5.47991e-05	0.00127449	1.80651	CAMP
3190326	1.58006	8.03124	9.48496	1.16563e-08	3.09922e-06	10.1511	PFKFB2
7330110	1.57037	8.18098	11.8191	3.13193e-10	3.47932e-07	13.6287	GPR97
7650554	1.55287	10.0947	7.69899	2.84426e-07	2.35909e-05	7.01841	DYSF
2320239	1.53841	8.36188	7.40313	5.02608e-07	3.51339e-05	6.45615	KLHL2
4260241	1.52676	9.5445	8.75955	4.06381e-08	6.46585e-06	8.93174	LRG1
2370524	1.52484	9.55406	5.33247	3.73667e-05	0.000928674	2.18577	TNFAIP6
540193	1.52476	11.6219	6.74906	1.84526e-06	8.9661e-05	5.16893	MMP25
4780672	1.51558	10.5426	8.34612	8.52696e-08	1.03708e-05	8.20468	QPCT
7380615	-1.50963	10.9355	-5.69238	1.70013e-05	0.00049804	2.9665	CLC
5130475	1.49521	10.5522	5.35221	3.57746e-05	0.000895368	2.22892	IL18RAP
650164	1.4843	10.3054	7.66898	3.01171e-07	2.44793e-05	6.96195	CYP4F3
3370605	1.4764	8.01645	10.0509	4.59532e-09	1.75339e-06	11.0545	SIPA1L2
1010168	1.46372	10.15	11.2132	7.58609e-10	5.27635e-07	12.7868	SMAP1L
1780270	1.44431	8.62617	2.09412	0.0498158	0.302165	-4.74762	EIF1AY
1980021	1.44141	9.76367	5.05139	6.97756e-05	0.00154487	1.56735	USP10
1090427	1.43863	8.84295	2.47951	0.0226426	0.171154	-4.0316	LOC653600
7160097	1.43368	8.05789	8.42444	7.39759e-08	9.59976e-06	8.34425	MGAM
2640044	1.41114	12.9194	7.54292	3.83495e-07	2.89691e-05	6.72338	BASP1
1430762	1.39509	8.77579	10.2669	3.25204e-09	1.41368e-06	11.3887	IRAK3
3310091	1.39089	10.2796	2.02899	0.056629	0.329088	-4.86148	DEFA3
4390242	1.38534	10.5867	2.0657	0.0526924	0.314237	-4.79759	DEFA1
3460674	1.37996	9.26125	10.9342	1.15383e-09	6.80777e-07	12.3856	SRPK1
6060390	1.37576	9.82953	8.24223	1.0308e-07	1.16155e-05	8.01823	CDA
2810373	1.36904	9.96228	10.1532	3.89848e-09	1.63625e-06	11.2136	VNN3
7160450	-1.36764	9.11219	-8.5476	5.92592e-08	8.2198e-06	8.56197	KLRG1
6770564	1.36493	12.5493	8.94053	2.95795e-08	5.16177e-06	9.2426	AQP9
6510553	-1.36285	9.69075	-5.99902	8.79542e-06	0.000299876	3.62029	CD8A
1170307	-1.35905	9.78184	-7.93607	1.81765e-07	1.74314e-05	7.45991	IL2RB
4180092	1.35391	12.1874	9.48208	1.17127e-08	3.09922e-06	10.1464	CEBPD
6290561	-1.35315	10.0288	-5.57857	2.17745e-05	0.000605099	2.7211	HLA-DQA1
4610113	1.35272	10.4554	4.70003	0.000153828	0.00292899	0.786	PYGL
2750739	1.3509	11.6273	8.82866	3.59789e-08	5.99899e-06	9.05097	SLC11A1
3390458	1.3404	8.44466	7.3826	5.23087e-07	3.59081e-05	6.41668	KCNJ15
4060408	-1.33954	9.70723	-4.15605	0.000531169	0.00799661	-0.433525	KSP37
2510095	-1.33933	10.9807	-6.4826	3.18659e-06	0.000137662	4.62736	RUNX3
610563	1.33694	8.78825	10.4515	2.43002e-09	1.15756e-06	11.6698	HMGB2
7210438	1.32511	10.5983	9.89429	5.92332e-09	2.02749e-06	10.8086	PFKFB4
10279	1.32441	8.25713	4.54238	0.000219965	0.00393068	0.433275	S100A12
3800243	1.32142	11.0725	5.02442	7.41145e-05	0.00162217	1.50766	PBEF1
4180411	1.32102	13.2039	12.1925	1.84748e-10	2.90156e-07	14.1279	ALOX5AP
5860300	1.32022	9.56453	2.62805	0.0165135	0.134133	-3.73891	HSPA1A
6370315	1.31559	8.20943	9.29757	1.59958e-08	3.72625e-06	9.84288	TREM1
5490273	-1.31212	11.436	-8.42054	7.44996e-08	9.59976e-06	8.33732	CD81
3180082	1.30326	7.25798	3.35766	0.00328712	0.0362559	-2.20673	BTNL3
50563	1.30095	11.4536	7.4993	4.17151e-07	3.10074e-05	6.64029	BCL6
6980092	1.29197	9.6661	7.91246	1.89992e-07	1.78919e-05	7.41629	RNF24
630364	1.28746	8.85324	6.14604	6.43901e-06	0.000236601	3.92967	PANX2
2710577	1.28497	10.4807	7.26084	6.63693e-07	4.22395e-05	6.1813	NCF4
6100228	1.28324	9.00135	6.47951	3.20699e-06	0.000138298	4.62103	NFIL3
4050438	1.27471	9.5261	9.22388	1.81369e-08	4.05144e-06	9.72037	HCG27
4390692	-1.26221	8.66321	-1.33931	0.196188	0.643771	-5.90609	HLA-DRB5
2230601	1.25988	10.9351	2.20319	0.0400515	0.261638	-4.55203	FOLR3
6590553	1.25697	9.4139	8.10581	1.32519e-07	1.36984e-05	7.7711	CPD
6060224	1.25616	10.4911	8.63155	5.10003e-08	7.50707e-06	8.70917	CRISPLD2
6840243	1.25496	9.11064	10.105	4.21169e-09	1.68422e-06	11.1388	REPS2
5080300	1.25369	11.6659	5.71806	1.60813e-05	0.000477118	3.02168	CMTM2
2510754	1.25283	8.4328	6.22509	5.45119e-06	0.00020767	4.09488	ABHD5
4220026	1.2504	9.39139	6.70134	2.03351e-06	9.64027e-05	5.07266	CREB5
4390615	1.24613	8.66179	8.81643	3.67609e-08	6.06705e-06	9.02992	TLR4
3780243	1.24015	8.72295	7.28566	6.32153e-07	4.10368e-05	6.22945	IFRD1
4850192	-1.23285	10.2326	-8.44885	7.07833e-08	9.25535e-06	8.38756	CD6
3890095	-1.22833	10.4291	-8.5335	6.07766e-08	8.33697e-06	8.53716	LFNG
940397	1.22386	12.1785	9.10403	2.22789e-08	4.42732e-06	9.5196	IGF2R
6980070	1.22043	9.21185	9.875	6.11264e-09	2.05246e-06	10.7781	B4GALT5
1660026	1.21649	8.93509	9.05142	2.43976e-08	4.62196e-06	9.43086	PRKDC
6270382	1.21516	8.33561	9.15507	2.04058e-08	4.28685e-06	9.60534	NTNG2
3290192	1.21408	10.1633	7.8536	2.1222e-07	1.92768e-05	7.30724	STX3A
6980164	1.21178	12.357	4.15858	0.000528093	0.00796014	-0.427829	ALPL
2070341	1.2086	7.81077	10.455	2.4168e-09	1.15756e-06	11.675	LOC643313
4480435	-1.20682	10.3848	-4.70651	0.000151592	0.00290067	0.800454	PRF1
2320296	1.20438	8.28897	5.71666	1.61303e-05	0.000478279	3.01867	MAP3K2
5560446	-1.20283	9.64006	-4.31141	0.000372361	0.00596157	-0.0847997	GPR56
7550398	-1.19985	7.85026	-6.9526	1.22348e-06	6.50301e-05	5.57599	CD160
2100520	1.1933	10.3685	9.59882	9.63671e-09	2.74761e-06	10.3362	LENG4
1110215	-1.1925	10.4631	-10.1241	4.08485e-09	1.65733e-06	11.1684	FAM62A
10025	1.19204	10.1397	5.3359	3.70856e-05	0.000922632	2.19325	CD55
5690500	1.19185	11.5069	4.15774	0.000529111	0.00797078	-0.429719	RGS2
3130273	1.18969	9.5281	10.2771	3.19965e-09	1.40344e-06	11.4044	GAB2
2900463	-1.1895	11.3222	-5.38106	3.35702e-05	0.000847735	2.29194	GNLY
1740291	1.18824	10.7258	9.01331	2.60625e-08	4.77032e-06	9.36635	SLA
5260438	1.18736	11.1606	8.46414	6.88566e-08	9.10985e-06	8.41466	FLJ22662
1980082	1.18669	8.88108	5.31374	3.89453e-05	0.000963479	2.14477	MOSC1
7000634	1.18635	7.97299	9.46007	1.21539e-08	3.14755e-06	10.1104	MANSC1
10343	1.17785	13.3795	10.1535	3.89659e-09	1.63625e-06	11.214	FPR1
3140114	1.17586	9.69328	5.50391	2.56327e-05	0.000682702	2.55935	FPRL1
3440754	1.17444	8.13686	5.508	2.54042e-05	0.000677534	2.56823	TGM3
5860750	1.17426	9.13605	6.56254	2.70214e-06	0.000121253	4.79087	ORF1-FL49
380543	1.16925	8.81077	5.64849	1.87003e-05	0.000538417	2.87203	CHSY1
6220204	1.16903	7.41845	7.02911	1.04988e-06	5.82955e-05	5.7275	ECHDC3
3940433	1.16659	8.27539	9.80754	6.82597e-09	2.23044e-06	10.6711	F5
4590646	-1.16469	8.81745	-9.0892	2.2856e-08	4.48706e-06	9.49462	FCRL3
2140497	1.161	12.0653	4.29722	0.000384629	0.00612576	-0.116655	PROK2
4780767	1.15903	11.2744	10.7515	1.52527e-09	8.16054e-07	12.1178	XPO6
2060347	-1.14901	11.5265	-6.64867	2.26446e-06	0.000105	4.96604	EVL
2030739	-1.14893	8.76913	-6.41843	3.63976e-06	0.000150945	4.4955	TGFBR3
4480093	1.14862	10.9802	7.66406	3.04015e-07	2.45466e-05	6.95268	S100A11
1470711	-1.14826	11.5586	-6.61553	2.4235e-06	0.000110688	4.89876	CD3Z
2260239	1.14708	11.26	7.03205	1.04376e-06	5.82768e-05	5.73329	MXD1
3610634	1.14539	9.72954	8.78135	3.91041e-08	6.32512e-06	8.96942	C20orf3
3400328	-1.14127	8.75695	-6.76514	1.78595e-06	8.80976e-05	5.2013	ADA
7610546	1.13815	9.19263	8.45554	6.99334e-08	9.17748e-06	8.39942	HMFN0839
5560451	1.13796	7.24715	9.76412	7.33063e-09	2.31757e-06	10.6019	BMX
990671	-1.13707	9.97407	-6.91132	1.3292e-06	6.92523e-05	5.49391	UCP2
1050240	1.13429	8.29737	9.32188	1.53487e-08	3.61006e-06	9.88313	ROPN1L
1190241	-1.13311	10.1464	-8.71509	4.39632e-08	6.81668e-06	8.8547	CD2
3840102	1.13257	7.95473	9.32195	1.53469e-08	3.61006e-06	9.88324	LOC441268
60397	-1.13143	11.7341	-9.49905	1.13842e-08	3.09922e-06	10.1741	AHNAK
4560475	1.12829	10.7784	8.56172	5.77775e-08	8.08338e-06	8.58681	IL8RA
6770348	1.12722	8.86109	8.22343	1.06696e-07	1.1833e-05	7.98433	CKAP4
2940022	-1.11692	9.70676	-2.31411	0.0319476	0.221888	-4.34719	LY6E
1990446	-1.11241	9.88123	-7.2241	7.13398e-07	4.41898e-05	6.10986	CCL5
5390719	-1.11166	10.8098	-8.64885	4.9452e-08	7.43372e-06	8.73939	LOC644037
7570450	1.11143	8.93944	10.7696	1.48337e-09	8.16054e-07	12.1446	VMD2
1260301	1.10977	10.682	5.92166	1.03753e-05	0.000338795	3.4564	ZNF467
3180735	1.10963	7.94732	11.5499	4.61983e-10	4.25393e-07	13.2596	PHC2
3940184	1.10883	12.2412	9.43785	1.26166e-08	3.18272e-06	10.0741	LILRB3
3520338	1.10523	9.74734	5.59183	2.11538e-05	0.000590887	2.74978	CSF3R
3990626	-1.10243	10.9051	-9.48659	1.16245e-08	3.09922e-06	10.1538	IL7R
3440253	1.1003	9.63558	7.97585	1.68734e-07	1.65628e-05	7.5332	Rgr
3800253	-1.09447	10.5432	-9.16548	2.00444e-08	4.27519e-06	9.62279	LOC387841
4810605	1.09245	8.52467	8.54169	5.989e-08	8.28371e-06	8.55158	ST6GALNAC2
3180133	1.09143	12.7593	8.08908	1.36687e-07	1.40695e-05	7.74062	SEPX1
10754	1.09112	8.33808	13.6437	2.66266e-11	1.29637e-07	15.9373	PREX1
5670424	1.08875	10.4208	6.89027	1.38672e-06	7.1369e-05	5.45196	ABTB1
1050528	1.08806	9.23979	6.05208	7.85676e-06	0.000276141	3.73225	CARD15
5720458	-1.08791	10.2147	-5.83432	1.25133e-05	0.000390286	3.27052	RARRES3
5910730	1.08725	8.48612	7.25829	6.67017e-07	4.23404e-05	6.17636	MGC39518
7320274	1.08652	9.54039	7.29996	6.14682e-07	4.02787e-05	6.25716	NALP12
4810131	1.08593	9.37542	7.23309	7.00888e-07	4.35812e-05	6.12737	RBP7
1500403	1.08419	10.2096	9.24654	1.74484e-08	4.00713e-06	9.75811	PCNX
940754	1.08223	7.43747	11.2853	6.81491e-10	5.10458e-07	12.8891	CLEC4E
6900465	1.0786	12.9526	9.34933	1.46507e-08	3.55558e-06	9.92849	ALOX5
6480500	-1.07643	10.8361	-7.5444	3.82403e-07	2.89691e-05	6.7262	HLA-DPA1
5050653	1.07617	7.58609	10.0489	4.60973e-09	1.75339e-06	11.0515	FBXL13
5570673	1.07543	12.3923	8.48641	6.61476e-08	8.86664e-06	8.45406	VNN2
5910037	1.07337	8.4436	5.91739	1.04705e-05	0.000341048	3.44734	IBRDC2
3420630	-1.07294	9.89601	-9.41305	1.3155e-08	3.28442e-06	10.0334	MAP4K1
6220672	1.07284	10.911	7.41324	4.92828e-07	3.487e-05	6.47557	ERGIC1
1240546	-1.07028	10.9243	-7.07722	9.53959e-07	5.4706e-05	5.82234	RALGDS
3990259	-1.06963	7.81755	-7.05964	9.87923e-07	5.60595e-05	5.78771	PPP2R2B
360491	1.06812	8.52352	7.31682	5.94727e-07	3.92351e-05	6.28979	KIAA0404
1450523	1.0664	8.50963	3.02555	0.00692635	0.0670497	-2.92033	LRRK2
2350056	-1.06568	11.0947	-12.883	7.19084e-11	1.8688e-07	15.0139	LOC648249
5570309	1.06373	8.3779	4.36077	0.000332677	0.00545171	0.0259896	ACSL4
3870110	1.06237	8.87267	7.01072	1.08913e-06	5.95137e-05	5.69116	IL17R
610408	1.0623	9.7831	5.34178	3.66067e-05	0.000913986	2.20613	PPP4R1
5390136	-1.06222	9.68128	-13.1336	5.15712e-11	1.8682e-07	15.324	HSPE1
270437	1.06198	9.36536	9.92997	5.589e-09	1.98114e-06	10.8649	DENND3
1170400	-1.05542	9.94732	-10.6528	1.77598e-09	9.14911e-07	11.9716	C12orf57
2360609	1.05311	8.66053	4.34129	0.000347807	0.00565567	-0.0177439	KIAA1324
5820348	1.05122	7.97164	4.74852	0.000137851	0.00268892	0.894262	OPLAH
3390167	-1.05118	10.382	-5.12153	5.96644e-05	0.00136443	1.72229	CRIP1
5720291	1.04887	7.62071	4.17961	0.000503292	0.00765026	-0.380651	LOC642342
5910598	1.04825	10.2301	5.46281	2.80487e-05	0.000738165	2.47006	SORL1
1470554	1.04683	8.0388	2.55573	0.0192707	0.150914	-3.88245	ELA2
4780475	1.04415	11.9812	5.40829	3.16175e-05	0.000808489	2.35134	DUSP1
990132	1.04393	9.29452	5.90437	1.07666e-05	0.000348997	3.41967	FUT7
7650689	1.04303	9.34572	7.65799	3.07557e-07	2.47504e-05	6.94125	ZDHHC18
5560577	1.04263	9.04521	7.41584	4.90345e-07	3.48009e-05	6.48056	TMPIT
6400397	-1.0422	8.86353	-9.83972	6.4755e-09	2.1594e-06	10.7222	SH2D1A
270341	-1.04204	11.1681	-7.02003	1.06908e-06	5.88491e-05	5.70956	SPOCK2
830026	-1.03933	9.27702	-14.8796	5.8197e-12	1.105e-07	17.3297	LOC389674
6900348	-1.03751	8.45321	-6.91105	1.32994e-06	6.92523e-05	5.49336	SBK1
6290274	-1.03744	11.6147	-7.50563	4.1208e-07	3.07243e-05	6.65238	RPS4X
460630	1.03723	9.17213	7.0843	9.40632e-07	5.43257e-05	5.83627	MKNK1
460754	-1.03671	9.88099	-9.8247	6.63666e-09	2.19809e-06	10.6984	CDC25B
2480600	1.03669	8.83173	6.83472	1.55115e-06	7.80983e-05	5.34095	SYTL3
1170475	1.03597	8.40101	7.41372	4.9236e-07	3.487e-05	6.47651	ENTPD1
4920092	1.03589	12.7338	5.99456	8.8795e-06	0.000301897	3.61085	SLC2A3
5820711	1.03469	8.38136	9.74903	7.51502e-09	2.35383e-06	10.5778	TREML2
3840441	1.03268	7.87002	11.4031	5.72693e-10	4.64711e-07	13.055	SLC9A8
830400	1.03185	12.8534	6.69232	2.07124e-06	9.80006e-05	5.05444	S100A9
4210100	1.03122	9.11996	8.9948	2.69136e-08	4.83522e-06	9.33494	MSL3L1
7000133	-1.02982	9.57008	-9.00012	2.66663e-08	4.83522e-06	9.34397	BCL11B
4490026	-1.02728	12.3768	-10.0438	4.64764e-09	1.75411e-06	11.0436	RPL35
3130541	-1.02582	11.5974	-14.3516	1.09951e-11	1.105e-07	16.7504	LOC440737
2650152	1.02503	7.56016	8.68405	4.64521e-08	7.13467e-06	8.80073	TMCC3
4860603	1.02312	10.1307	7.25744	6.68136e-07	4.23553e-05	6.1747	CXCL16
7330148	1.02277	10.9839	7.0159	1.07792e-06	5.90336e-05	5.7014	GALNAC4S-6ST
5220259	-1.02223	8.02259	-5.8891	1.11247e-05	0.000357039	3.38721	TARP
1450390	-1.02219	8.9298	-6.04973	7.89613e-06	0.000276141	3.72729	KLRB1
7200187	-1.02165	9.68005	-6.71902	1.96153e-06	9.35366e-05	5.10838	FAM113B
770484	1.02093	7.72748	9.98648	5.09924e-09	1.88081e-06	10.9538	CDK5R1
4610433	1.02051	10.3748	6.98805	1.13962e-06	6.15561e-05	5.6463	TSEN34
7570634	1.01671	8.73526	8.12316	1.28335e-07	1.34083e-05	7.80267	KIAA0963
2710437	1.01639	11.9842	5.87949	1.13564e-05	0.000363271	3.36676	IL8RB
10204	1.01597	8.79697	8.74832	4.14527e-08	6.57397e-06	8.9123	ATG16L2
730632	1.01555	8.46346	5.76374	1.45691e-05	0.000440301	3.11964	C13orf18
870349	1.01543	7.88959	8.4203	7.45314e-08	9.59976e-06	8.3369	LOC284757
6290128	1.01063	8.86284	5.90703	1.07053e-05	0.000347704	3.42534	SLC45A4
6940068	-1.00673	10.3837	-7.31524	5.96578e-07	3.93039e-05	6.28672	BOLA2
6480543	-0.999876	8.65163	-5.71583	1.6159e-05	0.00047884	3.0169	KLRK1
3140274	0.999852	7.97984	13.0504	5.75575e-11	1.8682e-07	15.2217	LPPR2
60681	0.99847	8.22203	9.62788	9.18218e-09	2.69309e-06	10.3832	FLJ38964
2710253	-0.99846	9.87798	-8.15007	1.22113e-07	1.31217e-05	7.85157	FAM38A
5890471	-0.997651	8.36	-4.37692	0.000320644	0.00530452	0.0622224	NCR3
2260133	0.997203	8.64187	6.72903	1.92197e-06	9.27401e-05	5.12857	GK
2710424	-0.995382	8.76779	-6.60194	2.49203e-06	0.000113492	4.87112	PLEKHF1
3450561	-0.994874	8.07312	-5.82873	1.26649e-05	0.000393752	3.25858	GZMM
3140541	0.992051	7.3123	9.87556	6.10701e-09	2.05246e-06	10.779	HECW2
7560370	0.991817	10.1915	9.44667	1.24308e-08	3.15218e-06	10.0885	EDG4
6940113	0.990313	9.53335	8.63981	5.02546e-08	7.47766e-06	8.72361	ZNF281
3190400	0.989832	13.126	7.14579	8.32634e-07	4.93769e-05	5.95696	CEBPB
290646	-0.987292	10.6208	-7.19575	7.54391e-07	4.5854e-05	6.0546	RPL13
150632	0.983552	8.75645	4.55998	0.000211343	0.00380394	0.472686	SAMSN1
2340048	0.983091	9.13992	5.02271	7.43979e-05	0.00162431	1.50388	LOC349114
4260379	-0.98272	10.5131	-8.1446	1.23352e-07	1.31702e-05	7.84164	STMN3
2190373	0.982364	7.77765	10.303	3.07103e-09	1.37173e-06	11.444	EXTL3
3520035	0.982259	8.26262	5.51879	2.48115e-05	0.000665395	2.59164	MGC23280
2490440	0.981419	10.7666	9.68489	8.35424e-09	2.51076e-06	10.475	RALB
2030136	0.980373	9.69045	9.20378	1.87711e-08	4.12743e-06	9.68683	MAST3
7560138	0.980158	9.30205	5.58088	2.16649e-05	0.000602399	2.7261	SLC16A3
4010048	0.978275	8.78566	5.9486	9.79446e-06	0.000325726	3.51355	ACOX1
1030754	0.977816	8.09842	6.08949	7.25729e-06	0.000260764	3.81099	EMR3
1300056	-0.975364	10.7744	-7.7375	2.6434e-07	2.24999e-05	7.09066	NDUFB2
6450373	0.974567	11.7795	9.27629	1.65856e-08	3.84526e-06	9.80757	CFLAR
620040	-0.972964	10.1125	-7.90398	1.93036e-07	1.81435e-05	7.40063	TNFRSF25
580356	0.972956	8.29335	6.7955	1.6793e-06	8.35139e-05	5.26231	CEACAM3
150202	-0.97253	7.94446	-5.89815	1.0911e-05	0.000352037	3.40646	GPR114
4850474	-0.971846	9.29638	-8.38614	7.92898e-08	9.87194e-06	8.27612	MS4A7
5490612	0.970949	9.79959	6.1418	6.49703e-06	0.000237995	3.92077	PISD
2100035	0.96997	8.85909	7.3286	5.81193e-07	3.88689e-05	6.31255	STK17B
1820692	-0.968432	11.3278	-12.508	1.19431e-10	2.52814e-07	14.5385	LOC387867
1260008	0.966189	7.38036	11.2278	7.42263e-10	5.27635e-07	12.8076	TLR2
3140474	0.964838	7.80675	5.25764	4.40918e-05	0.00106536	2.02181	GPR177
6040521	0.964353	8.98694	3.12321	0.00557117	0.0562046	-2.71279	TIMP2
270040	0.964308	7.2066	7.39265	5.12957e-07	3.55759e-05	6.43601	B3GNTL1
5050075	0.963673	9.96647	2.03039	0.0564744	0.328621	-4.85906	FTHL12
2510563	0.962984	8.05496	9.3436	1.47937e-08	3.55558e-06	9.91902	KIAA0319L
5860020	0.961501	8.45948	7.38133	5.24383e-07	3.59081e-05	6.41423	CAMKK2
2680682	0.961196	8.7401	10.4363	2.48869e-09	1.16115e-06	11.6468	PDLIM7
1780672	0.959374	9.74796	7.41672	4.89502e-07	3.47918e-05	6.48227	PELI1
7320162	0.959039	7.69239	4.73009	0.000143716	0.00278215	0.853119	OSM
620767	0.959035	9.25085	8.12704	1.27417e-07	1.33697e-05	7.80973	NBEAL2
6040296	0.958172	8.07303	6.41665	3.65324e-06	0.000151246	4.49184	ZBTB16
5270433	-0.957215	11.7762	-6.10848	6.97128e-06	0.000251975	3.85088	VAMP8
1340066	0.956746	9.89556	7.86044	2.09504e-07	1.91208e-05	7.31994	MBD6
4490445	0.955028	7.98577	7.37593	5.29929e-07	3.60848e-05	6.40384	SIGLEC5
650541	0.954964	13.6475	12.6601	9.70744e-11	2.2506e-07	14.733	PRG1
6660181	0.952436	9.12469	7.61354	3.34857e-07	2.62532e-05	6.8573	MYO1F
6980474	0.952285	10.5818	6.43989	3.48123e-06	0.000146745	4.53967	LY96
7400136	-0.951736	11.2081	-5.96119	9.53448e-06	0.000319261	3.54024	HLA-DMA
4610541	0.951432	8.17459	9.37854	1.39441e-08	3.44618e-06	9.97664	FRAT1
130553	-0.951353	9.20763	-7.12066	8.75129e-07	5.13962e-05	5.9077	SCAP1
5690095	-0.950688	8.6134	-3.09808	0.00589305	0.0589148	-2.76641	LRAP
4560133	0.948589	7.45818	4.1216	0.000574735	0.00852334	-0.510805	ANXA3
1170438	0.948298	9.59724	6.65819	2.22077e-06	0.000103252	4.98535	MTHFS
1500717	0.94777	9.7665	9.46183	1.2118e-08	3.14755e-06	10.1133	PTEN
840253	-0.94761	9.762	-7.1471	8.3049e-07	4.93098e-05	5.95951	PLAC8
870400	0.947511	8.15443	4.33286	0.000354563	0.00574081	-0.0366583	NQO2
6770072	0.946294	8.56294	7.75216	2.57086e-07	2.20754e-05	7.11811	ZNF438
3120735	0.946021	9.70067	11.2567	7.1103e-10	5.16686e-07	12.8486	LTB4R
1340382	0.945938	7.72743	6.20841	5.64588e-06	0.000213251	4.06007	HSDL2
1940450	-0.945719	10.1683	-6.90395	1.34907e-06	6.99489e-05	5.47922	NME2
4780025	-0.945439	9.0928	-3.44444	0.0027002	0.0306913	-2.01706	FCER1A
5490376	-0.944953	10.0946	-9.93946	5.50341e-09	1.98114e-06	10.8799	C19orf37
4780722	0.942603	8.12723	7.11218	8.89978e-07	5.19549e-05	5.89105	TLE3
7050360	0.942299	10.3589	3.19848	0.00470641	0.0490561	-2.55146	NCF2
3520086	0.941727	7.70676	11.9658	2.5416e-10	3.20757e-07	13.8265	SLC6A6
1090170	0.940889	8.57451	6.05386	7.82712e-06	0.000275507	3.736	CLEC7A
2710044	0.940445	9.30215	5.65306	1.85153e-05	0.000534989	2.88189	TRIB1
1690050	-0.939637	8.38287	-6.49976	3.07551e-06	0.000133813	4.66254	SAMD3
4920243	0.938117	7.9737	9.01511	2.59816e-08	4.77032e-06	9.36939	BST1
6560274	-0.937853	10.27	-5.82305	1.28204e-05	0.000397572	3.24647	VIL2
3850452	0.937617	10.0592	11.391	5.8303e-10	4.65344e-07	13.038	KIAA1754
2490356	-0.937438	10.6249	-14.0417	1.61205e-11	1.12123e-07	16.3997	LOC127295
990097	0.935078	7.23911	3.91485	0.000922715	0.0125277	-0.973971	CEACAM8
2630154	0.934345	10.1706	5.82266	1.28314e-05	0.000397659	3.24562	GABARAPL1
4250379	0.933917	9.75194	2.95458	0.00810609	0.076028	-3.06971	FOS
4290066	0.933792	10.6015	7.10332	9.05753e-07	5.27493e-05	5.87366	SPI1
870196	-0.930506	11.1703	-11.8164	3.14438e-10	3.47932e-07	13.6249	LOC652624
2370332	-0.930266	10.6448	-7.03732	1.03284e-06	5.7933e-05	5.7437	LOC650954
7000044	-0.929437	12.3053	-12.9759	6.35346e-11	1.8688e-07	15.1295	LOC645161
5900072	0.928753	8.82916	2.80586	0.0112391	0.0988475	-3.37849	LOC347376
2690609	-0.928739	10.4262	-7.24026	6.91075e-07	4.31638e-05	6.14131	CUTA
2760438	-0.928436	12.2591	-11.8236	3.11212e-10	3.47932e-07	13.6347	LOC441246
2680370	-0.928191	11.3984	-8.16548	1.18693e-07	1.28704e-05	7.87952	HLA-DRA
1690528	0.927722	10.1031	5.79757	1.35437e-05	0.000415239	3.19203	KIAA0446
6290358	0.926891	7.83221	9.62218	9.26961e-09	2.70245e-06	10.374	FLJ25084
1190349	0.926521	10.0369	4.27342	0.000406128	0.00641038	-0.17009	EIF2AK2
2750528	0.925769	11.6133	6.62663	2.36901e-06	0.000108811	4.9213	C1orf24
5670133	0.924647	9.86282	5.418	3.09495e-05	0.000796005	2.37251	NRBF2
5050398	-0.923386	12.1928	-7.60128	3.42819e-07	2.66627e-05	6.8341	RPL36
7400592	0.923228	7.16427	4.98436	8.10698e-05	0.00174339	1.41892	LOC654053
2760092	-0.922	10.0337	-8.29871	9.29623e-08	1.09062e-05	8.1198	FAIM3
4250017	0.921581	10.1464	7.63722	3.20017e-07	2.54171e-05	6.90204	MSRB2
4010358	0.918692	8.93889	9.18185	1.94895e-08	4.19861e-06	9.65018	TMEM49
6040379	-0.918364	10.029	-4.41805	0.000291934	0.00491983	0.154515	HLA-DRB4
2690053	0.918361	11.827	5.69773	1.6805e-05	0.000493181	2.97802	FRAT2
6220450	0.916966	10.3966	4.18372	0.000498575	0.00759516	-0.371414	DHRS9
4200180	-0.916861	9.8015	-6.30308	4.62895e-06	0.000181311	4.25706	AES
5870326	-0.916636	11.9059	-8.21556	1.08248e-07	1.19237e-05	7.97012	LOC341457
5050088	-0.916137	11.3793	-6.25624	5.10608e-06	0.000197409	4.15975	CSF1R
3850341	0.915764	8.00993	9.04702	2.45839e-08	4.63921e-06	9.42343	LOC653157
7150612	-0.913604	9.80251	-5.53999	2.36875e-05	0.000640709	2.6376	C9orf142
4230133	-0.913464	9.05233	-8.12906	1.26943e-07	1.33487e-05	7.8134	EBI2
5670435	0.912812	8.51226	13.3065	4.11249e-11	1.66854e-07	15.5345	P2RX1
5560328	-0.912326	11.2126	-6.5506	2.76941e-06	0.000123475	4.76649	PRDX1
6040639	0.912132	8.50784	3.90541	0.000942875	0.0127622	-0.995075	AIM2
6020575	0.912005	8.37028	8.48992	6.57308e-08	8.84043e-06	8.46026	DIRC2
6480243	-0.91191	8.2944	-5.13769	5.75543e-05	0.00132356	1.75794	CD3G
4570377	0.911215	8.53476	5.2931	4.07637e-05	0.00100084	2.09956	ABCG1
2710397	0.909899	7.96717	11.5037	4.94149e-10	4.25393e-07	13.1955	SLC22A4
7330767	0.908382	9.07154	4.20706	0.000472654	0.00726326	-0.319027	VASP
450114	-0.90835	10.8792	-8.62622	5.14873e-08	7.50707e-06	8.69985	GIMAP7
3140039	0.907181	8.52968	4.20911	0.000470448	0.00723907	-0.314436	CYB5R4
1340170	-0.906946	9.40556	-9.143	2.08334e-08	4.28685e-06	9.5851	RAFTLIN
6180059	-0.906901	8.73013	-3.92062	0.000910601	0.0123874	-0.961065	CCL4L1
4570612	0.906793	8.17185	8.14536	1.23179e-07	1.31702e-05	7.84302	MAN2A2
1260746	0.90575	9.71221	5.06638	6.74768e-05	0.00150286	1.6005	KCNJ2
2690187	0.904636	8.09918	6.72162	1.95119e-06	9.35017e-05	5.11361	LOC201175
4060066	-0.903288	11.1762	-3.84097	0.00109275	0.0144651	-1.13901	ITGA2B
630711	-0.90137	12.2115	-8.77116	3.98136e-08	6.41855e-06	8.95181	RPLP0
1010754	0.901297	8.20626	9.1061	2.21994e-08	4.42732e-06	9.52309	KLHL8
6650020	0.900958	10.5261	3.78538	0.00124096	0.0160645	-1.26296	ADM
940348	0.900806	11.9487	5.65359	1.84942e-05	0.000534757	2.88302	GCA
7330129	-0.900449	10.9186	-8.2637	9.91064e-08	1.13534e-05	8.05689	HINT1
1170671	-0.899328	9.70794	-6.94458	1.24332e-06	6.59405e-05	5.56006	TMED3
650019	0.898803	10.5072	7.684	2.92666e-07	2.40693e-05	6.99022	PGD
2120324	-0.898489	11.2848	-11.6606	3.93389e-10	4.25393e-07	13.4123	SOD1
2000440	0.897697	10.8666	7.27695	6.4303e-07	4.15215e-05	6.21258	LRP10
1770605	0.897458	9.61178	6.02404	8.3393e-06	0.000288159	3.67312	ANPEP
6840750	0.89737	9.64136	4.69468	0.000155706	0.00295434	0.774025	AXUD1
1190079	-0.897041	9.79455	-5.0803	6.54116e-05	0.0014649	1.63127	LOC642817
6860392	-0.896445	10.8142	-6.7516	1.83574e-06	8.9478e-05	5.17406	ETS1
2260082	0.895853	9.52113	6.14148	6.5014e-06	0.000237995	3.9201	LOC649986
110706	0.895684	9.3988	5.64896	1.86811e-05	0.000538182	2.87305	CTBS
2030747	0.895641	7.79284	6.4371	3.5015e-06	0.000147344	4.53391	KBTBD7
4060674	0.894061	9.33566	7.06572	9.76029e-07	5.54492e-05	5.7997	IL1RN
2000528	0.893956	10.4002	3.76797	0.00129137	0.0165847	-1.30173	SDCBP
4890274	0.893511	8.11487	6.0852	7.3236e-06	0.000261987	3.80196	PLXDC2
1940259	0.89302	8.45041	7.24629	6.82938e-07	4.29035e-05	6.15303	TXNDC13
4220725	0.892903	8.32367	6.55834	2.72563e-06	0.000122082	4.78229	DPEP3
5270762	0.892527	8.32263	3.95029	0.000850777	0.0116879	-0.894679	SULF2
6270326	0.89238	8.93283	2.45339	0.0239201	0.178784	-4.08219	HLA-C
7400097	0.891417	8.42346	3.71916	0.00144382	0.0181971	-1.41032	TCN1
6510309	-0.891315	11.5867	-9.90776	5.79474e-09	2.00091e-06	10.8299	RPL13A
10082	0.890773	11.8583	6.92693	1.28816e-06	6.75101e-05	5.52497	RNF149
3060154	-0.8897	11.1895	-7.92065	1.87094e-07	1.76978e-05	7.43144	STARD7
150196	0.889319	10.5529	9.456	1.22372e-08	3.15218e-06	10.1038	SIPA1L1
1980605	-0.889269	9.20098	-10.7423	1.54705e-09	8.18709e-07	12.1042	DOCK10
4670220	0.888733	10.1361	6.93015	1.27985e-06	6.72917e-05	5.53138	IL13RA1
780735	0.888731	8.02448	7.40855	4.97336e-07	3.49693e-05	6.46658	LOC650546
2100333	-0.888552	8.94048	-7.04821	1.01066e-06	5.69514e-05	5.76519	CD96
1090064	-0.887812	11.9364	-4.61357	0.000187125	0.00343666	0.592679	CD74
7400685	-0.886577	11.6973	-6.74965	1.84304e-06	8.96425e-05	5.17012	HCST
4900551	0.885911	9.15843	10.0823	4.36806e-09	1.71506e-06	11.1036	DNTTIP1
4610309	-0.885404	9.37668	-6.43422	3.52243e-06	0.000148097	4.528	CD7
110598	-0.885003	10.6648	-8.60833	5.31568e-08	7.63435e-06	8.66856	LOC649049
3460523	0.883294	8.80095	3.93009	0.000891067	0.0121829	-0.939884	PSTPIP2
6280576	0.883005	14.7511	5.78342	1.39633e-05	0.000425064	3.16177	S100A8
6250296	0.882534	10.7042	8.68383	4.64699e-08	7.13467e-06	8.80036	FAM53C
6960746	-0.882354	9.63388	-7.44216	4.65927e-07	3.38071e-05	6.53104	GIMAP5
5340403	0.881448	10.1957	6.46412	3.31077e-06	0.000141272	4.58945	FLJ31413
3990048	0.881431	9.61738	8.57397	5.65242e-08	7.99998e-06	8.60832	CSNK1D
6980148	0.8789	8.98305	6.41387	3.67446e-06	0.000151737	4.48609	DKFZp434K1815
6960440	0.878583	7.57268	2.64835	0.0158097	0.129649	-3.6983	DEFA4
460608	0.877577	10.3611	4.50991	0.000236822	0.00415202	0.360518	TNFSF13B
2190021	-0.877355	8.13095	-3.92553	0.00090042	0.0122935	-0.950084	CTSW
5570685	0.877086	9.00361	7.14996	8.25801e-07	4.91513e-05	5.96511	RRAGD
4590482	0.876599	10.5703	5.92836	1.02276e-05	0.000335545	3.47063	C1QR1
2060706	-0.876539	7.81919	-3.36489	0.00323378	0.03575	-2.19097	ZNF683
5720647	0.875688	10.9703	6.58717	2.56872e-06	0.000116122	4.84107	ADAM19
3120678	0.874775	7.39665	3.48108	0.00248455	0.028692	-1.93665	LOC58489
2320524	0.87455	10.7955	7.40042	5.0526e-07	3.51926e-05	6.45095	ULK1
2510521	0.874379	8.47157	7.64081	3.17827e-07	2.53258e-05	6.90882	NOD9
7650561	-0.874379	9.64418	-5.37768	3.38212e-05	0.000852746	2.28456	ITK
940246	0.87396	8.1248	7.1614	8.0732e-07	4.83469e-05	5.98751	FAM101B
6330468	0.873161	10.1746	7.28188	6.36849e-07	4.12317e-05	6.22213	OSBPL2
5860075	0.872821	9.44316	8.39332	7.82651e-08	9.87194e-06	8.28889	HIST2H2AC
5810338	0.872373	8.61049	4.51516	0.000234011	0.00411756	0.372283	C3orf34
3190053	-0.871706	10.3658	-12.678	9.4755e-11	2.2506e-07	14.7557	SNRPD2
2970402	0.870844	7.62097	4.89191	9.97725e-05	0.00206619	1.21366	LOC641710
5720072	-0.870536	9.31613	-9.51911	1.10079e-08	3.07813e-06	10.2068	PTPRCAP
2060154	-0.869545	11.0705	-4.03022	0.000708479	0.0101006	-0.715695	NPM1
4220253	0.867063	10.9639	7.44987	4.59015e-07	3.34052e-05	6.54581	FLJ11000
610687	0.867055	7.66	5.53507	2.39438e-05	0.00064692	2.62693	CR1
380561	0.866978	9.58822	8.08756	1.37073e-07	1.40794e-05	7.73784	TBC1D14
1410707	-0.866771	9.88202	-8.62862	5.1267e-08	7.50707e-06	8.70406	DNMT1
2490279	-0.866257	9.53098	-9.92263	5.6561e-09	1.98114e-06	10.8534	C19orf2
3120020	-0.866244	7.72893	-4.72476	0.000145458	0.00280856	0.841227	LAG3
5900600	-0.865987	11.1063	-12.2916	1.60931e-10	2.64981e-07	14.258	LOC644511
830528	0.8651	8.02145	6.63895	2.30996e-06	0.000106703	4.94632	BCL3
1090767	0.86433	7.50131	8.4184	7.47881e-08	9.60741e-06	8.33352	CEACAM4
2510133	0.864164	7.25718	3.7005	0.00150671	0.0188688	-1.45178	SAP30
6110075	0.8638	10.4982	2.42734	0.0252615	0.185843	-4.13238	LOC653778
1450367	-0.863703	10.6007	-5.72602	1.58067e-05	0.00046983	3.03877	ARHGEF3
7100576	-0.863025	8.51674	-4.65342	0.000170958	0.00319354	0.681809	KLRD1
1110138	0.862737	7.7047	10.9615	1.10712e-09	6.65458e-07	12.4252	DOCK5
830324	0.861507	8.71952	5.23388	4.64763e-05	0.00111567	1.96964	ST3GAL4
2320086	0.860973	9.08823	5.25232	4.46151e-05	0.0010764	2.01012	RNASE6
2100519	0.86095	9.31726	6.41903	3.63522e-06	0.000150945	4.49674	IVNS1ABP
770647	-0.859803	9.91639	-8.91259	3.10575e-08	5.3431e-06	9.19491	TINP1
2940687	-0.859682	11.3117	-9.96167	5.30851e-09	1.93398e-06	10.9148	LOC347544
1500377	-0.859588	10.5353	-4.02418	0.000718355	0.0102178	-0.729241	PSME2
1570402	0.859467	7.96239	9.96	5.32285e-09	1.93398e-06	10.9122	SIRPB1
3460189	0.858713	8.31812	7.56814	3.65338e-07	2.79673e-05	6.77128	STXBP5
4390113	-0.858072	8.19568	-6.75555	1.82108e-06	8.93781e-05	5.182	IL32
380731	0.856834	8.34667	3.24891	0.00420179	0.0446372	-2.44273	TUBA1
4290435	0.856517	7.77798	9.92863	5.60122e-09	1.98114e-06	10.8628	DKFZp761E198
4280463	0.855979	10.3628	6.71977	1.95855e-06	9.35366e-05	5.10988	RTN3
5090184	0.855956	9.09632	3.04569	0.00662295	0.0647363	-2.8777	HEBP2
270768	0.854944	7.54783	6.20166	5.72659e-06	0.000215631	4.04599	LOC440731
5420538	-0.854636	10.7069	-5.4169	3.10241e-05	0.000797504	2.37012	GSTP1
3870255	-0.854071	11.6599	-14.3582	1.0907e-11	1.105e-07	16.7578	LOC285900
6760128	0.853561	11.0727	7.32106	5.89822e-07	3.91749e-05	6.29798	NDEL1
610465	0.853552	8.49952	9.34235	1.4825e-08	3.55558e-06	9.91696	KIF1B
4260446	0.852202	9.94446	7.01093	1.08867e-06	5.95137e-05	5.69158	ARID3A
6130441	0.852164	8.56141	8.18432	1.14645e-07	1.24871e-05	7.91366	ARHGAP19
6480725	-0.852102	9.81136	-6.02749	8.27831e-06	0.000286542	3.6804	PRKCH
3850687	0.852093	9.56223	5.56332	2.25111e-05	0.000616768	2.68811	NARF
2970437	0.851818	9.0195	3.67678	0.00159062	0.0197637	-1.50444	TLR5
1780348	-0.851815	9.85227	-11.5748	4.45519e-10	4.25393e-07	13.2941	IMP3
6660709	0.850594	9.77518	8.01873	1.55765e-07	1.55284e-05	7.61197	ITGAM
4220181	-0.850409	9.75253	-7.02617	1.05606e-06	5.82955e-05	5.72169	NDUFS8
1190274	-0.848689	12.5386	-6.82499	1.58196e-06	7.93273e-05	5.32147	RPL18
4120386	0.847519	7.50987	7.95615	1.7506e-07	1.70748e-05	7.49695	LOC340527
1770468	-0.847061	9.21418	-6.47121	3.26257e-06	0.000139951	4.604	STAT4
6180427	0.846597	7.37251	6.95316	1.22212e-06	6.50286e-05	5.57709	GPR160
5670603	0.846583	9.91401	4.33045	0.000356517	0.00576286	-0.0420591	RNF130
1010398	-0.846561	8.3651	-9.22375	1.81407e-08	4.05144e-06	9.72016	FASN
1010136	0.846344	11.025	8.11624	1.29987e-07	1.35096e-05	7.79008	HSPA6
1850523	0.846205	10.2548	6.22847	5.41267e-06	0.000206688	4.10191	SLC31A2
4810703	-0.845761	9.84589	-6.65781	2.22252e-06	0.000103252	4.98457	LOC645385
4760192	0.844333	11.2537	5.14443	5.66977e-05	0.00130826	1.77279	PACSIN2
6100450	0.843841	9.90657	5.97668	9.22443e-06	0.000311882	3.57304	SCAP2
5080398	0.84371	7.93125	2.7031	0.01405	0.118093	-3.58803	TLR1
5550128	0.843674	8.61092	9.33597	1.49863e-08	3.57665e-06	9.90642	LOC349236
1710451	0.84367	7.79042	9.19928	1.89163e-08	4.12743e-06	9.67931	DAPK2
840564	0.843575	10.0505	10.2612	3.28154e-09	1.41388e-06	11.38	MTMR3
1470070	-0.843022	9.41731	-8.83074	3.58475e-08	5.99762e-06	9.05456	LIPA
2320301	-0.84294	11.051	-10.4323	2.50417e-09	1.16115e-06	11.6408	ITGB1
650102	-0.842611	9.78085	-12.4302	1.32876e-10	2.59668e-07	14.4383	C6orf49
1710438	0.840863	8.2986	5.62022	1.98859e-05	0.000564538	2.81107	MPZL1
6580189	-0.840485	12.3399	-11.9791	2.49399e-10	3.20757e-07	13.8444	LOC649821
2760593	0.839994	8.15201	8.40184	7.70656e-08	9.77725e-06	8.30406	C1RL
2120500	0.83962	10.6405	5.45671	2.84264e-05	0.000745966	2.4568	ACTN1
4560128	-0.839132	9.08968	-9.78504	7.08279e-09	2.26868e-06	10.6353	OCIAD2
1240754	-0.838637	10.0286	-2.14373	0.0451342	0.282885	-4.65941	OAS2
2190609	0.838079	8.45386	7.02788	1.05247e-06	5.82955e-05	5.72506	OSCAR
4070327	0.8377	9.3009	7.71079	2.78107e-07	2.3265e-05	7.04057	MTX1
5900632	0.837177	8.76503	6.2298	5.39758e-06	0.000206435	4.10468	MGC18216
3310594	0.835936	7.99169	5.16131	5.46071e-05	0.00127208	1.80998	LILRA5
10541	0.835645	8.30717	7.65913	3.06889e-07	2.47376e-05	6.94339	TM6SF1
3390075	0.835508	8.80572	5.87371	1.14982e-05	0.00036685	3.35445	HIST1H2BD
610148	0.835108	7.31491	3.54742	0.00213649	0.0253705	-1.79063	BPI
6660193	-0.833822	11.6181	-11.9581	2.56937e-10	3.20757e-07	13.8162	RPL4
4540189	0.833792	8.563	3.62246	0.0018006	0.0219766	-1.62483	LOC399744
7320112	0.83342	8.57561	8.87152	3.33717e-08	5.681e-06	9.1246	SH3BP5L
4050437	0.832211	11.2542	6.92293	1.29856e-06	6.78358e-05	5.51701	LILRA2
2630270	-0.831606	10.1284	-8.30729	9.15188e-08	1.08413e-05	8.13518	SND1
6200376	0.83135	14.7373	8.41277	7.55541e-08	9.68027e-06	8.32351	IFITM2
1230220	0.831018	7.97633	8.64319	4.99532e-08	7.46034e-06	8.72951	LOC441124
4070164	-0.83061	11.4393	-7.87222	2.04909e-07	1.87885e-05	7.3418	COX7C
3310446	0.830207	10.3004	6.34668	4.22599e-06	0.000168975	4.3474	C12orf35
3710435	-0.830184	8.20238	-8.48521	6.62899e-08	8.86664e-06	8.45195	KLF12
4920408	0.829912	11.5154	2.03712	0.0557347	0.325874	-4.84739	LOC644914
6480239	-0.829504	8.23074	-4.37588	0.000321401	0.00531343	0.0599038	LGALS2
3420471	-0.829427	9.10662	-3.88996	0.000976822	0.0131505	-1.0296	ST6GAL1
3190437	0.829026	8.96583	6.37004	4.02513e-06	0.000162767	4.39569	IFNAR1
4180601	0.828429	9.28125	2.79282	0.0115634	0.101057	-3.40525	IQGAP1
4730669	0.828184	7.30061	4.58257	0.000200768	0.00364324	0.523288	ADORA3
3180682	0.828169	11.2107	7.87406	2.04204e-07	1.87885e-05	7.3452	FAM100B
3710632	-0.82798	10.9212	-6.55138	2.76494e-06	0.000123388	4.76809	SSR4
4180356	-0.826479	8.31977	-5.89059	1.10893e-05	0.000356137	3.39038	ZAP70
4290037	-0.825123	8.59227	-7.7145	2.7615e-07	2.3141e-05	7.04754	LOC387882
240736	-0.824143	8.31494	-5.55021	2.31647e-05	0.000630068	2.65973	PTPN4
510338	0.823761	9.85597	6.40251	3.76219e-06	0.000154689	4.46269	TLR8
580121	0.823686	9.73449	1.6821	0.108824	0.484485	-5.42652	FTHL8
5360215	0.823027	9.96872	6.91924	1.30821e-06	6.82668e-05	5.50968	NADK
6350113	-0.822105	10.1149	-7.75041	2.57938e-07	2.21095e-05	7.11485	RGC32
6650470	0.822092	8.77637	8.63013	5.11291e-08	7.50707e-06	8.7067	KLHL21
4780022	0.821789	9.4738	8.63845	5.03763e-08	7.47766e-06	8.72124	SEMA4A
1820598	-0.821682	9.28696	-8.29343	9.38632e-08	1.09067e-05	8.11032	ICAM2
4200482	0.821059	10.4272	7.76862	2.49184e-07	2.16257e-05	7.14891	LAMP2
2510538	-0.820566	8.0246	-7.66574	3.0304e-07	2.45466e-05	6.95585	CX3CR1
7610243	0.820107	8.90979	7.82115	2.25613e-07	2.01391e-05	7.2469	MOSPD2
6960554	0.819472	8.80803	2.92117	0.0087266	0.0808972	-3.1396	LCN2
7330017	0.818876	7.88234	6.93218	1.27465e-06	6.71832e-05	5.53542	MXD3
6980168	0.818794	9.63776	7.29067	6.25974e-07	4.07237e-05	6.23916	LOC641704
5720372	-0.818608	8.46596	-1.40347	0.176524	0.612663	-5.82294	HBZ
2370561	-0.817919	8.2766	-6.24576	5.21964e-06	0.000200892	4.13793	ITGB7
6350360	-0.816794	12.0802	-5.52027	2.47313e-05	0.000663777	2.59485	ATP5G2
4280373	0.816151	9.34203	8.07345	1.40706e-07	1.4369e-05	7.71209	SVIL
4920647	0.815441	7.41329	4.4728	0.000257699	0.00444915	0.277307	MRVI1
60328	-0.813917	10.117	-8.76723	4.00908e-08	6.42974e-06	8.94502	LOC339123
2450170	0.813542	8.11431	7.72812	2.69093e-07	2.27059e-05	7.07308	MAP4K4
2060121	0.813353	8.37581	9.59578	9.6856e-09	2.74761e-06	10.3313	MGRN1
2060010	0.813312	9.48082	7.90278	1.93473e-07	1.81496e-05	7.3984	BAZ2B
5870240	-0.812645	9.94514	-6.20049	5.74069e-06	0.000215906	4.04355	NHP2L1
4230653	0.810416	7.68173	11.8719	2.90449e-10	3.47932e-07	13.7001	ADCY4
4920204	0.810376	9.56217	7.96682	1.71603e-07	1.67768e-05	7.51659	BAZ1A
5870743	-0.810226	10.9249	-6.40817	3.71816e-06	0.000153282	4.47437	HLA-DMB
6130594	0.810146	8.99364	7.1787	7.802e-07	4.70702e-05	6.02132	PLAUR
6420367	0.810014	7.68326	4.99936	7.83908e-05	0.00169854	1.45216	NOV
2850500	-0.809897	8.90325	-2.85923	0.0100003	0.0900802	-3.26839	GBP4
5270661	0.809764	7.81994	9.19485	1.90603e-08	4.12743e-06	9.67192	ABHD2
7400703	-0.809221	12.0707	-9.64042	8.99305e-09	2.66979e-06	10.4034	EEF1B2
2650440	0.80881	10.1999	2.08556	0.050667	0.305906	-4.76272	FTHL2
3400196	0.80755	8.41736	5.95647	9.63115e-06	0.000321521	3.53023	DHX34
1770075	-0.807408	10.534	-9.13204	2.12298e-08	4.28685e-06	9.5667	LOC647048
990553	-0.807173	9.81112	-8.07286	1.40861e-07	1.4369e-05	7.711	FLJ20647
1710273	0.806519	7.74336	6.16655	6.16624e-06	0.000228649	3.97261	PFKFB3
1690521	-0.806233	8.59485	-5.38428	3.33331e-05	0.000844815	2.29897	RRAS
7400528	0.806091	7.54113	6.04911	7.90645e-06	0.000276141	3.72599	LOC388572
1030039	0.805931	9.58142	4.19711	0.000483535	0.00740544	-0.341362	HIST2H2AA
5570523	0.805613	10.9926	8.21402	1.08555e-07	1.19305e-05	7.96734	RASSF2
7160546	-0.805435	9.1868	-8.42106	7.44292e-08	9.59976e-06	8.33825	FLJ11305
4730397	0.804404	10.5603	6.97396	1.17222e-06	6.28173e-05	5.61837	FCGR2A
6650328	0.802687	9.91755	4.38865	0.000312177	0.00518912	0.0885488	E2F3
4730156	0.802387	10.8003	6.90209	1.35411e-06	7.00111e-05	5.47552	RAB24
7400121	-0.801948	10.9496	-7.48419	4.2951e-07	3.16362e-05	6.61145	DDB1
5860653	0.799628	8.92719	4.50843	0.000237626	0.00416462	0.35718	C14orf94
1110041	-0.799621	9.07971	-7.53543	3.89073e-07	2.92779e-05	6.70912	ACSL5
5560739	0.798888	8.04437	8.68686	4.62204e-08	7.13467e-06	8.80563	EIF2C4
2850270	0.798778	11.3684	8.79745	3.80101e-08	6.18929e-06	8.99721	SSH2
3610543	0.798624	8.80605	7.88612	1.99624e-07	1.85268e-05	7.36755	CANT1
7650379	0.798003	10.0088	3.26281	0.00407231	0.0435755	-2.41269	FLJ32028
3130091	0.79771	9.02159	5.8489	1.21274e-05	0.000381424	3.30161	TMCO3
3440392	0.797407	7.39438	3.15237	0.00521917	0.0534509	-2.65042	FLJ20273
4280326	-0.796731	11.9055	-11.4957	4.99998e-10	4.25393e-07	13.1843	RPS5
6380228	0.796334	12.5869	3.48595	0.0024572	0.0284166	-1.92595	MNDA
7000747	0.795987	11.2245	5.7519	1.49465e-05	0.00045029	3.09427	UBN1
4390332	0.795009	7.75328	9.51608	1.1064e-08	3.07813e-06	10.2019	RCN3
6040634	0.794214	8.4544	5.39066	3.2868e-05	0.000834764	2.3129	LOC652878
2600215	-0.79407	7.73186	-4.6452	0.000174172	0.0032445	0.663438	D4S234E
3310010	-0.793857	9.83243	-5.15613	5.52402e-05	0.00128132	1.79857	PPA1
70630	-0.792899	12.4772	-11.487	5.06423e-10	4.25393e-07	13.1721	LOC641814
7400598	0.792365	8.44603	6.22047	5.50447e-06	0.000209045	4.08523	WWC3
6620427	-0.792306	8.63622	-8.382	7.98888e-08	9.87194e-06	8.26872	PEA15
1170497	0.79173	12.2743	8.3591	8.32801e-08	1.01621e-05	8.22788	PTPNS1
6450711	-0.791411	11.2994	-13.1017	5.37855e-11	1.8682e-07	15.2849	LOC649447
7050468	0.790624	8.77078	5.60028	2.07682e-05	0.000583125	2.76802	ITPK1
6620431	-0.790186	8.76649	-5.71297	1.62594e-05	0.000481177	3.01076	ITPR3
4810592	-0.789894	9.03058	-6.84172	1.52937e-06	7.71613e-05	5.35496	VEGFB
1500446	0.789464	11.4114	8.96316	2.84357e-08	5.02098e-06	9.28116	IFNGR1
2260193	-0.789182	9.5226	-5.93843	1.00097e-05	0.00033052	3.49198	SF3A3
5720475	0.788791	12.5573	6.01122	8.56987e-06	0.000293625	3.64606	FLOT2
130167	-0.788752	8.50649	-8.52639	6.15578e-08	8.39513e-06	8.52463	PPP3CC
450022	0.788327	10.1407	3.37392	0.00316832	0.035162	-2.17127	KPNB1
1470008	0.788293	11.4359	6.11216	6.91723e-06	0.00025058	3.8586	SELL
2690487	-0.787847	12.7478	-7.91776	1.88111e-07	1.77492e-05	7.4261	RPS3
6480010	-0.787803	10.809	-12.1619	1.92831e-10	2.93387e-07	14.0874	RPL15
6860477	0.787628	8.58036	7.60355	3.41331e-07	2.66359e-05	6.83839	PRAM1
160465	0.785904	7.9033	5.85568	1.1952e-05	0.000377126	3.31606	TMEM55A
4200551	-0.785364	9.64953	-10.6494	1.78521e-09	9.14911e-07	11.9666	MDH1
3930546	0.785033	12.2194	8.48074	6.6826e-08	8.91386e-06	8.44404	C6orf32
6660129	0.78415	11.8358	7.04335	1.0205e-06	5.7307e-05	5.7556	LBR
6840551	-0.783986	10.9989	-5.93124	1.01649e-05	0.000333938	3.47673	KRTCAP2
4730543	0.78372	8.78478	7.59641	3.46033e-07	2.6827e-05	6.82489	C16orf57
270519	0.782762	8.42351	6.81605	1.61083e-06	8.052e-05	5.30355	MGC4093
1580554	-0.782392	8.91902	-4.72647	0.000144896	0.00280054	0.845046	ADRB2
3140246	0.782349	9.1293	6.76669	1.78035e-06	8.80549e-05	5.20441	LOC88523
1940543	0.780847	8.4111	9.13035	2.12915e-08	4.28685e-06	9.56386	EXOC6
3940458	-0.780803	8.10241	-5.57128	2.21236e-05	0.000611312	2.70533	PYHIN1
6280040	0.779634	10.4661	5.66183	1.8166e-05	0.000526145	2.90078	CENTD3
6400064	0.778897	7.92658	11.1055	8.91039e-10	5.86243e-07	12.633	PPP1R3D
4010541	0.778888	8.85931	6.95716	1.21235e-06	6.47211e-05	5.58504	PILRA
6960717	0.778784	7.63208	7.88253	2.00977e-07	1.85941e-05	7.3609	ZNF537
1070689	0.778481	10.4808	6.04957	7.89869e-06	0.000276141	3.72697	C5AR1
4010215	0.778382	12.9041	9.44841	1.23946e-08	3.15218e-06	10.0914	LITAF
1990438	0.778306	9.26735	5.1103	6.11769e-05	0.00138802	1.69751	TNFSF14
4060195	-0.778256	8.52646	-6.65866	2.21864e-06	0.000103252	4.9863	SNRPN
1240403	0.777915	9.63666	5.28724	4.12956e-05	0.00101033	2.08672	HK3
7400402	-0.777832	9.48766	-7.3621	5.44397e-07	3.69666e-05	6.37721	NUDT1
6130324	-0.77718	8.55622	-1.66215	0.112804	0.493983	-5.45671	LOC649143
5890333	-0.776476	8.62767	-8.38968	7.87823e-08	9.87194e-06	8.28242	BIN1
1570750	-0.775246	10.4639	-1.94622	0.0664879	0.36376	-5.00281	LOC651894
7330161	0.775107	9.15023	5.62612	1.9632e-05	0.000558308	2.82382	LOC651309
1690544	0.774648	11.4219	5.43026	3.01267e-05	0.000778132	2.39921	ZYX
2970079	0.774411	9.03542	9.13668	2.1061e-08	4.28685e-06	9.57449	IQSEC1
3140193	0.774279	8.6518	5.70502	1.65417e-05	0.000488101	2.99369	KIAA0247
1300136	-0.774241	8.97322	-7.57308	3.61884e-07	2.78448e-05	6.78066	POLD2
4880431	-0.773391	9.17783	-3.32831	0.00351273	0.0383548	-2.27063	PRDX2
520647	0.773272	10.3854	4.63003	0.000180268	0.00333655	0.629502	NT5C2
1190575	-0.772837	8.82226	-8.89368	3.21016e-08	5.50328e-06	9.16256	CCND2
990435	0.77189	7.37074	6.9877	1.14042e-06	6.15561e-05	5.6456	TP53INP2
650358	-0.771753	9.00493	-9.02602	2.54946e-08	4.71961e-06	9.38788	APRT
1110053	-0.771367	10.159	-6.22942	5.40181e-06	0.000206435	4.1039	POU2F2
510450	-0.770684	9.62536	-7.38673	5.18896e-07	3.57334e-05	6.42463	RCC2
7210692	0.770585	10.0335	7.26505	6.58227e-07	4.21118e-05	6.18948	NUMB
1300192	-0.770492	9.50257	-9.0628	2.3922e-08	4.58569e-06	9.4501	ABCF1
4210414	0.770248	9.12701	3.50954	0.00232886	0.0271641	-1.87407	FTHL11
3460397	0.770179	10.2683	6.42439	3.59504e-06	0.000149609	4.50777	FLOT1
830762	0.769528	10.8363	4.55507	0.000213714	0.00383952	0.461688	TXN
360324	-0.769124	9.70602	-5.9391	9.99538e-06	0.000330377	3.49341	TSPAN17
4760768	0.768961	7.88578	6.59751	2.51479e-06	0.000114063	4.8621	HK2
4180142	-0.768944	11.341	-6.80393	1.65084e-06	8.22667e-05	5.27924	EIF3S6IP
870592	0.768487	7.40404	11.2906	6.76201e-10	5.10458e-07	12.8966	FLJ39575
2640373	-0.768448	8.94473	-12.3832	1.41767e-10	2.59668e-07	14.3773	RFX5
4860132	0.767331	9.59417	6.56983	2.66195e-06	0.000119559	4.80573	AGTPBP1
1300743	0.767027	12.7105	8.07205	1.41072e-07	1.4369e-05	7.70953	TSC22D3
4250452	0.766805	11.6522	3.56915	0.00203331	0.0243352	-1.74268	GMFG
430328	-0.766638	11.8778	-4.80293	0.000121913	0.0024376	1.01561	ERAF
3450040	0.766315	8.45059	9.68601	8.33885e-09	2.51076e-06	10.4768	G6PD
5810681	0.766229	12.9565	6.06471	7.64886e-06	0.000270762	3.75885	ICAM3
6650086	-0.765758	12.7787	-9.23651	1.77496e-08	4.02302e-06	9.74142	LOC646200
2470767	-0.76571	8.99555	-3.25983	0.00409972	0.0438399	-2.41913	HPS1
1690079	0.765486	8.06411	4.00219	0.00075544	0.010627	-0.778485	IKIP
830619	0.765418	7.31531	2.59313	0.0177946	0.141934	-3.80845	CTSG
5130082	-0.765335	9.25633	-9.03699	2.50144e-08	4.66619e-06	9.40647	HSP90AB1
2750626	-0.765261	12.1185	-7.78237	2.42776e-07	2.12973e-05	7.1746	EEF2
2510035	0.765095	11.2818	5.91154	1.06025e-05	0.000344824	3.43491	ARHGAP9
1770598	0.764987	8.85388	8.24462	1.02629e-07	1.15932e-05	8.02255	KIAA1600
5340050	0.763697	7.38172	7.65537	3.09104e-07	2.48339e-05	6.93629	LOC391257
5220538	-0.763534	9.43945	-7.20539	7.40174e-07	4.53294e-05	6.07342	IL10RA
7100445	0.763521	9.42574	7.80181	2.34012e-07	2.06344e-05	7.21086	RAF1
1500594	0.763404	12.1311	8.38441	7.95391e-08	9.87194e-06	8.27303	IFNGR2
650192	0.762567	7.59088	7.801	2.34371e-07	2.06344e-05	7.20935	JMJD2B
4220132	-0.762475	10.0991	-7.85816	2.10404e-07	1.91476e-05	7.31571	BUB3
1780152	0.762278	8.56892	4.17621	0.00050722	0.00770215	-0.388277	CEACAM1
3780327	-0.761954	12.5825	-9.15765	2.03156e-08	4.28685e-06	9.60967	LOC649032
3180470	0.761669	10.065	4.94039	8.94747e-05	0.00188927	1.32136	FLJ20186
1580528	-0.761479	10.417	-5.51865	2.48189e-05	0.000665395	2.59134	SERPINB6
2900482	-0.761122	10.3958	-12.3456	1.49335e-10	2.59668e-07	14.3284	EIF3S5
6100671	0.76095	7.766	3.82658	0.00112932	0.0148764	-1.1711	KRT23
2810168	-0.760114	11.748	-10.7652	1.49348e-09	8.16054e-07	12.138	LOC643433
5690201	0.760016	8.19338	4.51003	0.00023676	0.00415202	0.36078	F2RL1
510240	0.759904	7.84234	6.16433	6.19523e-06	0.000229549	3.96796	PLXNC1
5700403	-0.759521	8.80407	-10.9304	1.16057e-09	6.80777e-07	12.38	WDR54
5860048	-0.759118	8.98718	-5.07086	6.68052e-05	0.00149131	1.6104	ECHDC2
3370193	-0.759071	8.94342	-8.37153	8.14208e-08	1.00104e-05	8.25006	THOC3
290411	-0.758271	8.31152	-7.79122	2.38745e-07	2.09816e-05	7.19111	RAP2A
7100112	0.758222	9.68382	4.19073	0.000490644	0.00749544	-0.355681	TNFRSF10B
2600270	0.756996	7.44652	5.59779	2.08808e-05	0.00058498	2.76266	COL18A1
650767	0.75619	10.224	5.27281	4.26351e-05	0.00103678	2.05509	PPP2R5A
3990360	0.756077	12.4873	2.23	0.0379361	0.251155	-4.50305	FCGR3B
6110768	-0.755302	8.75886	-6.64648	2.27462e-06	0.00010527	4.9616	ATIC
1260228	0.754999	7.3123	2.71119	0.0138066	0.11654	-3.57167	PLSCR1
5290289	0.754993	8.08275	2.80507	0.0112585	0.0989069	-3.3801	YIPF4
7160458	-0.754714	9.11553	-9.04155	2.48178e-08	4.66526e-06	9.41418	FBXL10
60482	0.753383	8.79672	2.56752	0.0187933	0.148033	-3.85918	IFI16
4280332	-0.753329	9.23667	-9.89101	5.955e-09	2.02749e-06	10.8035	DDX24
60201	-0.753166	9.7446	-5.0838	6.49034e-05	0.00145553	1.63899	UROS
3800328	0.753052	7.61762	7.01694	1.07569e-06	5.89774e-05	5.70346	C3orf62
3170092	-0.752684	12.7102	-8.21605	1.0815e-07	1.19237e-05	7.97102	GLTSCR2
6200437	0.752646	9.27404	6.17556	6.05025e-06	0.000225205	3.99145	KIAA1539
6480102	-0.752525	8.29475	-11.4905	5.03824e-10	4.25393e-07	13.177	LOC388275
2600706	0.751996	10.8858	7.86307	2.08471e-07	1.90786e-05	7.32481	RAB6IP1
270717	0.751855	8.77744	9.42317	1.29325e-08	3.2456e-06	10.05	PELI2
4590468	0.751709	9.397	3.02299	0.00696584	0.0673443	-2.92574	FAM63A
1690446	-0.751665	8.4316	-6.92811	1.28511e-06	6.74228e-05	5.52732	RHOC
6840403	-0.751481	12.5359	-5.1287	5.87193e-05	0.00134472	1.7381	LOC285053
3440377	0.750768	7.52821	3.20649	0.00462245	0.0482947	-2.53422	PKN2
2650626	-0.750614	10.1	-6.45205	3.39458e-06	0.00014359	4.56466	MXD4
2480491	0.749848	8.79756	6.06289	7.67846e-06	0.000271195	3.75502	SEMA4B
6590025	-0.749377	10.6844	-7.76593	2.50457e-07	2.16975e-05	7.14388	GTF3A
2230008	0.748654	7.21951	8.85793	3.41764e-08	5.75759e-06	9.10128	SLC37A3
1440382	-0.748617	8.67168	-6.72381	1.94251e-06	9.31772e-05	5.11803	UBE2G2
4490129	0.748456	9.01411	4.90735	9.63673e-05	0.00201021	1.24799	SQRDL
6110088	0.747813	8.82544	3.98026	0.000794362	0.0110627	-0.827614	ABCA1
1570202	-0.747676	9.5708	-9.81577	6.73447e-09	2.21541e-06	10.6842	SEPW1
2000482	-0.747585	10.9621	-3.79164	0.00122331	0.0158571	-1.24901	C21orf7
2630544	0.747509	8.74517	4.37349	0.000323161	0.00533076	0.0545318	TACC3
5670100	0.747411	7.59731	3.47423	0.00252353	0.0290663	-1.9517	AYTL1
6020280	0.746424	9.02524	4.01494	0.000733707	0.0103722	-0.749931	MCL1
1240152	0.746135	8.37253	12.6123	1.03582e-10	2.29233e-07	14.6722	NSFL1C
6370041	-0.745752	9.44325	-8.2851	9.53025e-08	1.09914e-05	8.09536	TTC3
3420315	-0.745601	10.4462	-5.29777	4.03449e-05	0.000991556	2.10979	MAT2A
2100114	0.74554	7.91239	5.02431	7.41331e-05	0.00162217	1.50741	SH3GLB1
2650468	0.745237	7.91132	6.12096	6.78962e-06	0.00024743	3.87707	EGLN1
7150451	-0.745105	11.2838	-11.1156	8.77701e-10	5.85378e-07	12.6474	LOC283412
1820056	-0.74485	10.0066	-11.0374	9.87192e-10	6.40846e-07	12.535	COX6C
5670544	0.744665	7.41248	6.72461	1.93933e-06	9.31166e-05	5.11966	LOC653610
2340411	0.744497	7.74323	7.4712	4.40434e-07	3.2343e-05	6.58664	ETS2
510451	0.743846	8.31722	7.46753	4.43579e-07	3.25249e-05	6.57961	SLC19A1
5560280	-0.743158	10.7536	-4.4967	0.000244051	0.00425757	0.330899	CECR1
2760156	0.74288	10.1471	5.44523	2.91521e-05	0.000759	2.43181	HCK
160241	0.742863	7.89296	5.2165	4.83041e-05	0.00115171	1.93144	PXN
1820082	-0.741746	9.26765	-8.50547	6.39158e-08	8.64408e-06	8.48774	RAB7L1
4590593	0.741682	14.221	9.07206	2.35424e-08	4.56287e-06	9.46572	LOC440926
730180	0.74153	10.8094	5.06846	6.71653e-05	0.00149725	1.60508	NUP214
2650017	0.741372	7.57057	3.03512	0.00678046	0.0659535	-2.90007	TREML3
610068	0.740675	7.18088	6.34081	4.27806e-06	0.000170447	4.33525	FLJ14001
70767	0.740431	8.32725	5.90608	1.07272e-05	0.000348182	3.42331	USP15
240468	0.740062	9.21362	5.79026	1.37589e-05	0.00042071	3.17639	ANTXR2
2000390	0.739263	7.41549	8.4337	7.27473e-08	9.47018e-06	8.36069	PFTK1
4250719	-0.738892	8.95732	-6.48417	3.17625e-06	0.00013746	4.63058	BMS1L
4280047	0.738716	9.3729	7.89503	1.96309e-07	1.83449e-05	7.38406	RNF13
6380148	-0.738522	12.9184	-10.6109	1.89507e-09	9.41481e-07	11.9092	RPL8
7380524	-0.738302	7.93224	-7.9379	1.81145e-07	1.74296e-05	7.46328	LOC648470
2940403	-0.738017	9.16802	-8.44788	7.09069e-08	9.25535e-06	8.38585	REXO2
2810113	-0.73793	12.976	-11.9802	2.49029e-10	3.20757e-07	13.8458	RPS2
1440682	0.736545	8.97163	5.59667	2.0932e-05	0.000586036	2.76023	FLJ38101
160377	-0.734825	11.275	-4.53774	0.000222301	0.00396158	0.422865	LGALS1
4920376	0.733912	11.2499	6.00882	8.61379e-06	0.000294715	3.64099	MAPK3
4280674	0.733901	13.7068	11.842	3.03107e-10	3.47932e-07	13.6597	TYROBP
4120270	0.733307	8.35182	4.78806	0.000126075	0.00250436	0.982451	YOD1
7150112	0.73319	11.0312	4.70152	0.000153312	0.00292373	0.789318	TNFRSF1A
7320364	-0.733056	9.72709	-5.73019	1.56647e-05	0.000466911	3.04772	GPS1
6520167	-0.733008	9.17959	-6.39845	3.79408e-06	0.000155225	4.45432	BIRC3
7550445	-0.732905	8.01955	-4.7105	0.000150227	0.00288184	0.80938	CXCR3
6550180	0.732847	7.94129	13.3777	3.74879e-11	1.65925e-07	15.6205	USP32
7320189	0.732228	9.7447	4.18066	0.000502081	0.00763662	-0.378287	FES
4390095	0.731826	8.36148	7.24131	6.8965e-07	4.31638e-05	6.14335	GATS
7650386	-0.731753	12.4714	-7.11826	8.79305e-07	5.14552e-05	5.90299	Septin 9
2480048	0.731603	11.1778	3.87104	0.00102005	0.0136587	-1.07186	GNG10
6330376	-0.731576	9.92714	-1.93464	0.0679831	0.368832	-5.02227	CA1
4220164	0.731393	8.30025	8.30053	9.26548e-08	1.09062e-05	8.12306	GNB2
4150187	-0.731211	14.7626	-1.47924	0.155377	0.580571	-5.72068	HBG1
1090239	0.73031	9.0035	10.381	2.71462e-09	1.24686e-06	11.563	ANXA11
4250543	0.729871	7.61237	4.27777	0.000402108	0.00635837	-0.160316	LOC650919
3310646	0.729477	7.73179	9.21399	1.8446e-08	4.08218e-06	9.70388	PTAFR
1660707	-0.728638	12.5759	-13.8025	2.17641e-11	1.17737e-07	16.1235	LOC149224
4230181	-0.728633	11.4343	-3.32254	0.0035588	0.0387796	-2.28316	TESC
290386	0.728045	8.92103	6.8521	1.49764e-06	7.5875e-05	5.37573	RGS19
4560497	-0.72797	9.23682	-6.43021	3.55183e-06	0.000148628	4.51976	HSPA9B
2970634	-0.727747	9.24036	-5.99358	8.89803e-06	0.000302105	3.60878	MACF1
5810598	0.727616	8.37473	4.36619	0.000328589	0.00540165	0.0381499	GNAI3
7610639	-0.72736	10.0058	-7.77959	2.44058e-07	2.13674e-05	7.16941	BTBD2
6290431	-0.727209	10.8531	-8.7302	4.28022e-08	6.7223e-06	8.88092	EIF3S4
3930367	-0.727139	9.57999	-6.62829	2.36092e-06	0.000108648	4.92469	COMMD7
5550424	0.726319	9.79538	6.66584	2.18634e-06	0.000102229	5.00084	CDC2L6
2680632	-0.726314	9.61045	-6.94086	1.25263e-06	6.62181e-05	5.55267	ODC1
3180661	-0.726042	8.51872	-5.49836	2.59459e-05	0.000689536	2.54731	C19orf12
3930292	0.725132	7.9409	6.67454	2.14781e-06	0.000100742	5.01846	LOC651738
2070044	0.724119	8.36277	7.92868	1.843e-07	1.75654e-05	7.44627	APOB48R
4920064	-0.723823	9.537	-6.59724	2.51615e-06	0.000114063	4.86156	HDDC2
3420343	-0.723014	8.20206	-10.4466	2.44889e-09	1.15756e-06	11.6623	CCDC64
6270491	-0.722401	8.51328	-5.85393	1.19969e-05	0.000377811	3.31233	BOLA3
5690477	-0.722242	11.305	-6.71795	1.96582e-06	9.36495e-05	5.10621	EMP3
4040221	0.721361	10.5101	6.08082	7.39194e-06	0.00026385	3.79275	SERPINB1
6040184	0.721103	9.01981	7.0186	1.07214e-06	5.88491e-05	5.70673	HSPBAP1
4880364	-0.72088	8.59342	-8.9751	2.78511e-08	4.96698e-06	9.30147	TMEM109
5550309	-0.720211	9.56542	-7.35654	5.50337e-07	3.73179e-05	6.36648	PARP1
6860246	0.719817	8.25514	6.75144	1.83634e-06	8.9478e-05	5.17373	C16orf7
4180382	0.719617	10.1266	7.37718	5.28636e-07	3.60848e-05	6.40625	ADAM8
4900048	0.718739	7.44802	3.28438	0.00387901	0.0418197	-2.36599	LMNB1
3800095	0.718612	7.26834	4.714	0.000149042	0.00286445	0.817196	PHACTR1
2570685	-0.718352	9.63976	-6.75965	1.80597e-06	8.88155e-05	5.19025	ASPSCR1
70142	-0.718201	12.3089	-8.73398	4.25171e-08	6.69913e-06	8.88746	EEF1G
4180079	0.718047	8.84076	7.82832	2.2258e-07	1.99205e-05	7.26025	RNASEL
1010762	-0.716674	9.32438	-5.70197	1.66516e-05	0.000489859	2.98712	FLJ22471
1030487	0.716355	7.74768	8.84023	3.52551e-08	5.91885e-06	9.07087	SLC22A17
6480170	-0.716283	8.55484	-8.1305	1.26604e-07	1.33487e-05	7.81603	MAGED1
580050	0.715312	7.7437	6.39984	3.78315e-06	0.000155225	4.45718	TXNDC3
20328	0.715299	10.2142	4.2769	0.000402903	0.00636888	-0.162257	STX11
7330678	0.715095	7.55729	7.07291	9.62168e-07	5.49035e-05	5.81386	LOC388312
6960736	-0.714964	8.15617	-4.44909	0.000271997	0.00464626	0.224139	EDG1
1050324	-0.714889	8.85313	-8.56685	5.7249e-08	8.05573e-06	8.59582	LPIN1
3780646	-0.714727	9.39248	-8.14898	1.22358e-07	1.31217e-05	7.8496	CCT2
650292	-0.714619	10.919	-3.31168	0.00364716	0.0395741	-2.30675	LOC648622
7100136	0.714449	8.63794	7.43221	4.75004e-07	3.42108e-05	6.51198	SLC36A1
870403	0.713854	8.32614	8.62737	5.13811e-08	7.50707e-06	8.70188	LPGAT1
1500739	-0.713832	8.3701	-5.39897	3.22722e-05	0.000823501	2.33102	LRRC33
2320619	-0.712987	8.81586	-7.8599	2.09718e-07	1.91208e-05	7.31893	ATP8B2
7200180	0.712634	12.8523	6.01795	8.44811e-06	0.000290886	3.66026	HCLS1
1470682	0.712475	7.64109	3.46614	0.00257034	0.0295216	-1.96946	PTGS2
6400242	0.711972	11.2259	4.85519	0.000108367	0.00221311	1.13199	TMEM71
4010437	0.711893	7.53223	8.38549	7.93838e-08	9.87194e-06	8.27495	CSTA
1780403	-0.711695	10.4416	-7.00254	1.10709e-06	6.03591e-05	5.67498	SEC61G
3800072	0.711587	8.53074	3.75347	0.0013349	0.0170538	-1.33401	RAB20
5390195	0.711252	9.60905	3.32783	0.00351648	0.0383872	-2.27165	PSCDBP
1400136	0.711003	10.2159	6.02324	8.35355e-06	0.000288446	3.67142	CHMP2A
4890398	-0.710426	10.4546	-8.1303	1.26652e-07	1.33487e-05	7.81566	HIGD2A
3120215	0.710355	7.46769	5.09564	6.32111e-05	0.00142414	1.66513	MAK
4590678	0.710211	10.3384	6.17721	6.02928e-06	0.000224597	3.99489	PHF21A
6420446	-0.709865	10.9572	-5.9715	9.32708e-06	0.000313841	3.56206	S100A10
6480368	-0.709525	11.3251	-2.90705	0.00900242	0.0828703	-3.16905	C17orf27
6280154	0.709464	9.33004	3.97248	0.000808639	0.0112198	-0.84503	IL10RB
520333	0.709291	10.2533	5.87129	1.1558e-05	0.000368274	3.34931	MAPK1
6330255	0.709223	9.00464	5.05672	6.89498e-05	0.00152867	1.57913	SEC14L1
650386	0.709014	7.4395	5.64162	1.89817e-05	0.000543746	2.85723	FLJ10357
6760048	-0.708754	9.99577	-1.95237	0.065706	0.361554	-4.99244	MT2A
7610189	-0.708333	13.2543	-11.4865	5.06763e-10	4.25393e-07	13.1715	RPL12
2340563	-0.708155	9.39506	-7.69055	2.89036e-07	2.38918e-05	7.00254	FBL
7200068	0.707947	10.3813	5.62849	1.95311e-05	0.000556414	2.82893	RGL2
6900343	-0.707743	10.7488	-6.40585	3.73617e-06	0.000153764	4.46958	NDUFB8
1570553	0.707294	11.1292	6.6928	2.06924e-06	9.80006e-05	5.0554	DHRS8
6960707	0.707277	8.7502	7.99894	1.61618e-07	1.59933e-05	7.57564	CCPG1
7380646	0.707187	8.58293	8.36634	8.21924e-08	1.00798e-05	8.2408	DDIT3
3170041	-0.706349	9.04169	-4.38908	0.000311868	0.00518808	0.0895214	MGC11257
1470408	-0.705887	10.4921	-11.2136	7.58123e-10	5.27635e-07	12.7874	YWHAQ
3120079	0.705596	7.69379	6.57555	2.63082e-06	0.000118489	4.81738	TOPORS
5130162	-0.70518	8.19018	-3.87628	0.00100789	0.0135219	-1.06016	MCOLN2
7160528	0.704967	10.466	7.02631	1.05576e-06	5.82955e-05	5.72197	MAEA
650709	-0.70486	8.2498	-4.95774	8.60568e-05	0.00183043	1.35988	SLC2A6
6400079	-0.704319	14.6806	-1.42572	0.170087	0.603101	-5.79336	HBG2
6650215	0.704013	12.5223	7.54522	3.81806e-07	2.89691e-05	6.72774	LYN
2140347	-0.703889	11.1737	-8.94539	2.93301e-08	5.13668e-06	9.25088	CD48
290279	-0.703657	8.9117	-2.44121	0.0245389	0.181873	-4.10569	FCRLM1
1240044	0.703303	6.88745	4.01063	0.000740985	0.0104569	-0.759587	CEACAM6
3140603	0.70291	7.40958	5.75547	1.48316e-05	0.000447123	3.10193	ARHGAP24
4490138	0.70287	8.84946	8.2595	9.9871e-08	1.14092e-05	8.04933	RAB27A
240025	-0.702862	9.95428	-5.44989	2.88551e-05	0.000754899	2.44196	CENPB
1940035	0.702769	8.75197	6.86551	1.45768e-06	7.40099e-05	5.40252	FADD
110576	0.70271	9.02861	8.1365	1.2521e-07	1.33237e-05	7.82692	PPFIA1
4040148	0.702021	8.23004	7.14897	8.27426e-07	4.91879e-05	5.96317	LOC645649
770458	-0.701986	10.046	-8.82617	3.61365e-08	6.0047e-06	9.0467	ECH1
6280427	0.701735	7.43859	9.72476	7.82167e-09	2.41021e-06	10.5389	MAPK14
7550519	0.70153	7.67491	2.52439	0.0205954	0.15871	-3.94404	FLJ11151
1660397	0.701266	7.66545	6.20461	5.69118e-06	0.000214629	4.05214	NEDD9
6350452	0.700965	10.0916	3.62875	0.00177492	0.021696	-1.61089	APAF1
4730100	0.700586	10.9743	5.33693	3.70006e-05	0.000921457	2.19553	LOC440093
4070551	0.700404	9.85961	6.21011	5.62567e-06	0.000212653	4.06363	PPM1F
7650672	0.700273	11.7701	5.55821	2.27636e-05	0.000622287	2.67705	NOLA3
360577	0.699869	11.8411	5.06445	6.77686e-05	0.00150796	1.59623	SOD2
510672	0.699413	7.74323	10.5047	2.23585e-09	1.08857e-06	11.75	MYBPC3
3440431	0.699093	9.94797	9.61469	9.38572e-09	2.72002e-06	10.3619	CHIC2
1110575	-0.697824	9.25791	-7.4957	4.2006e-07	3.1176e-05	6.63343	ABLIM1
870148	0.69762	9.04618	7.33066	5.78853e-07	3.87656e-05	6.31654	FNDC3B
6400369	-0.697484	8.10942	-2.9136	0.00887351	0.0818849	-3.1554	MAF
1710100	-0.69696	9.60759	-8.58397	5.55219e-08	7.90407e-06	8.62587	ARHGAP17
1260156	0.69657	7.55347	7.63957	3.18579e-07	2.53442e-05	6.90649	KIAA0232
1690196	0.696144	11.279	5.15299	5.56268e-05	0.00128844	1.79166	P2RY13
6200333	-0.696081	7.90967	-6.81835	1.60336e-06	8.02292e-05	5.30816	FLJ14213
6350376	-0.695507	11.5297	-6.61599	2.42123e-06	0.000110688	4.89969	HSPA8
770603	0.693077	8.02139	8.76463	4.02748e-08	6.42974e-06	8.94053	FAM49A
610603	-0.692908	9.42032	-9.32216	1.53414e-08	3.61006e-06	9.88359	PIGY
5550333	0.692592	8.47166	6.71909	1.96127e-06	9.35366e-05	5.10851	LAT2
4890068	0.692479	7.50399	3.71007	0.00147412	0.0185204	-1.43051	LOC644935
1170767	0.692111	9.37377	4.15773	0.000529126	0.00797078	-0.429746	HIST1H1C
10240	0.691762	7.32384	7.74015	2.6301e-07	2.24259e-05	7.09564	TGFA
1990706	-0.691679	8.6662	-5.75025	1.5e-05	0.000451363	3.09073	MT1X
4730612	-0.691555	11.5927	-8.5709	5.68357e-08	8.02075e-06	8.60293	RPS17
1190647	-0.690535	9.24775	-7.41148	4.94513e-07	3.487e-05	6.4722	APEX1
4590242	0.690279	12.9383	7.22508	7.12024e-07	4.41609e-05	6.11177	TALDO1
620343	0.690092	7.90977	4.44041	0.000277428	0.00472109	0.204677	SLPI
1500768	-0.689825	9.15655	-5.44054	2.9454e-05	0.00076645	2.4216	DPYSL2
6590523	-0.689788	9.51514	-4.70923	0.00015066	0.00288559	0.806542	GIMAP6
7050167	-0.689244	12.3709	-7.08133	9.46195e-07	5.45176e-05	5.83043	EIF3S6
2900626	0.689224	8.6966	3.52097	0.00226905	0.0265945	-1.8489	HN1
3130300	-0.688799	11.389	-6.76527	1.78548e-06	8.80976e-05	5.20156	ATP5A1
5090088	0.688698	9.57783	9.1386	2.09915e-08	4.28685e-06	9.57772	GMIP
2070377	0.688653	7.79167	6.95022	1.22934e-06	6.52701e-05	5.57126	FBXL5
4760162	0.688245	8.36262	6.99271	1.12905e-06	6.11456e-05	5.65553	ELL
6110386	-0.687562	11.5074	-6.05359	7.83169e-06	0.000275507	3.73542	C17orf45
2070451	0.687423	12.9767	6.04925	7.90419e-06	0.000276141	3.72628	CD97
6980082	-0.687311	9.59729	-9.99601	5.02109e-09	1.86612e-06	10.9687	RPL22
2060482	0.687045	8.81463	6.3451	4.23997e-06	0.000169345	4.34412	SLC16A5
5490687	-0.686476	10.4204	-6.99818	1.11678e-06	6.07516e-05	5.66634	DARS
5290494	-0.685765	9.88001	-6.45915	3.34501e-06	0.000142111	4.57925	CNDP2
4040296	-0.685437	8.01034	-5.1401	5.72469e-05	0.00131844	1.76324	STK39
7320246	0.684661	9.19116	6.36962	4.02869e-06	0.000162776	4.39482	ELF2
2680273	0.684645	8.33553	1.64328	0.116683	0.502664	-5.48503	ZFP36L1
5570414	0.683939	8.38984	5.68234	1.73754e-05	0.000507778	2.94491	CD163
5910129	-0.683841	9.79237	-2.7749	0.0120237	0.104408	-3.44196	GMPR
7400221	-0.682983	12.9077	-12.9306	6.74813e-11	1.8688e-07	15.0733	LOC653232
1940519	0.68242	7.47333	9.12384	2.15314e-08	4.31398e-06	9.55293	DGAT2
4150161	0.681002	8.67937	6.86759	1.45157e-06	7.3848e-05	5.40668	CD58
5700136	0.680697	8.02941	4.81128	0.000119638	0.0024048	1.03421	SMCHD1
4060703	-0.679973	8.50128	-7.42028	4.86135e-07	3.47003e-05	6.48909	MRPL41
2320041	-0.679639	8.42687	-9.07858	2.32786e-08	4.55166e-06	9.47673	ELP3
1050315	0.679411	9.8379	6.5148	2.98151e-06	0.000130893	4.69332	OBFC2A
3420341	-0.679104	9.10241	-6.5569	2.7337e-06	0.000122331	4.77935	RRM1
4200543	0.678789	7.38929	2.50668	0.0213814	0.163524	-3.97868	ANKRD22
4640132	-0.678541	9.61085	-6.41875	3.63734e-06	0.000150945	4.49616	MIF
1050474	-0.678514	12.907	-7.32526	5.85001e-07	3.8963e-05	6.30609	RPS13
7050719	-0.678488	10.5714	-3.65483	0.00167235	0.020634	-1.55311	C9orf78
7330224	-0.678325	9.09517	-6.19781	5.77322e-06	0.000216883	4.03794	C14orf112
4060131	-0.67743	10.1137	-10.6273	1.84744e-09	9.36943e-07	11.9337	LPXN
4040132	-0.676809	8.47312	-5.95715	9.61728e-06	0.00032137	3.53166	ORMDL3
7400431	-0.676733	9.49785	-8.17313	1.17032e-07	1.27186e-05	7.89339	ILF2
5820072	0.676364	10.7739	5.54056	2.36583e-05	0.000640272	2.63883	PPP1R15A
7040475	-0.676082	9.62327	-6.46748	3.28788e-06	0.000140647	4.59633	NDUFS3
6040332	0.675785	7.69975	2.91639	0.00881906	0.0815215	-3.14958	MTMR6
60128	0.675185	7.91436	6.08099	7.38927e-06	0.00026385	3.79311	GDPD3
1820373	-0.67515	10.8529	-7.3332	5.75993e-07	3.86957e-05	6.32144	TRAM1
5860189	0.674311	9.42355	3.66551	0.00163208	0.0202088	-1.52944	CNIH4
7610438	0.674309	8.87716	10.1392	3.98707e-09	1.64799e-06	11.1918	SLCO3A1
1340368	-0.674263	12.4106	-3.51512	0.00229948	0.0268799	-1.86179	LOC644039
6060441	0.673901	7.68265	3.67563	0.0015948	0.0198026	-1.50699	OR10G3
4290202	-0.673555	9.70519	-5.55294	2.30272e-05	0.000627379	2.66563	RPS23
5360541	0.673417	9.7216	6.274	4.91947e-06	0.000191458	4.19669	TCIRG1
5290050	-0.673271	9.22795	-4.96436	8.47887e-05	0.00180869	1.37456	IL11RA
6220367	-0.673175	9.0311	-9.09183	2.27526e-08	4.48706e-06	9.49905	EPRS
20634	-0.672564	8.95501	-6.91007	1.33255e-06	6.93137e-05	5.49142	SNRPA1
4760543	-0.671689	9.89045	-5.50823	2.53917e-05	0.000677534	2.56872	NUP62
240333	0.67115	7.92626	9.41003	1.32222e-08	3.28442e-06	10.0284	PDK3
4010020	0.670396	8.93694	6.7154	1.97607e-06	9.40458e-05	5.10106	SLC15A4
1070189	0.669931	7.66694	6.95509	1.21739e-06	6.49192e-05	5.58093	PHTF1
1230706	0.669503	10.0044	5.17351	5.31449e-05	0.00124397	1.83686	M6PRBP1
6580215	0.669206	9.86364	4.75292	0.000136486	0.00267193	0.904086	GRAMD1A
6330669	0.668966	11.0114	7.078	9.52474e-07	5.46853e-05	5.82388	ZCCHC6
510301	-0.668812	8.76424	-6.26671	4.99521e-06	0.000193941	4.18153	GPD1L
940113	-0.668613	9.02876	-6.75143	1.8364e-06	8.9478e-05	5.1737	TOMM22
6590706	-0.668497	10.7833	-2.8971	0.00920177	0.0843227	-3.18977	LOC645656
3190010	0.668137	8.93486	3.22097	0.00447441	0.0470509	-2.50302	FTH1
7320619	0.668135	8.26543	6.35756	4.13119e-06	0.000165953	4.3699	GLT1D1
1990707	-0.668018	9.21314	-6.34871	4.20816e-06	0.000168536	4.35159	C16orf58
4780521	-0.667953	8.17399	-12.2812	1.63276e-10	2.64981e-07	14.2443	CYB5A
160682	-0.667907	8.64213	-6.97547	1.16867e-06	6.27334e-05	5.62137	SF3B3
3290044	0.667232	7.54431	10.0973	4.26446e-09	1.688e-06	11.1268	LOC400924
940132	0.667067	8.35414	5.56823	2.22709e-05	0.000613606	2.69875	KIAA1961
6350309	0.666717	8.58036	6.51823	2.96049e-06	0.000130313	4.70034	MAP2K4
50133	-0.666598	9.26828	-7.73454	2.65829e-07	2.25477e-05	7.08512	LSM7
60598	0.666325	8.67882	10.6854	1.68882e-09	8.84122e-07	12.02	ANKS1A
4250296	0.665971	8.30517	7.2636	6.60105e-07	4.21642e-05	6.18666	ABCA7
2450014	0.665928	7.27835	3.86297	0.00103907	0.0138714	-1.08988	LOC646064
7320709	-0.665576	11.5263	-2.31596	0.0318262	0.221234	-4.34372	LOC653328
4540414	-0.665428	11.9181	-4.25013	0.000428332	0.00672267	-0.222368	RPS18
1500437	-0.665418	12.9	-7.38724	5.18377e-07	3.57334e-05	6.42562	RPL3
1240138	-0.66533	9.88565	-9.03825	2.49599e-08	4.66619e-06	9.4086	hfl-B5
2900035	0.665182	10.4391	6.53008	2.88901e-06	0.000127754	4.72457	SNX27
360056	0.664618	10.1565	7.61607	3.33237e-07	2.62105e-05	6.86209	NRD1
70242	0.66446	12.1232	7.6456	3.14929e-07	2.5136e-05	6.91786	LAPTM5
1190279	0.664001	11.5873	6.62767	2.36394e-06	0.000108681	4.92342	CASP4
3930368	-0.663833	9.47816	-5.79956	1.34858e-05	0.000413986	3.19628	GTPBP6
6760154	-0.663654	9.22617	-7.8058	2.32253e-07	2.05595e-05	7.2183	RSL1D1
4260672	0.663617	8.90393	7.49106	4.23841e-07	3.13134e-05	6.62458	YIPF1
2690333	0.663555	8.8383	2.07328	0.0519104	0.311021	-4.78429	ELOVL5
2320070	-0.663472	7.62089	-3.44729	0.00268276	0.0305319	-2.0108	CTSL
840022	0.663452	7.25262	4.93405	9.07572e-05	0.00191037	1.30729	LOC643011
7550537	-0.662973	11.3804	-6.46655	3.29421e-06	0.000140689	4.59443	SLC25A5
4010053	-0.662546	8.97117	-2.25349	0.036167	0.242729	-4.45985	HLA-DRB3
1570300	-0.662532	13.2276	-6.59421	2.53187e-06	0.000114669	4.85539	RPS20
1660646	0.662164	9.32754	8.16011	1.19874e-07	1.2969e-05	7.86978	NSMAF
2630189	0.662053	9.20469	5.15524	5.53493e-05	0.00128323	1.79662	FFAR2
5890494	0.661559	9.13991	6.78304	1.72224e-06	8.5301e-05	5.23729	HBP1
3990646	0.661236	7.20968	4.87497	0.000103647	0.00212922	1.176	HEY1
5360609	0.661109	8.71835	8.53182	6.096e-08	8.33697e-06	8.53421	STAT3
4230615	-0.660565	12.2967	-3.99833	0.000762163	0.0107061	-0.787152	LOC643284
2030612	0.660385	7.43035	4.20697	0.00047276	0.00726326	-0.319247	COL9A2
6940242	-0.660103	10.8141	-5.37239	3.4218e-05	0.000860524	2.273	HDAC1
5130471	-0.659768	8.69741	-7.00722	1.09679e-06	5.98648e-05	5.68423	C22orf16
6760025	-0.659757	11.0992	-2.38055	0.0278487	0.200059	-4.22181	LOC653341
360136	0.659523	9.82451	7.20134	7.46121e-07	4.55789e-05	6.0655	TBL1X
6760487	-0.659459	11.1342	-7.93574	1.81879e-07	1.74314e-05	7.4593	FXYD5
5900356	0.659318	9.30213	9.68539	8.34738e-09	2.51076e-06	10.4758	RHOT1
5310520	-0.658887	9.01776	-4.79734	0.000123461	0.00245946	1.00315	C17orf61
2030463	-0.658865	9.88488	-7.04707	1.01297e-06	5.70154e-05	5.76293	NDUFS5
4210239	-0.658783	8.4979	-8.47688	6.72926e-08	8.94178e-06	8.43721	MRPL24
4220148	0.658712	7.08473	5.89183	1.10597e-05	0.000355423	3.39302	LOC642112
870553	0.658602	9.01823	4.11309	0.000586036	0.00866191	-0.529887	NIN
3890128	-0.658307	8.35139	-8.2301	1.05398e-07	1.17695e-05	7.99637	LAT
6770669	0.658038	7.18655	6.3904	3.85816e-06	0.000157059	4.43771	EFCBP2
2320377	-0.657678	9.01449	-5.52377	2.45426e-05	0.00065944	2.60244	LOC642755
1030201	-0.657671	10.2536	-5.77407	1.42478e-05	0.000431663	3.14176	NDUFB11
610370	-0.65762	11.4866	-7.55625	3.73788e-07	2.85244e-05	6.7487	ATP5O
60673	0.657353	8.71015	7.54267	3.83683e-07	2.89691e-05	6.7229	MLF2
7040180	0.657296	8.26845	6.61917	2.40546e-06	0.000110246	4.90616	PFC
2640156	-0.657177	8.81953	-4.81288	0.000119209	0.00239732	1.03777	IL27RA
6900341	0.65683	8.36209	6.74588	1.85722e-06	9.0152e-05	5.16253	SORT1
2600475	0.656745	7.6398	4.07115	0.000645107	0.00936444	-0.623964	IL6R
2030482	0.656719	8.60608	5.73085	1.56423e-05	0.000466911	3.04914	RPS6KA5
3610703	-0.656529	9.84594	-5.08955	6.40747e-05	0.0014396	1.6517	P2RY8
840201	-0.656042	8.85974	-6.55396	2.75028e-06	0.000122847	4.77336	ATP6V0E2L
3890735	-0.655904	8.21458	-7.15828	8.12319e-07	4.85269e-05	5.9814	DYRK2
5810025	-0.655509	9.17776	-7.16059	8.0862e-07	4.83652e-05	5.98592	YARS
3420747	0.655239	8.07366	5.30061	4.00919e-05	0.000986734	2.11602	CDC42EP2
3170167	-0.654957	8.31094	-5.79004	1.37653e-05	0.00042071	3.17593	CLEC2D
2490747	-0.654792	9.2641	-4.82125	0.000116979	0.00236224	1.05642	AARS
5910139	-0.654772	8.99804	-8.38368	7.96444e-08	9.87194e-06	8.27173	PRMT1
5390100	0.654337	7.96431	5.55364	2.29917e-05	0.000626762	2.66716	RRM2B
4070286	0.654214	9.215	5.70309	1.66111e-05	0.000489556	2.98953	ZBTB34
7560615	0.653208	7.33508	9.69958	8.1538e-09	2.49675e-06	10.4986	EGFL5
5670050	-0.65295	9.35753	-6.1292	6.67238e-06	0.000243704	3.89435	ZDHHC8
540634	-0.652586	7.5966	-5.1593	5.48518e-05	0.00127449	1.80556	HLA-DPB1
1990070	-0.652179	9.91832	-8.29988	9.27651e-08	1.09062e-05	8.12189	HNRPAB
580537	-0.651735	8.66594	-6.88952	1.3888e-06	7.14008e-05	5.45047	CARD11
3130670	-0.651622	10.1211	-7.43983	4.68035e-07	3.38874e-05	6.52658	COMMD3
450037	-0.651179	8.40662	-11.1467	8.37772e-10	5.74488e-07	12.6919	LY9
7100463	-0.649601	10.3148	-4.94614	8.83263e-05	0.00186809	1.33414	LOC653438
3780162	-0.649362	9.49426	-6.0847	7.33133e-06	0.000262071	3.80092	ATP5D
5720605	-0.649284	8.28609	-6.51961	2.95203e-06	0.000130186	4.70317	SNURF
4230463	0.648973	8.75503	5.79035	1.3756e-05	0.00042071	3.1766	PRO0149
4540468	-0.648815	10.3506	-8.53269	6.08649e-08	8.33697e-06	8.53574	G3BP
6480647	0.648658	8.50496	3.9498	0.000851744	0.0116978	-0.895789	ARFIP1
110025	-0.648564	10.3343	-1.76258	0.0939637	0.44762	-5.30205	LOC388654
1980538	0.648231	9.02541	8.26714	9.8483e-08	1.13086e-05	8.06309	ZFP106
4180402	0.648061	7.72278	4.61511	0.000186477	0.00342733	0.596103	dJ341D10.1
1070427	-0.64786	8.9538	-5.55654	2.28469e-05	0.000623309	2.67343	BEXL1
5310220	-0.647635	12.3615	-5.72212	1.59405e-05	0.000473516	3.03041	LOC642770
7320576	-0.647527	9.75802	-9.3739	1.4054e-08	3.45579e-06	9.969	EIF3S2
1570129	-0.647388	10.4184	-4.96402	8.48527e-05	0.00180869	1.37381	COX5A
3610598	0.647285	9.4502	7.0267	1.05494e-06	5.82955e-05	5.72274	SLC43A2
840367	-0.647218	8.60013	-4.76245	0.00013358	0.00262031	0.92534	REXO4
3940446	0.646805	8.36327	2.27395	0.0346891	0.235886	-4.42203	EVI2A
6060717	0.645989	8.46815	5.578	2.18014e-05	0.000605501	2.71988	AHCTF1
1770286	0.645803	8.20946	6.64275	2.29207e-06	0.000105977	4.95403	TPCN2
1770685	-0.645711	8.05948	-7.59948	3.44006e-07	2.67123e-05	6.83069	ST3GAL5
1780537	-0.645626	10.8126	-3.51101	0.00232108	0.0270934	-1.87084	NRGN
5220397	-0.645393	10.4123	-4.70939	0.000150605	0.00288559	0.806897	TSPAN32
3390021	0.645265	7.45971	3.76433	0.00130215	0.0166969	-1.30983	MEFV
2340187	0.645103	8.17649	9.31887	1.54275e-08	3.61115e-06	9.87814	DGCR2
840050	0.644945	7.0905	4.4081	0.000298633	0.00501536	0.132188	GPX3
5870673	0.644724	9.38095	2.34704	0.0298504	0.210872	-4.28528	NMI
510128	-0.644249	7.94923	-2.85977	0.00998843	0.0900235	-3.26728	DUSP5
1990538	-0.644141	8.76992	-7.93069	1.83607e-07	1.75624e-05	7.44998	SSB
3840364	-0.644124	8.32881	-9.14177	2.08775e-08	4.28685e-06	9.58303	GLO1
2070152	0.643966	10.6604	8.66494	4.80568e-08	7.31665e-06	8.76745	CMTM6
2710278	-0.643636	9.03644	-6.0414	8.037e-06	0.000279898	3.70975	SHMT2
130075	-0.643081	8.97452	-6.04759	7.9321e-06	0.000276839	3.72278	MRPS24
2640088	0.642845	8.14346	2.7612	0.0123875	0.106972	-3.46995	CIR
2100441	-0.642385	11.0904	-5.86415	1.17365e-05	0.0003725	3.3341	QARS
2060440	-0.642367	9.08014	-3.80467	0.00118737	0.0154695	-1.21996	SNRPF
1430347	-0.641807	10.2251	-2.84008	0.0104288	0.0931813	-3.30798	LOC648314
1030041	0.641607	7.72248	8.74015	4.20558e-08	6.64796e-06	8.89815	CARD12
2760358	0.641165	12.0088	2.22747	0.0381315	0.251874	-4.50769	ITM2B
3830138	0.641055	7.72284	1.96042	0.0646951	0.3583	-4.97884	OSBPL8
7160669	0.640796	10.4942	5.94486	9.87306e-06	0.000327076	3.50562	APBB1IP
270102	-0.640544	8.90049	-4.78393	0.000127254	0.00252265	0.973251	LEF1
6760286	0.639978	9.55991	8.32806	8.81189e-08	1.05411e-05	8.17239	UBR2
6580753	0.639889	6.982	6.67778	2.13366e-06	0.000100272	5.02501	LIN7A
2000025	-0.639469	12.1757	-6.82165	1.59268e-06	7.97766e-05	5.31478	RPL26
2970468	-0.639447	10.5674	-7.77573	2.45848e-07	2.14125e-05	7.1622	EIF3S7
7380056	0.639095	9.68352	6.3634	4.08121e-06	0.000164397	4.38197	TP53INP1
5050424	-0.638848	10.5827	-1.46885	0.158148	0.585223	-5.73496	LOC652493
1300634	-0.638726	10.8583	-5.66527	1.80312e-05	0.000523173	2.90817	NDUFS6
5870291	0.63868	7.43801	5.59224	2.11353e-05	0.000590887	2.75065	LOC642780
2710392	-0.638119	9.07697	-6.53863	2.8385e-06	0.000125978	4.74206	NOL1
7320136	0.637732	9.094	8.15893	1.20135e-07	1.2969e-05	7.86764	PHF20L1
3890682	-0.637684	8.57002	-2.34927	0.0297137	0.210089	-4.28109	SH2D2A
4560025	0.637548	11.3037	7.43054	4.76547e-07	3.42713e-05	6.50877	TPD52L2
3850082	-0.637412	8.43722	-7.32279	5.87828e-07	3.90978e-05	6.30133	BCL2
5890747	-0.637384	9.10659	-6.72686	1.93046e-06	9.30528e-05	5.1242	ARL2
4670092	-0.637162	10.0366	-3.55315	0.00210878	0.025115	-1.77798	ID2
150192	-0.637161	8.9461	-12.3581	1.46766e-10	2.59668e-07	14.3447	DDX47
4390370	-0.636977	7.24974	-3.45129	0.00265852	0.0303198	-2.00204	C1QA
4150431	0.636726	7.99425	4.64739	0.00017331	0.00323046	0.66833	LOC653371
2470187	-0.636517	10.7173	-4.6185	0.000185046	0.0034036	0.603701	SNRPG
4050243	-0.635468	9.20324	-7.22209	7.16224e-07	4.42523e-05	6.10595	CLNS1A
290452	-0.635008	7.76705	-3.03329	0.00680815	0.0661614	-2.90395	TPM2
1690537	-0.634445	8.21343	-8.36136	8.29382e-08	1.01458e-05	8.23192	RPUSD2
5960128	-0.634401	10.2115	-4.25	0.00042846	0.00672267	-0.222662	TAF15
4010136	0.634359	7.01189	6.0101	8.59039e-06	0.000294121	3.64369	LOC399715
2570497	-0.634155	9.62931	-9.09091	2.27887e-08	4.48706e-06	9.4975	TMC6
1770347	-0.63412	9.08092	-6.57429	2.63764e-06	0.000118686	4.81482	DC2
6590154	0.633494	8.19705	8.65714	4.87276e-08	7.3677e-06	8.75386	WIPI1
2680725	0.633139	8.86546	7.14481	8.3426e-07	4.94132e-05	5.95503	CUEDC1
2480762	-0.633135	13.5976	-6.10019	7.09468e-06	0.000255487	3.83347	LOC649564
6420079	-0.632788	9.24479	-4.25409	0.000424465	0.00667073	-0.213462	DKFZp761P0423
2900672	-0.632719	9.47758	-8.40149	7.71143e-08	9.77725e-06	8.30344	TOMM20
5420452	0.632244	8.09939	7.5038	4.1354e-07	3.0786e-05	6.64888	FLJ39639
60091	0.631314	9.28472	1.88584	0.0746161	0.390711	-5.10345	C1orf63
1820767	0.631151	9.61859	7.71831	2.7416e-07	2.30138e-05	7.05468	RERE
7400181	-0.630761	8.76149	-9.74685	7.54201e-09	2.35383e-06	10.5743	MRPL3
7550070	-0.630759	8.90079	-5.61412	2.01514e-05	0.000570511	2.79792	ATP5G1
6290639	-0.630746	8.51601	-3.06742	0.00631005	0.0622275	-2.8316	MTP18
5890327	-0.630382	8.67312	-7.84556	2.1546e-07	1.94621e-05	7.2923	AKR1B1
4760064	-0.630307	8.17452	-2.51485	0.0210153	0.161155	-3.96271	PF4V1
6960397	0.630289	10.4848	5.34112	3.666e-05	0.000914847	2.20469	NOTCH1
4050056	0.630086	7.47078	8.462	6.91221e-08	9.12018e-06	8.41088	LOC402176
4200152	-0.630057	7.41743	-1.82714	0.0833447	0.416906	-5.19919	LOC652775
2970537	-0.629993	13.3498	-7.85141	2.13097e-07	1.93204e-05	7.30318	RPL18A
4180369	-0.629813	8.8475	-2.67049	0.0150743	0.124944	-3.65383	RIS1
1340600	-0.6298	7.38668	-7.40536	5.00432e-07	3.50841e-05	6.46044	MGC10992
5050678	-0.629513	9.53795	-6.88291	1.40744e-06	7.21835e-05	5.43726	XPNPEP1
3360546	0.62945	7.52771	4.69215	0.0001566	0.00296784	0.768375	ANP32A
2000753	-0.629391	10.6556	-8.20441	1.10487e-07	1.20883e-05	7.94999	EDF1
2190445	-0.629181	9.10814	-4.54602	0.000218155	0.00390223	0.441419	NDUFB7
2650390	-0.628994	8.43737	-8.38282	7.97698e-08	9.87194e-06	8.27019	PLCG1
6520497	-0.628694	10.8119	-3.58531	0.00195978	0.0235886	-1.70698	ACTG1
3830142	-0.628541	12.136	-11.3102	6.56841e-10	5.07613e-07	12.9243	RPL24
2350195	0.628538	7.03836	4.96621	8.44383e-05	0.00180388	1.37866	SLC36A4
380541	0.628045	8.00737	9.78869	7.04044e-09	2.26868e-06	10.6411	SPAG9
60280	-0.627739	7.96881	-10.0061	4.94009e-09	1.85014e-06	10.9845	CD3E
6590020	-0.626997	9.14334	-3.32644	0.00352758	0.038491	-2.27468	PIK3R1
1780477	-0.626874	8.51215	-1.94698	0.0663911	0.363475	-5.00153	TMOD1
6620196	0.626868	7.6538	4.9329	9.09909e-05	0.00191199	1.30475	EVA1
4180187	0.626712	7.80751	3.00809	0.0072001	0.069115	-2.95719	C9orf72
7050280	-0.626645	7.65316	-9.68049	8.41534e-09	2.51361e-06	10.4679	GPR18
4260575	0.625798	7.52105	3.47119	0.002541	0.0292398	-1.95836	HIST1H2BC
7610097	0.625557	8.09465	5.03311	7.26879e-05	0.00159897	1.52689	ABCC5
1070068	0.625532	7.21509	6.55996	2.71655e-06	0.000121787	4.7856	UBTD1
780458	-0.625015	11.4745	-5.84019	1.23564e-05	0.000387128	3.28304	ANP32B
3780689	0.624878	8.28852	2.4307	0.0250849	0.184879	-4.12593	NT5C3
5390494	0.624768	9.40811	4.3481	0.00034244	0.00557791	-0.00245369	MAP3K5
7560202	-0.624275	8.82383	-8.15227	1.21619e-07	1.31002e-05	7.85556	C1QBP
1990500	-0.624162	10.7339	-9.91577	5.71958e-09	1.98907e-06	10.8426	DNCL1
3940142	-0.623953	10.3439	-6.67582	2.14222e-06	0.000100577	5.02105	C14orf156
5420376	-0.623109	9.27138	-7.37855	5.27232e-07	3.60524e-05	6.40888	GPI
7200731	0.623034	11.0143	4.34359	0.000345981	0.00563371	-0.0125684	SLC12A9
6060730	0.622798	7.71179	7.22286	7.1514e-07	4.42414e-05	6.10745	GALNACT-2
780500	-0.62279	9.45122	-4.65696	0.00016959	0.00317205	0.689735	COMT
5290634	0.62225	10.6003	4.5394	0.000221461	0.00395534	0.426598	DPEP2
4050239	-0.621419	10.1489	-2.26833	0.0350895	0.237973	-4.43244	EPB42
6940544	0.62138	9.06249	8.80759	3.73374e-08	6.14137e-06	9.01469	PIAS1
1740341	-0.621281	9.77479	-1.5432	0.139185	0.551474	-5.63107	BIRC4BP
5550360	-0.620937	7.92044	-7.60347	3.41381e-07	2.66359e-05	6.83825	TRAT1
830091	0.620841	8.13676	7.0487	1.00967e-06	5.69514e-05	5.76616	PRKCZ
2030593	0.620445	12.065	6.87984	1.41615e-06	7.24034e-05	5.43115	EVI2B
780678	0.620341	9.89107	4.37956	0.000318719	0.00527985	0.0681456	EDG6
5390255	0.620073	10.3322	8.29907	9.29022e-08	1.09062e-05	8.12044	RBM23
4890114	0.619692	7.39861	5.14236	5.69591e-05	0.00131347	1.76823	FLJ13639
650349	0.618915	7.68186	6.17136	6.10403e-06	0.000226687	3.98267	POR
2100026	0.618716	8.20231	9.6327	9.1091e-09	2.68785e-06	10.3909	ZNF20
990224	-0.618254	8.3445	-8.38588	7.93281e-08	9.87194e-06	8.27564	UBQLN4
2000551	0.618154	11.9478	7.29384	6.2209e-07	4.05458e-05	6.24531	CKLF
5490445	-0.618006	10.8031	-11.5641	4.5252e-10	4.25393e-07	13.2792	EIF3S12
6380601	-0.61795	9.55088	-5.25908	4.39521e-05	0.00106304	2.02496	NAT5
6450543	0.617948	8.14055	4.2288	0.00044973	0.00698437	-0.270229	NS4ATP2
1300292	-0.61766	8.50472	-8.01784	1.56026e-07	1.55284e-05	7.61033	PRMT7
160470	-0.617307	8.06619	-7.58195	3.55771e-07	2.74943e-05	6.79748	ZNF22
5690008	-0.617299	9.77286	-5.13089	5.84334e-05	0.00134006	1.74293	SAE1
430132	0.617264	8.46926	6.10774	6.98224e-06	0.000252184	3.84932	IBRDC3
1820044	-0.617023	12.7386	-8.78866	3.86035e-08	6.26496e-06	8.98204	RPS27A
1110600	0.615869	8.66303	6.14058	6.51377e-06	0.00023809	3.91822	EIF4E3
1770279	-0.615651	9.31186	-8.99594	2.68605e-08	4.83522e-06	9.33688	ARPC5L
7550634	-0.615328	13.1453	-6.4236	3.60091e-06	0.000149716	4.50615	LOC645296
2140672	0.615156	10.979	4.36695	0.000328023	0.00539724	0.0398453	IMPDH1
4040360	0.615074	10.9871	8.2917	9.416e-08	1.09152e-05	8.10722	BRI3
630524	0.614766	6.71435	5.98631	9.03705e-06	0.000306398	3.5934	DAAM2
7150711	-0.614587	10.7141	-4.69587	0.000155286	0.00294753	0.776688	SFRS6
1400047	0.614318	8.53422	6.01913	8.42685e-06	0.000290359	3.66276	SHKBP1
5550719	0.613643	8.56643	2.98654	0.00755261	0.0717911	-3.0026	SERINC1
1580181	0.613565	12.2768	3.85604	0.00105569	0.0140586	-1.10536	TKT
3130220	0.613535	7.44662	4.18998	0.000491487	0.00750597	-0.357366	RPGR
4810364	-0.613521	9.26712	-6.31678	4.49826e-06	0.000177621	4.28547	DENND2D
6130154	-0.613197	9.47813	-5.54316	2.35243e-05	0.000637002	2.64446	NP
6590397	0.613128	9.19764	2.91927	0.00876328	0.0811291	-3.14357	ATHL1
1400270	-0.61298	9.30486	-6.57239	2.64795e-06	0.00011904	4.81095	PCSK7
3370687	-0.612961	8.94988	-7.42353	4.83077e-07	3.45368e-05	6.49532	SCAMP3
270730	0.612837	7.30801	7.76385	2.51445e-07	2.17444e-05	7.14	C1orf38
4900053	-0.612513	10.0063	-6.88254	1.40847e-06	7.21835e-05	5.43654	SIAHBP1
5890674	0.612309	10.5462	5.97148	9.3275e-06	0.000313841	3.56202	RPS6KA1
4280139	-0.612214	9.82345	-7.43629	4.71262e-07	3.40209e-05	6.51979	LSM2
3610440	0.612095	7.49148	2.95823	0.00804097	0.0755191	-3.06206	LOC644532
3140066	-0.61186	9.64796	-5.68153	1.74059e-05	0.000508363	2.94318	CDKN1A
7050228	0.611534	7.2325	6.1127	6.90921e-06	0.000250475	3.85975	CITED4
6420402	0.611392	7.27999	7.07663	9.55089e-07	5.47064e-05	5.82117	LOC152195
7050291	-0.611186	13.5401	-8.68226	4.66003e-08	7.13467e-06	8.79761	LOC649150
7210497	-0.611112	12.8489	-3.82994	0.00112067	0.0147785	-1.16362	GP1BB
1090500	-0.611064	7.96464	-2.30168	0.0327737	0.225853	-4.37043	KRT1
5900021	-0.610834	9.31373	-5.10858	6.14128e-05	0.001392	1.6937	WDR6
5690441	-0.610572	9.14405	-2.1493	0.0446336	0.280931	-4.64941	SLC4A1
5310184	0.61036	12.0907	7.26252	6.61504e-07	4.21642e-05	6.18456	FGD3
4610097	-0.610242	8.62923	-6.24687	5.20754e-06	0.000200585	4.14024	SDAD1
870575	0.609914	7.30418	2.8468	0.0102765	0.092125	-3.2941	LOC283547
1030121	-0.609871	10.8353	-7.56962	3.64298e-07	2.79673e-05	6.7741	DBI
3420025	0.609847	9.74348	4.62564	0.000182072	0.00335918	0.61968	STAT6
4150348	-0.609558	9.20569	-5.45317	2.86485e-05	0.000750704	2.44908	GPSN2
6180370	0.609441	8.00866	5.67739	1.75629e-05	0.000512027	2.93427	RP2
2360220	-0.608938	9.18901	-5.56985	2.21927e-05	0.000612873	2.70224	PIK3R2
5050241	-0.608927	8.62072	-5.93626	1.00562e-05	0.000331488	3.48739	PRKCQ
1690605	-0.608476	10.37	-4.85073	0.000109462	0.00223079	1.12205	RPS27L
4730195	0.608468	7.95427	4.7729	0.000130464	0.00257266	0.948648	HIST1H4H
1470646	-0.608286	13.2026	-14.0832	1.5309e-11	1.12123e-07	16.4472	RPL19
7550333	-0.608283	8.08651	-5.09109	6.38558e-05	0.00143667	1.65509	FCRL6
6520048	-0.608104	8.04559	-1.88989	0.0740451	0.388599	-5.09677	ITM2C
4050537	0.607859	11.509	7.95251	1.76257e-07	1.71286e-05	7.49023	C20orf43
7570673	0.607795	13.8096	8.32034	8.9367e-08	1.06642e-05	8.15856	LOC645895
5820541	-0.607019	11.1482	-2.04577	0.0547979	0.322304	-4.83237	LOC401206
2810451	0.606802	10.708	6.0609	7.71101e-06	0.000271905	3.75083	FAM8A1
3120220	-0.60666	10.9844	-2.39351	0.0271083	0.195994	-4.19713	LOC646483
6590561	-0.60627	10.2499	-2.59852	0.0175909	0.140779	-3.79775	CCR7
1240201	0.605995	8.79347	7.04498	1.01719e-06	5.71872e-05	5.75881	GMPR2
460685	0.605745	9.1995	5.61292	2.02043e-05	0.000570511	2.79532	ATF6
7150500	0.605276	7.474	6.6336	2.33542e-06	0.000107777	4.93546	FLJ42957
60470	-0.605159	8.58267	-5.44559	2.9129e-05	0.000758859	2.43259	LOC389289
5670097	-0.605115	9.28961	-5.90818	1.0679e-05	0.000347081	3.42778	MRPL23
70639	0.605098	7.48826	5.16359	5.43302e-05	0.00126867	1.81502	ZMYND15
1110228	-0.605084	12.0461	-1.95739	0.0650742	0.359499	-4.98397	SNCA
5290661	0.604948	6.96246	6.2509	5.1636e-06	0.000199208	4.14864	LOC642684
6550762	-0.604873	8.67912	-5.36254	3.49688e-05	0.000878043	2.25149	TYSND1
360114	-0.604819	8.46423	-3.94664	0.000857924	0.0117645	-0.902853	NME1
6100070	-0.604791	12.384	-3.82728	0.00112753	0.0148582	-1.16956	LOC653314
160240	-0.604271	9.57347	-6.03296	8.18262e-06	0.000284156	3.69193	DDX39
1230538	0.604246	10.2428	3.83699	0.00110273	0.014572	-1.14788	NCF1
150154	0.604222	9.38315	5.09021	6.39805e-05	0.00143881	1.65316	H2AFY
6940372	-0.604172	8.83452	-9.19775	1.89658e-08	4.12743e-06	9.67677	DGCR6L
6130576	0.604076	8.20919	6.75288	1.83099e-06	8.9478e-05	5.17662	CXCL1
7650025	0.604039	8.2477	2.21457	0.0391408	0.25693	-4.53128	DSC2
830674	-0.603911	9.36128	-2.32806	0.0310432	0.217093	-4.32103	CD79A
7200482	-0.603177	9.54782	-6.03196	8.19997e-06	0.00028437	3.68983	TIGA1
6380040	0.603166	9.22678	5.61284	2.0208e-05	0.000570511	2.79514	PLEKHQ1
4210427	-0.603064	7.89944	-8.38706	7.91586e-08	9.87194e-06	8.27774	SLAMF6
520431	0.602939	9.40084	7.64803	3.1347e-07	2.51018e-05	6.92245	ZBED1
450730	0.602869	8.52864	8.62608	5.14996e-08	7.50707e-06	8.69962	CRK
1410647	-0.602399	7.55517	-4.46387	0.000262989	0.00452764	0.257298	CHST12
3830370	0.602281	7.03325	7.333	5.76219e-07	3.86957e-05	6.32105	TMEM88
7000343	0.602278	11.3472	5.89882	1.08954e-05	0.000351766	3.40788	RBPSUH
4060204	0.601419	9.37001	7.30903	6.03864e-07	3.96231e-05	6.27472	SNX11
4200328	-0.601255	8.80264	-6.47507	3.23657e-06	0.000139204	4.61193	PUS1
3710392	-0.601018	11.1467	-7.03366	1.0404e-06	5.82604e-05	5.73648	COMMD6
6040128	0.600905	7.66666	8.33875	8.64198e-08	1.04405e-05	8.19152	NUDT16
1010301	-0.600866	11.0774	-5.99649	8.84305e-06	0.000301078	3.61493	DYNC1H1
380524	0.600772	7.50395	5.39306	3.26947e-05	0.000831231	2.31813	STEAP4
7380243	0.600655	7.85736	9.05928	2.4068e-08	4.58569e-06	9.44415	RIN3
1820131	0.600533	8.0325	6.14372	6.47073e-06	0.000237395	3.92479	ANKRD13D
5490671	0.600113	8.42831	3.75683	0.00132469	0.0169546	-1.32654	HIATL1
2000433	0.599793	8.63495	5.93583	1.00654e-05	0.000331566	3.48648	RB1CC1
2450414	0.59942	12.6313	5.41005	3.1495e-05	0.000806202	2.35519	SERPINA1
2320403	-0.599397	13.3168	-6.25826	5.08452e-06	0.00019678	4.16395	RPL27
1780035	-0.599273	10.2855	-8.11911	1.29297e-07	1.34799e-05	7.79532	CALM1
4040427	0.599181	9.10919	4.98246	8.14169e-05	0.00174777	1.4147	FAM45A
7100056	-0.5991	7.31231	-5.98116	9.13682e-06	0.000309565	3.58251	CD244
5960035	-0.598957	8.52201	-3.4487	0.0026742	0.030463	-2.00772	GPBAR1
360066	-0.598916	8.24601	-2.31834	0.0316706	0.220309	-4.33926	VPREB3
4200446	0.598621	7.8782	7.76049	2.53054e-07	2.18061e-05	7.13371	APH1B
5550500	0.598609	8.75281	7.66422	3.0392e-07	2.45466e-05	6.95299	PBX2
2190360	0.598056	12.1473	6.46711	3.29034e-06	0.000140647	4.59559	RHOG
2100164	-0.597957	9.72805	-6.481	3.19715e-06	0.000137996	4.62408	HNRPH1
4570487	0.597953	7.77573	3.35588	0.00330043	0.0363791	-2.21062	LOC653117
730431	0.597563	8.51665	8.23292	1.04854e-07	1.17357e-05	8.00145	ZSWIM6
2360753	0.597545	8.27011	4.00747	0.000746376	0.0105238	-0.766678	KIAA1434
4260053	-0.59734	9.05249	-7.05403	9.99019e-07	5.65572e-05	5.77666	PHF10
7000768	-0.597305	8.09127	-5.95587	9.64345e-06	0.000321583	3.52897	LAX1
3930243	0.596848	10.9654	1.93187	0.0683449	0.370175	-5.02692	ARPC5
2360292	-0.596819	7.5925	-3.49125	0.00242777	0.0281096	-1.9143	FER1L3
1740136	0.596385	7.87833	3.11726	0.00564583	0.0568048	-2.7255	CASP5
520487	0.596152	7.85003	2.76248	0.012353	0.106693	-3.46734	LOC652616
5390056	0.596129	9.90923	6.3659	4.06e-06	0.000163769	4.38714	BCKDK
6590386	-0.595829	8.62048	-4.52087	0.000230993	0.00407625	0.385071	FN3KRP
1170113	-0.595658	8.66808	-4.26509	0.000413926	0.00651984	-0.188769	PLXNB2
4220195	-0.595562	13.8479	-2.90512	0.00904079	0.0831606	-3.17308	UBB
450132	-0.595522	8.4135	-9.13234	2.12188e-08	4.28685e-06	9.5672	BOP1
5570750	-0.595321	9.00115	-9.51722	1.10429e-08	3.07813e-06	10.2037	UNC84B
6980021	-0.595157	8.77642	-9.0614	2.39798e-08	4.58569e-06	9.44773	NAP1L1
2970044	-0.594995	9.45944	-11.9822	2.48321e-10	3.20757e-07	13.8485	MRPS21
4250133	0.59454	8.58309	6.40616	3.73374e-06	0.000153764	4.47022	CBL
360463	-0.594068	9.28494	-5.92191	1.03696e-05	0.000338795	3.45694	NDUFA12
1820039	-0.593523	7.5803	-5.95628	9.63499e-06	0.000321521	3.52984	VASH1
4200685	0.593496	8.17091	1.07469	0.295902	0.751579	-6.21405	MYOM2
3400372	-0.593133	8.40666	-10.234	3.42647e-09	1.46337e-06	11.3383	FBXO21
1500553	0.593128	12.3664	6.35093	4.18866e-06	0.000168123	4.3562	S100A6
3840368	0.593116	7.26232	3.64107	0.00172572	0.0211745	-1.58361	HIST1H2BE
1430386	-0.593014	7.91017	-4.546	0.000218166	0.00390223	0.441368	POP5
2350239	0.59301	10.2544	4.34817	0.000342381	0.00557791	-0.00228525	MIDN
6550242	0.592701	7.8572	8.0436	1.48723e-07	1.48989e-05	7.65753	ZFAND3
3870543	0.592676	10.73	7.81144	2.2979e-07	2.04157e-05	7.22881	RFWD2
2570379	0.592226	9.05339	3.79882	0.00120338	0.0156446	-1.23301	PTPRC
4210711	-0.592058	8.2312	-6.66849	2.17453e-06	0.000101897	5.00621	ACAT1
70468	-0.591977	7.48534	-7.43584	4.71668e-07	3.40209e-05	6.51894	CCDC65
6980220	0.591881	7.24863	6.88173	1.41078e-06	7.22259e-05	5.43491	LOC654052
1090678	-0.59166	9.3343	-2.15743	0.0439137	0.277918	-4.63483	MT1A
60541	0.59149	7.28531	5.44753	2.90053e-05	0.000757928	2.43681	BIRC1
150066	-0.59095	9.34734	-10.1037	4.22033e-09	1.68422e-06	11.1369	HNRPR
4760487	-0.590803	10.5709	-4.53573	0.000223318	0.00397123	0.41837	PGRMC1
1190735	-0.590765	7.14553	-2.93013	0.00855587	0.0795113	-3.12089	PRSS23
1740358	-0.590561	11.8461	-7.12188	8.73015e-07	5.13416e-05	5.9101	LOC400948
5360132	0.590534	8.20507	7.67917	2.95374e-07	2.41695e-05	6.98113	C14orf138
7210630	-0.590138	11.601	-5.54687	2.33343e-05	0.000632913	2.6525	ATP5L
5490181	-0.590132	13.1573	-5.2699	4.29113e-05	0.00104204	2.0487	LOC441114
3370736	-0.590032	10.1452	-6.43294	3.53178e-06	0.000148287	4.52537	TNFSF5IP1
50301	-0.589989	8.51496	-3.71501	0.00145758	0.0183326	-1.41954	CD79B
3420128	-0.589356	10.8798	-3.22363	0.00444774	0.0468311	-2.49729	GP9
4590608	0.588959	7.38911	2.54345	0.0197797	0.154083	-3.90662	LOC653503
5810731	0.588925	8.05671	9.47407	1.18714e-08	3.10743e-06	10.1333	OACT1
6330754	0.588879	7.93091	6.415	3.66582e-06	0.000151638	4.48843	STARD10
7570647	-0.588831	10.406	-6.30327	4.62707e-06	0.000181311	4.25746	FLJ10081
1050750	0.588735	8.27628	4.11325	0.000585824	0.0086614	-0.529532	LTBR
3610519	-0.587968	10.9508	-6.73988	1.88e-06	9.11671e-05	5.15044	NDUFA3
3440369	-0.587878	8.80279	-4.47876	0.000254224	0.00440007	0.290679	C8orf55
1450184	0.587527	9.46845	6.3122	4.54153e-06	0.000178894	4.27597	LOC153222
7000682	-0.587276	12.3689	-6.06401	7.66035e-06	0.000270849	3.75736	RPL36AL
5820431	-0.586966	9.62505	-6.84715	1.51269e-06	7.64781e-05	5.36583	TXLNA
5570196	-0.586853	13.2506	-9.49926	1.13801e-08	3.09922e-06	10.1745	LOC440589
1170553	-0.58665	10.8941	-7.84309	2.16466e-07	1.94807e-05	7.28771	PTBP1
5360435	-0.586632	8.93184	-5.54888	2.32321e-05	0.000630547	2.65685	SIGIRR
7330451	0.586563	9.59077	2.56725	0.0188042	0.148091	-3.85971	LOC648394
3440608	0.586247	13.1015	10.9799	1.07664e-09	6.63521e-07	12.4519	LCP1
5890022	-0.585908	8.292	-7.24002	6.91406e-07	4.31638e-05	6.14084	MPHOSPH10
1740128	0.58568	9.67549	4.74859	0.00013783	0.00268892	0.894407	NDUFB3
5900193	-0.585433	8.55219	-10.3189	2.99466e-09	1.35001e-06	11.4683	NUP88
1850093	0.585293	10.5181	3.78	0.00125632	0.0162245	-1.27494	TNFSF10
7160520	-0.585269	7.95462	-4.44362	0.000275405	0.00469162	0.211882	C6orf129
3120647	0.585217	10.2586	4.83117	0.000114393	0.00231867	1.07851	ARHGAP27
6420433	0.584952	7.76785	5.20571	4.94748e-05	0.00117159	1.90772	NUAK2
10543	0.584822	10.717	5.06155	6.82102e-05	0.00151572	1.5898	ANKRD13
3610112	0.584817	8.15296	8.6175	5.22937e-08	7.53261e-06	8.68461	RIT1
5900301	0.58481	11.9159	4.64505	0.000174231	0.0032445	0.6631	IGSF6
670180	0.584799	9.21609	8.05464	1.45705e-07	1.47179e-05	7.67772	ZNFX1
7200367	-0.58469	10.7942	-3.34542	0.00337945	0.0371244	-2.2334	GNG11
3130437	-0.584364	13.2166	-7.76958	2.48732e-07	2.1625e-05	7.1507	RPS14
870221	0.584267	9.21325	5.98021	9.15528e-06	0.000309974	3.5805	PGM1
2230296	-0.583827	9.71015	-11.3754	5.96494e-10	4.68411e-07	13.0162	SET
7100504	-0.583792	8.59286	-8.24519	1.02522e-07	1.15932e-05	8.02358	TTC4
4260026	0.58376	9.77905	7.36428	5.42089e-07	3.68613e-05	6.38141	PAK1
5270563	0.583681	7.89106	4.8045	0.000121483	0.002433	1.0191	ERO1L
2850288	0.583594	7.3637	3.00686	0.00721986	0.0692364	-2.95979	HIF1A
6510634	0.583493	7.9804	4.95987	8.56475e-05	0.00182252	1.36459	WDR26
2810110	0.583375	9.17976	2.03143	0.0563596	0.328266	-4.85726	TM9SF2
4810619	0.583304	7.03043	4.5802	0.000201853	0.00366156	0.517974	LOC651612
4050181	-0.583107	10.2083	-6.6625	2.20131e-06	0.000102658	4.99408	ATP5C1
6270021	-0.582706	11.0171	-6.2558	5.11078e-06	0.000197409	4.15884	HNRPM
4860600	-0.582691	8.78426	-3.79773	0.00120638	0.0156669	-1.23544	GPR171
6620167	0.582674	11.4908	5.64581	1.88096e-05	0.000540602	2.86626	ATP6V0B
6110315	0.58262	9.43351	5.84922	1.21188e-05	0.000381403	3.3023	SLC15A3
4900338	0.582517	11.0196	6.04947	7.9004e-06	0.000276141	3.72675	SNX10
6060347	-0.582498	10.4602	-3.30642	0.00369079	0.0399941	-2.31818	PPIB
940470	-0.582396	8.54999	-9.19442	1.90743e-08	4.12743e-06	9.6712	NOL11
4260154	-0.582208	9.01707	-8.04416	1.48569e-07	1.48989e-05	7.65855	POLE3
4850685	0.581935	8.02948	7.68907	2.89851e-07	2.39186e-05	6.99976	GIT2
1740343	-0.581748	9.64248	-4.98618	8.07402e-05	0.00173853	1.42295	BRD9
6760059	0.58164	11.9775	3.73603	0.00138922	0.0176138	-1.37282	LOC654103
3170291	-0.581555	9.36123	-6.11534	6.87077e-06	0.000249826	3.86528	ADSL
3450554	-0.581253	9.7412	-2.75596	0.0125295	0.10793	-3.48066	HSP90B1
2140156	0.581203	10.8362	5.49121	2.63557e-05	0.000698139	2.53178	CD46
130215	-0.580624	12.5637	-12.3864	1.41158e-10	2.59668e-07	14.3814	RPL39
3610050	0.580255	9.09724	8.21984	1.074e-07	1.18841e-05	7.97786	MYO9B
1050047	0.580196	9.59721	7.69912	2.84357e-07	2.35909e-05	7.01864	MYD88
4540170	-0.579871	8.67331	-7.47938	4.33521e-07	3.18834e-05	6.60227	ZNF689
540100	-0.579852	8.49995	-9.59448	9.70666e-09	2.74761e-06	10.3292	ADARB1
2970709	-0.579434	10.3593	-3.01199	0.00713811	0.0686147	-2.94897	PTGS1
4180286	0.579201	12.282	9.23327	1.78482e-08	4.02302e-06	9.73602	WAS
5360349	0.579032	7.20451	6.3838	3.91148e-06	0.000158566	4.4241	WDFY3
3170768	-0.578189	10.6744	-1.18566	0.250297	0.707286	-6.09197	LOC642113
6200273	-0.578153	9.50751	-1.16997	0.256401	0.713542	-6.10985	EPSTI1
6200021	0.578047	7.43294	8.20812	1.09736e-07	1.20332e-05	7.9567	RASGRP4
5890139	-0.57799	9.62173	-5.81634	1.30071e-05	0.000402335	3.23214	PRNP
6510102	-0.577974	8.13241	-10.7587	1.50858e-09	8.16054e-07	12.1284	PCGF4
2470142	-0.577881	8.64442	-7.76269	2.52002e-07	2.17539e-05	7.13781	RPUSD4
2940639	-0.577865	13.3732	-11.2579	7.09774e-10	5.16686e-07	12.8503	RPL9
2630168	0.577697	9.73486	4.23297	0.000445465	0.00693805	-0.260875	STAT5B
3870427	-0.577578	9.41872	-7.24815	6.80447e-07	4.28022e-05	6.15664	CYB5-M
6130674	0.577461	14.3789	7.02147	1.06602e-06	5.87782e-05	5.7124	TXNIP
3850523	-0.577106	7.24801	-4.24785	0.000430568	0.00674487	-0.22748	KIAA1671
5820142	-0.576927	8.66557	-6.72959	1.91977e-06	9.2726e-05	5.1297	SRP46
6270487	0.576678	8.14222	6.59164	2.54525e-06	0.000115168	4.85017	KBTBD11
2450253	-0.576652	8.19843	-5.89387	1.10115e-05	0.000354574	3.39736	HIP1R
6510575	0.576424	9.2966	5.87603	1.14411e-05	0.000365506	3.3594	DICER1
2940148	-0.576406	8.57222	-7.72212	2.7218e-07	2.29267e-05	7.06183	WDR61
2760392	-0.57624	8.97762	-2.37605	0.02811	0.20153	-4.23036	GZMB
50497	0.575467	9.32746	8.98859	2.72054e-08	4.86966e-06	9.32441	IHPK1
6760431	-0.575268	8.34787	-2.18094	0.0418887	0.269904	-4.59241	LOC284422
3140239	0.574961	7.85604	5.91731	1.04723e-05	0.000341048	3.44716	GADD45A
3710692	0.574704	7.69039	4.73027	0.000143656	0.0027821	0.853531	ST3GAL6
5080544	-0.574293	8.70778	-5.13499	5.79024e-05	0.00132913	1.75197	EBNA1BP2
7210414	0.574202	8.53929	6.49024	3.13667e-06	0.000136175	4.64302	TMEM8
6650575	0.574022	7.85953	2.4066	0.0263797	0.192066	-4.17215	WSB1
4780161	0.573897	8.44175	4.52914	0.000226689	0.00402509	0.403607	LRRC25
5550040	-0.573852	9.87109	-4.49636	0.000244241	0.00425757	0.330132	FIS1
6510307	-0.573349	8.1766	-6.60497	2.47656e-06	0.000112899	4.87729	SLC41A3
4570440	-0.573226	9.27788	-6.40215	3.76501e-06	0.000154689	4.46195	MRPL54
1300768	-0.573065	9.17497	-6.71464	1.97911e-06	9.40985e-05	5.09953	AKR1A1
4250070	0.573064	8.08885	4.81901	0.000117571	0.00237223	1.05143	CCR1
240731	0.573036	7.30114	6.16172	6.2294e-06	0.000230639	3.9625	C22orf5
770717	0.573016	7.64005	8.52278	6.19588e-08	8.42623e-06	8.51826	SLCO4C1
3450731	-0.572967	10.3033	-1.98054	0.0622283	0.34969	-4.94468	LOC642724
7550451	0.572717	9.61102	5.27262	4.26536e-05	0.00103678	2.05466	NPEPL1
6590300	-0.572694	8.7416	-5.29035	4.10124e-05	0.00100552	2.09353	HADH2
3310471	-0.572203	9.0723	-5.86151	1.18033e-05	0.000373889	3.32847	C3orf9
7610494	-0.572161	9.84382	-4.5247	0.00022899	0.00404677	0.393653	HSPC142
1010348	-0.572156	8.90274	-4.50467	0.000239666	0.00419283	0.348758	HSPC176
6020685	0.572065	9.09519	5.58692	2.13817e-05	0.000595886	2.73915	OSBPL9
1690360	0.571952	7.48341	5.01752	7.52674e-05	0.00163815	1.49239	CPEB4
4230475	0.571852	8.73605	5.06525	6.76484e-05	0.00150599	1.59799	LOC651143
4180398	0.571692	9.70223	4.48498	0.000250651	0.00434927	0.304618	ITGA5
5700368	0.571445	8.36156	7.027	1.05432e-06	5.82955e-05	5.72332	DDX26
2120056	-0.571423	9.67157	-4.92158	9.3334e-05	0.00195363	1.27961	ZNHIT3
6110332	-0.571323	9.47074	-7.21716	7.23221e-07	4.4628e-05	6.09634	NDUFS7
3840273	0.570874	7.79875	5.92551	1.02901e-05	0.000336583	3.46458	BTBD14A
6760255	0.570837	8.00478	3.96122	0.000829755	0.0114508	-0.870228	CYP1B1
2900504	-0.570717	7.77282	-4.83313	0.000113889	0.00231129	1.08288	HLA-DOB
1440408	-0.570599	8.15406	-4.60003	0.000192966	0.0035253	0.562371	PPM1K
6380731	0.570482	10.0815	6.45978	3.34071e-06	0.000142052	4.58053	DYNLT1
2710731	-0.570396	7.46737	-6.72038	1.95611e-06	9.35366e-05	5.11112	ENPP4
3840156	0.570125	8.96058	6.05091	7.87632e-06	0.000276141	3.72978	SP1
1090300	0.57012	9.71707	5.67171	1.77808e-05	0.000516831	2.92204	CEP63
5340164	-0.569853	8.70363	-12.8725	7.29297e-11	1.8688e-07	15.0007	EXOSC8
4810452	0.569737	8.2295	5.0375	7.19769e-05	0.00158639	1.53662	MIR16
6960273	0.569418	10.1067	2.38325	0.0276928	0.199155	-4.21667	CSPG2
7510427	0.569388	10.1341	5.30528	3.96807e-05	0.000979186	2.12624	PIK3CD
2810767	-0.568949	8.30813	-7.28343	6.34917e-07	4.11614e-05	6.22513	COG2
3610390	0.568587	8.29193	8.8205	3.64989e-08	6.04429e-06	9.03693	JARID1B
5390615	0.568501	10.7423	7.25974	6.65121e-07	4.22751e-05	6.17917	NDE1
3400025	0.568477	7.41562	5.80239	1.34038e-05	0.000411988	3.20233	GBE1
2750315	0.56799	7.90997	7.19699	7.52548e-07	4.57991e-05	6.05702	OGFRL1
780673	-0.567916	10.3645	-7.21399	7.27748e-07	4.46808e-05	6.09017	CS
1820424	-0.567747	8.53951	-6.57642	2.62612e-06	0.000118387	4.81916	DNAJC9
5340037	0.567695	10.2736	6.21513	5.56656e-06	0.000210746	4.0741	CSF2RA
2370673	-0.567625	9.59392	-4.78428	0.000127155	0.00252172	0.974019	CD99
1940709	0.567201	8.47867	5.50981	2.53037e-05	0.000675789	2.57216	SSH3
4880392	0.567152	9.26995	2.21592	0.0390336	0.256468	-4.52881	AMD1
5490408	0.566512	9.41937	7.88176	2.01267e-07	1.85941e-05	7.35948	ZMPSTE24
4570746	0.566225	9.29562	6.52298	2.9316e-06	0.000129403	4.71006	SNRK
1740471	-0.566005	10.1924	-3.15092	0.00523621	0.0535691	-2.65354	PSMF1
20136	-0.565963	8.79654	-7.07309	9.61822e-07	5.49035e-05	5.81422	MRPL15
1400706	0.565773	7.4267	9.49054	1.15478e-08	3.09922e-06	10.1602	HLX1
3420193	0.565707	9.25882	4.11689	0.000580968	0.00860267	-0.521376	PLEKHG3
3120750	-0.564842	8.96684	-4.23999	0.000438371	0.00684289	-0.245115	HNRPDL
3710484	0.564528	7.52068	7.24516	6.84455e-07	4.29434e-05	6.15083	FBXL20
2490209	-0.564302	9.42444	-5.5266	2.43912e-05	0.000656097	2.60858	PPIL3
6380598	-0.563775	8.54322	-7.67004	3.00563e-07	2.44793e-05	6.96395	IMP4
3450402	0.563705	8.8535	8.33146	8.75743e-08	1.05277e-05	8.17848	RENT1
6660438	-0.563397	8.93826	-2.74306	0.0128855	0.110341	-3.50695	C6orf160
6250025	0.562901	7.8691	2.66355	0.0153013	0.126374	-3.66779	GOLGB1
6330471	0.562556	8.03164	7.46296	4.4752e-07	3.27645e-05	6.57087	C8orf1
60095	0.562182	7.55557	4.83335	0.000113831	0.00231112	1.08338	RPGRIP1
1660139	0.561721	9.12808	5.15965	5.48081e-05	0.00127449	1.80634	VPS37B
7050121	-0.561681	8.96366	-7.87221	2.04915e-07	1.87885e-05	7.34177	DDX1
3710497	0.561544	7.21138	9.02897	2.53646e-08	4.71345e-06	9.39288	NDST1
6560554	-0.561436	9.24582	-6.43744	3.49898e-06	0.000147344	4.53462	C17orf70
5290369	0.561379	7.72358	14.9857	5.1333e-12	1.105e-07	17.4434	TFE3
6860370	0.561252	9.52658	5.65834	1.83043e-05	0.000529835	2.89326	MGC7036
160398	-0.560965	8.96055	-4.12891	0.000565201	0.00840242	-0.494409	KIAA1423
4010300	-0.560537	7.99164	-7.31695	5.94582e-07	3.92351e-05	6.29003	ANAPC1
7320373	0.560498	10.3925	3.8616	0.00104235	0.0139038	-1.09296	EMR2
5820634	-0.560414	8.69978	-3.79039	0.00122681	0.0158898	-1.25179	SLC25A23
3180376	0.560383	7.32872	6.0881	7.27869e-06	0.000261087	3.80807	ACP6
2350026	0.560277	7.41629	3.67971	0.00158002	0.0196592	-1.49794	CECR6
5490128	-0.559919	10.3534	-6.46322	3.31694e-06	0.000141411	4.58761	TUBA6
3190681	0.559407	8.90422	7.3927	5.12899e-07	3.55759e-05	6.43612	STX10
1260100	-0.559053	8.58055	-3.39139	0.00304542	0.0339987	-2.13314	MFGE8
5130040	-0.558681	11.04	-1.58719	0.128883	0.529814	-5.56774	LOC390354
6180438	0.558612	9.41727	8.89153	3.2223e-08	5.5047e-06	9.15887	LOC126208
2060040	0.558557	13.8494	7.80949	2.30639e-07	2.04537e-05	7.22518	MYL6
1230494	0.558392	9.00164	5.75729	1.47735e-05	0.00044565	3.10582	HMGCR
7570112	0.558378	10.189	11.1287	8.60601e-10	5.81945e-07	12.6662	USP3
6860070	0.55836	8.14458	5.74582	1.51441e-05	0.000454856	3.08124	RAB11FIP1
3370474	-0.557806	8.77675	-4.29037	0.000390698	0.00620617	-0.132036	CALR
6590687	-0.557765	7.86884	-5.56818	2.22737e-05	0.000613606	2.69863	VARSL
6510091	0.557516	9.08398	7.55785	3.72633e-07	2.8481e-05	6.75176	FBXO38
6220487	-0.557283	9.59813	-7.25605	6.6996e-07	4.23615e-05	6.172	C2orf28
4050411	-0.557218	8.95357	-6.22355	5.46888e-06	0.000208018	4.09166	ALDH16A1
2350615	-0.557175	7.67859	-4.0505	0.000676341	0.00973943	-0.670257	C20orf27
2710528	0.556922	7.75198	5.57181	2.20979e-05	0.000611296	2.70648	PGM2
6380471	-0.556915	10.3428	-2.89229	0.00929971	0.0850542	-3.19978	LOC402694
1450270	-0.556717	9.63726	-4.11045	0.00058959	0.00870915	-0.535812	C17orf49
6620170	-0.556663	8.58715	-4.01506	0.000733505	0.0103722	-0.749661	GSDML
4570553	-0.556583	8.36069	-5.17379	5.31114e-05	0.00124379	1.83748	AK3
4920576	0.55654	8.43131	6.1103	6.94451e-06	0.000251194	3.85469	ST8SIA4
6980100	0.556385	7.19081	5.28996	4.10477e-05	0.00100552	2.09268	PRRG4
240673	-0.556141	9.94495	-5.4533	2.86398e-05	0.000750704	2.44938	MDH2
3170433	0.556072	7.23933	4.3628	0.00033114	0.00543384	0.0305439	MLSTD1
6250037	-0.555796	12.5689	-2.64356	0.015973	0.130658	-3.70789	HBD
20601	0.555654	7.92726	3.27624	0.00395086	0.0424626	-2.38362	FLJ12118
2710301	-0.55557	9.47636	-6.90289	1.35194e-06	7.00111e-05	5.47711	SLC38A1
460187	-0.55557	9.56448	-4.77017	0.00013127	0.00258646	0.942565	IRF8
5890019	0.555435	8.40382	1.81342	0.0855096	0.422785	-5.22127	WASPIP
7000100	0.555388	9.48444	8.20049	1.11287e-07	1.21485e-05	7.9429	CREBBP
5720441	0.555262	10.0144	3.25878	0.00410939	0.0439337	-2.42139	NPL
5720450	0.554886	7.14553	2.8753	0.00965364	0.0876225	-3.23508	MPO
3290605	-0.554677	12.6359	-5.64769	1.87329e-05	0.000539035	2.87031	TOMM7
6510725	-0.554649	7.96921	-5.27526	4.24049e-05	0.00103228	2.06046	SRM
1400097	-0.554619	10.064	-2.91271	0.008891	0.0819996	-3.15727	LOC650472
6280575	-0.55454	8.65432	-6.83534	1.54921e-06	7.80812e-05	5.34219	DNAJA3
5550195	-0.554367	12.0823	-4.09172	0.00061543	0.00900073	-0.577837	CST3
7200309	0.553994	7.73304	1.72784	0.10015	0.46265	-5.3563	FAM49B
3130056	-0.553713	9.34959	-7.09673	9.17697e-07	5.33173e-05	5.8607	TIMM23
7330546	-0.553561	8.51887	-5.55172	2.30886e-05	0.000628348	2.66299	UBE3A
6290097	0.553396	12.7848	4.8237	0.000116336	0.00235022	1.06187	SAT
6620048	0.553336	9.2853	4.97137	8.34661e-05	0.00178782	1.39011	GSK3B
4120133	-0.553248	8.07356	-5.28447	4.15496e-05	0.00101603	2.08064	SPATA20
6400328	-0.553236	9.57342	-3.4219	0.00284189	0.0321103	-2.06643	LY86
3610601	-0.553155	7.34366	-3.75058	0.00134376	0.0171311	-1.34045	CDKN1C
3990520	0.55297	7.60724	9.60474	9.54233e-09	2.74761e-06	10.3458	MAP3K3
730255	-0.55282	11.6685	-2.61677	0.0169176	0.136586	-3.76143	HAGH
1070435	-0.552595	9.57359	-6.16888	6.1361e-06	0.000227704	3.97747	B4GALT3
3400504	-0.552377	8.97797	-6.62499	2.37696e-06	0.000109074	4.91798	IMPDH2
4390541	-0.552127	7.10848	-6.07611	7.46618e-06	0.000265333	3.78284	FASLG
1090136	0.552102	9.7911	4.5498	0.000216286	0.00387857	0.449898	PPP1R14B
650646	-0.551918	12.9995	-9.50549	1.1262e-08	3.09922e-06	10.1846	LOC441034
4640379	0.551777	8.20614	6.38383	3.91126e-06	0.000158566	4.42416	MTF1
5570661	-0.551621	7.78609	-7.63237	3.22996e-07	2.56119e-05	6.8929	PDXP
4880026	0.551621	7.02228	5.43133	3.00556e-05	0.000776708	2.40155	KIAA1026
1510224	-0.551501	8.41208	-6.33532	4.32737e-06	0.00017213	4.32389	NOLA2
5700139	0.551361	9.86264	2.87596	0.00963971	0.0875124	-3.23372	DKFZp564K142
7050450	-0.550962	10.2919	-7.05627	9.94576e-07	5.63713e-05	5.78107	SLC25A6
4150253	-0.550756	9.51075	-5.1477	5.62857e-05	0.00129999	1.78001	C20orf55
2470131	-0.550678	8.02014	-5.82986	1.26342e-05	0.000393047	3.26099	ABI3
6900367	0.55048	10.6638	3.758	0.00132114	0.0169135	-1.32392	MARCKS
3830647	-0.550438	12.903	-5.30624	3.95967e-05	0.000978104	2.12834	LOC647099
2340603	0.550418	8.28569	6.96621	1.19056e-06	6.36276e-05	5.603	RNF166
2070487	0.55019	11.8846	6.2185	5.52725e-06	0.000209583	4.08113	NINJ1
6420392	-0.550173	11.3568	-3.44852	0.00267528	0.0304682	-2.00811	POLR1D
3140408	-0.550124	8.21956	-5.6069	2.04708e-05	0.000575107	2.78233	DJ122O8.2
7570100	-0.549548	10.013	-5.78325	1.39685e-05	0.000425064	3.1614	C11orf2
5550689	-0.549536	8.20953	-1.57772	0.131046	0.534805	-5.58149	LOC651751
5360538	0.549532	9.57019	9.24055	1.76276e-08	4.02302e-06	9.74815	C6orf166
2340068	-0.549405	8.13249	-10.8443	1.32315e-09	7.6458e-07	12.2543	RPL7L1
610273	-0.549197	8.418	-3.67911	0.00158216	0.0196758	-1.49926	OPTN
6270364	-0.549171	8.39398	-7.62567	3.27168e-07	2.58585e-05	6.88023	GGA2
6100707	0.548968	8.07709	6.03005	8.23342e-06	0.00028531	3.68579	MAP3K11
7380411	-0.548931	7.74236	-4.21307	0.00046621	0.00718757	-0.305554	TSEN54
6380593	0.548729	8.28641	4.62452	0.000182535	0.00336505	0.617172	RABGEF1
630500	-0.548545	9.87791	-9.1299	2.13079e-08	4.28685e-06	9.56311	EIF3S3
2320035	0.548508	8.48092	5.83896	1.23893e-05	0.000387658	3.28041	MKNK2
1990280	-0.547986	9.84597	-3.48214	0.00247858	0.0286298	-1.93432	ADAM15
5310131	0.547923	13.6415	4.57496	0.00020427	0.00369851	0.50624	RNASET2
70286	0.547854	13.7588	7.0331	1.04156e-06	5.82604e-05	5.73538	LOC643509
4260035	0.547661	11.0676	7.22527	7.11753e-07	4.41609e-05	6.11215	PRKAR1A
7380288	-0.547559	10.0723	-10.0574	4.54737e-09	1.75339e-06	11.0647	ANAPC5
940474	-0.54739	8.45053	-4.96437	8.47859e-05	0.00180869	1.37459	MGST3
3440193	0.547192	8.19291	6.68142	2.11784e-06	9.9721e-05	5.03239	SLC35E3
2350377	0.546892	9.4681	3.12807	0.00551101	0.0557247	-2.70242	PRIC285
2510086	-0.546692	12.1186	-7.44657	4.61954e-07	3.35689e-05	6.53951	AP2S1
580280	-0.545912	9.23097	-9.01887	2.58126e-08	4.76038e-06	9.37577	ETFA
7570603	0.545458	11.3453	3.77631	0.00126697	0.016336	-1.28316	RAB31
630180	0.545402	7.45344	3.353	0.00332195	0.0365669	-2.21688	SYNJ1
5670017	-0.545155	9.34621	-5.41225	3.13429e-05	0.000803797	2.35999	ZNF512
4920273	-0.545114	8.72687	-6.54476	2.80291e-06	0.000124512	4.75457	DDX18
3930138	0.544932	6.96659	2.56996	0.0186959	0.147605	-3.85435	RAB33B
2630451	0.544858	9.28055	4.83126	0.00011437	0.00231867	1.0787	HIST2H2BE
1190369	-0.544717	8.49138	-4.68386	0.000159565	0.00301114	0.749861	SRPRB
6840224	0.544602	9.55876	5.55918	2.27156e-05	0.000621673	2.67914	MYST1
2000743	0.544537	8.12102	6.73784	1.88784e-06	9.1365e-05	5.14632	ZDHHC3
1300180	-0.544309	9.15608	-6.6474	2.27037e-06	0.000105174	4.96346	WWP1
10215	-0.544298	8.94848	-3.85289	0.00106333	0.0141449	-1.1124	CD86
2260148	-0.544269	8.20536	-4.61873	0.000184948	0.00340308	0.604223	NELL2
6060242	-0.544132	11.0413	-5.67962	1.74781e-05	0.000509861	2.93907	GSTK1
6100598	0.544074	7.62567	4.39346	0.000308771	0.00514658	0.0993388	C10orf73
2810270	0.543621	8.55696	3.67028	0.00161439	0.0200101	-1.51885	GADD45B
6560088	-0.543612	7.50224	-5.19145	5.10668e-05	0.00120401	1.87636	HLA-DOA
240561	-0.543519	9.01222	-5.0283	7.34735e-05	0.00161135	1.51625	POLR2H
4480026	-0.543384	8.38338	-5.69851	1.6777e-05	0.000492655	2.97968	ZNF395
5810113	-0.543271	9.33339	-5.94979	9.7695e-06	0.000325118	3.51608	PSMC3
6350142	0.543206	7.2091	6.26126	5.05265e-06	0.000195703	4.17019	TNNI2
5340475	-0.543176	8.50499	-8.22434	1.06517e-07	1.1833e-05	7.98598	APPBP1
6580280	0.542722	8.03757	5.56668	2.23464e-05	0.000614678	2.69539	MYO5A
6370202	0.542409	6.89218	3.71828	0.00144672	0.0182242	-1.41227	ORM2
2490736	-0.542274	9.27137	-3.45885	0.00261326	0.0299182	-1.98546	HMBS
6510706	0.542271	8.71384	4.52172	0.000230548	0.00407282	0.386973	ABHD3
3840367	0.542053	8.42252	2.24905	0.0364954	0.244409	-4.46803	PTPN12
6510202	-0.54203	8.30244	-2.64211	0.0160229	0.130978	-3.71079	CLIC3
4570435	-0.542005	9.59026	-11.5895	4.36142e-10	4.25393e-07	13.3143	ERH
5720709	0.542	8.45611	4.48496	0.000250663	0.00434927	0.304569	UNQ1912
5290075	-0.541997	8.69362	-10.7722	1.47743e-09	8.16054e-07	12.1484	C10orf86
3120612	0.541883	8.6977	3.12831	0.00550795	0.0557093	-2.70189	CHMP5
5670601	-0.541644	13.1197	-8.33603	8.6849e-08	1.04664e-05	8.18665	RPL35A
4890431	0.541517	10.5465	5.11902	5.99996e-05	0.00136953	1.71675	LRCH4
6130468	0.541399	7.05009	4.00621	0.000748527	0.0105511	-0.769493	GPR30
4230551	-0.54125	10.3889	-6.08787	7.28237e-06	0.000261087	3.80757	DYNLRB1
5290328	0.541162	7.57141	4.62399	0.000182754	0.00336781	0.615992	ASF1B
3450228	-0.541138	9.04285	-6.95382	1.22048e-06	6.50124e-05	5.57842	SUMO3
1440326	0.541118	8.70404	2.60922	0.0171933	0.138356	-3.77647	IER3
6770142	-0.54072	8.65592	-6.194	5.81969e-06	0.000218292	4.02999	NME3
7560129	-0.540697	7.11184	-5.08592	6.45973e-05	0.00144933	1.64366	PRSS33
6100220	-0.540446	8.15211	-4.90184	9.75675e-05	0.00203003	1.23575	B4GALT7
6900020	0.540287	8.54794	5.9464	9.8406e-06	0.000326591	3.50889	UBE4B
4860215	-0.540022	13.3761	-7.6993	2.84257e-07	2.35909e-05	7.01899	RPS8
4570397	0.539992	7.79622	4.95398	8.67866e-05	0.00184193	1.35153	C7orf25
6840743	0.539769	7.36154	6.9011	1.35682e-06	7.00523e-05	5.47355	NFAM1
3180192	0.539749	6.87285	6.32372	4.43347e-06	0.000175775	4.29986	LOC652578
6580048	-0.539533	8.44282	-6.53651	2.85093e-06	0.000126415	4.73772	PA2G4
4810292	-0.539496	11.9954	-2.88713	0.00940596	0.0858152	-3.21052	LOC402057
6220209	-0.539471	8.94503	-5.68736	1.71871e-05	0.000503179	2.95573	NDUFS4
3830048	-0.539171	8.3102	-5.44619	2.90905e-05	0.000758722	2.43391	CCDC25
5310452	0.539067	8.23887	4.07041	0.000646196	0.00937466	-0.625617	NUP50
3390008	-0.538648	9.15918	-4.77218	0.000130676	0.0025758	0.947046	RASSF7
540332	-0.538578	8.97689	-5.37697	3.38741e-05	0.000853639	2.28301	FLJ14981
6280474	-0.538397	8.71918	-9.34527	1.4752e-08	3.55558e-06	9.92177	DDX21
5720398	0.538123	7.49634	6.26978	4.96322e-06	0.000192852	4.1879	PDZD8
2450347	0.538055	11.1984	6.45809	3.35237e-06	0.000142175	4.57707	RAB7
3930678	0.537876	8.30386	7.46025	4.49872e-07	3.28873e-05	6.56569	MAPKAPK2
7050091	-0.537831	10.9791	-5.93826	1.00133e-05	0.00033052	3.49163	TBCA
2650148	0.537758	8.83787	3.19437	0.00475007	0.0494384	-2.5603	CEBPA
1440379	0.537708	8.36344	8.61877	5.21754e-08	7.53261e-06	8.68684	SETX
5420687	0.537378	7.86858	7.27868	6.40861e-07	4.14364e-05	6.21592	MSRA
5220193	0.537101	8.0235	6.06081	7.71254e-06	0.000271905	3.75063	GBA
4070592	-0.53707	7.90283	-5.45958	2.82483e-05	0.000742214	2.46303	LOC205251
3610184	-0.536989	7.9845	-7.39467	5.10945e-07	3.55377e-05	6.43989	PPIH
1690309	0.536734	7.35989	6.41284	3.68227e-06	0.000151931	4.48399	SPFH1
2190678	0.536644	11.6633	2.77102	0.0121257	0.105126	-3.44989	IL4R
5490411	-0.536219	8.6141	-6.50811	3.02293e-06	0.00013188	4.67964	PQLC3
3890475	0.536028	10.5539	5.38956	3.29479e-05	0.000836357	2.31049	ATP6V1A
6550670	0.535934	8.00279	5.03028	7.31488e-05	0.00160666	1.52064	CYBRD1
4880195	-0.535825	9.48058	-7.11852	8.78861e-07	5.14552e-05	5.90349	NSUN2
2710762	-0.535773	10.0591	-4.70037	0.00015371	0.00292883	0.786758	MYO1G
3710332	0.535671	8.72567	6.0135	8.5285e-06	0.000292757	3.65086	RAB5C
3850747	0.535404	7.65886	4.32503	0.000360958	0.00582088	-0.0542306	ZNF238
6900632	0.535392	8.02114	5.49907	2.59059e-05	0.000689225	2.54884	C16orf48
4210400	0.535322	8.26963	8.64767	4.95562e-08	7.43372e-06	8.73733	C11orf56
4860296	0.535278	8.1594	5.62648	1.96166e-05	0.000558196	2.82459	BTBD10
6250121	0.535271	8.38962	4.66131	0.00016793	0.00314341	0.699443	H2AFJ
5870551	0.535208	8.52664	8.29651	9.3338e-08	1.09067e-05	8.11584	RFFL
1410307	-0.535122	9.71984	-3.56934	0.0020324	0.0243303	-1.74225	SLC27A3
3290133	0.534657	8.58768	6.11895	6.81856e-06	0.000248113	3.87285	EGLN2
360692	-0.534535	9.31403	-7.58026	3.56927e-07	2.754e-05	6.79428	CCT8
1440102	-0.5343	8.02285	-7.56853	3.6506e-07	2.79673e-05	6.77203	DPP7
4640475	-0.534227	9.60706	-2.33932	0.0303305	0.213356	-4.29985	RAB2B
4490050	0.534226	7.21593	3.15125	0.00523237	0.0535523	-2.65284	PCTP
770746	-0.534205	7.95618	-7.27472	6.45849e-07	4.15537e-05	6.20825	ABHD14A
2070239	-0.533829	13.4447	-11.4635	5.24118e-10	4.32504e-07	13.1394	LOC647572
130451	-0.533102	8.65723	-5.05296	6.95319e-05	0.00154087	1.57081	GCN5L2
1430743	-0.532963	9.28828	-4.07335	0.000641865	0.00932294	-0.619031	CYC1
5870356	-0.532751	7.96302	-7.12929	8.60298e-07	5.07087e-05	5.92462	MPDU1
5700445	0.532704	11.4376	4.51779	0.00023262	0.00410049	0.378159	FOXO3A
2970739	-0.532522	7.93845	-5.22521	4.73788e-05	0.00113409	1.95059	SLC7A1
270521	-0.532384	8.40448	-6.19418	5.81744e-06	0.000218292	4.03037	GMPS
610348	0.532287	9.42038	4.30314	0.000379465	0.00605206	-0.103372	YIPF3
6280528	-0.532146	9.51407	-5.78356	1.3959e-05	0.000425064	3.16207	CCDC12
7560441	0.531387	8.67536	2.11181	0.0480978	0.295288	-4.71631	LMO2
1710201	0.531304	8.77245	4.63009	0.000180242	0.00333655	0.629641	CASC3
7160164	-0.531118	7.98025	-6.00761	8.63612e-06	0.000295272	3.63842	C6orf108
2640433	0.531027	7.17705	8.91303	3.10338e-08	5.3431e-06	9.19566	OACT2
1660753	-0.530704	12.9691	-8.45911	6.94842e-08	9.14318e-06	8.40575	LOC440733
6550309	0.530681	8.38693	4.58598	0.000199222	0.00362057	0.530913	SYK
1980491	-0.530443	9.12047	-3.80731	0.00118023	0.015393	-1.21408	SCARB2
6130546	-0.530168	8.33603	-5.61496	2.01148e-05	0.000570511	2.79972	PFKP
5270672	-0.530153	10.3975	-5.26593	4.32904e-05	0.00104912	2.03998	GPX4
2070494	-0.530128	8.50232	-7.27145	6.50014e-07	4.1751e-05	6.20189	ILF3
840184	-0.530097	10.0418	-4.6022	0.000192018	0.00351194	0.567226	SFRS14
1820021	-0.529654	8.06052	-5.16292	5.44113e-05	0.00126934	1.81354	VARS
4250398	-0.529508	11.6035	-3.35578	0.00330114	0.0363791	-2.21083	HIST1H4C
6110132	-0.529446	9.47164	-5.86834	1.16313e-05	0.000370127	3.34303	RPP21
940224	-0.528745	8.88998	-7.07246	9.63042e-07	5.49035e-05	5.81296	NDUFV1
2640204	-0.528643	8.25197	-5.11505	6.05325e-05	0.00137781	1.70799	PDCL3
3420735	-0.528568	8.87445	-4.89294	9.95399e-05	0.00206225	1.21596	PHF15
3520739	-0.528563	9.3312	-5.16294	5.44085e-05	0.00126934	1.81359	CPSF4
3440411	0.528032	8.564	3.94922	0.000852864	0.0117099	-0.897073	HSPA1B
4810543	0.52771	7.2773	6.87255	1.43711e-06	7.32656e-05	5.4166	LOC648998
1190411	-0.527598	8.86196	-4.52492	0.000228876	0.00404621	0.394145	MAN1B1
7330537	-0.527505	9.09703	-5.71274	1.62675e-05	0.000481177	3.01026	RAD23A
4290372	0.527467	8.21663	11.5575	4.56895e-10	4.25393e-07	13.2701	MGC3123
4070541	0.527419	7.72086	5.30168	3.99972e-05	0.000984999	2.11837	PDE3B
5090367	-0.527351	7.9647	-6.39806	3.79717e-06	0.000155225	4.45352	UNG
2570719	-0.526907	8.28248	-6.87947	1.41722e-06	7.24034e-05	5.4304	DCTD
3130440	-0.526885	8.59685	-8.37438	8.10004e-08	9.98396e-06	8.25515	GCDH
5720192	0.526884	7.90028	5.27875	4.20788e-05	0.00102691	2.0681	LSP1
360053	0.526702	8.95226	7.53973	3.85858e-07	2.90809e-05	6.71732	INPP5A
5550044	0.526677	8.89154	4.25335	0.000425184	0.00667987	-0.215123	LBA1
290670	-0.526579	8.65005	-5.568	2.22823e-05	0.000613606	2.69824	USP24
5420142	0.526531	8.19938	2.80508	0.0112583	0.0989069	-3.38009	SP3
2760563	-0.526187	8.4152	-7.21423	7.27402e-07	4.46808e-05	6.09064	EIF2B1
4920189	-0.526075	8.35432	-6.01207	8.55443e-06	0.000293303	3.64785	LTV1
1090682	-0.52585	10.4979	-5.35848	3.5283e-05	0.00088502	2.24263	SARS
3140093	-0.525802	8.88815	-4.88449	0.000101451	0.00209383	1.19717	LZTR1
6420692	0.525488	8.09158	4.47911	0.000254024	0.00439817	0.291454	RSBN1L
4560017	0.52539	7.08823	5.11262	6.08617e-05	0.00138354	1.70262	ZNF33A
3520647	-0.525307	8.55973	-5.89946	1.08805e-05	0.000351752	3.40923	NIFIE14
1010538	-0.525212	8.3079	-4.81591	0.000118397	0.00238494	1.04452	KIAA0182
5700369	0.525124	10.2778	2.5486	0.0195649	0.152751	-3.8965	TUBA3
1440433	-0.525041	8.18141	-11.5237	4.7995e-10	4.25393e-07	13.2233	BXDC2
5390541	-0.525034	9.97055	-3.09994	0.00586852	0.0587298	-2.76243	EIF2AK1
5080056	0.524686	8.42252	6.07427	7.4953e-06	0.000266173	3.77897	FLJ10379
1660091	-0.524669	8.39037	-2.22164	0.0385843	0.254134	-4.51836	CD19
580725	-0.524301	9.72893	-5.60777	2.0432e-05	0.000574349	2.78421	LARP1
5550487	-0.523796	7.56162	-3.79322	0.00121889	0.0158125	-1.24549	CAMK1
6620601	0.523731	7.28277	6.09255	7.21047e-06	0.000259273	3.81741	ARHGAP26
3940075	-0.523629	7.97883	-7.02643	1.05551e-06	5.82955e-05	5.72221	FAM82C
4560598	0.523416	10.1931	4.56613	0.000208409	0.00376087	0.486464	CTSS
7560241	-0.523379	8.33754	-7.26516	6.58083e-07	4.21118e-05	6.18969	DXS9879E
3830228	0.52337	7.66471	3.43753	0.00274288	0.0310998	-2.0322	ARID4A
1430064	0.523086	11.7634	8.05463	1.45707e-07	1.47179e-05	7.6777	C20orf24
6060327	-0.522751	10.8831	-2.05206	0.0541255	0.319846	-4.82141	LOC440927
1090332	-0.522588	8.20095	-6.42899	3.5609e-06	0.000148687	4.51723	CIRH1A
4590082	-0.52243	10.0358	-7.2502	6.77701e-07	4.26847e-05	6.16064	PRPF8
4220546	0.521895	10.3285	7.09299	9.24534e-07	5.36505e-05	5.85335	PTPRE
360762	0.521781	14.3498	5.99195	8.92904e-06	0.000302946	3.60533	ARHGDIB
2060241	-0.521389	9.26362	-8.11561	1.30137e-07	1.35096e-05	7.78894	CD47
3780747	0.520876	7.77603	5.62861	1.95263e-05	0.000556414	2.82917	COP1
240037	0.520677	9.25145	4.13159	0.000561751	0.00836217	-0.488407	PCMTD1
4760687	-0.520604	8.24665	-4.52516	0.00022875	0.00404546	0.394686	LOC440348
2070463	-0.520433	9.06908	-4.75715	0.000135189	0.00264974	0.913514	THAP11
6270358	-0.520366	13.394	-5.57679	2.18589e-05	0.000606408	2.71726	LOC650901
5960343	-0.520334	11.2867	-3.14879	0.00526119	0.0537568	-2.65809	C11orf10
7160255	-0.520262	8.13903	-6.66549	2.18791e-06	0.000102229	5.00013	STAMBPL1
1260682	-0.520169	10.6036	-8.96261	2.84633e-08	5.02098e-06	9.28021	HNRPD
2480128	-0.519997	10.3576	-5.7903	1.37577e-05	0.00042071	3.17648	SS18L2
5550364	-0.519882	9.60938	-1.33537	0.197449	0.645444	-5.91109	RPL14L
2340592	-0.519802	8.01873	-6.24422	5.23653e-06	0.000201065	4.13473	EMG1
1430133	0.51976	8.44733	3.69098	0.00153985	0.0192133	-1.47292	CD63
3850497	-0.519485	8.47617	-10.1255	4.07573e-09	1.65733e-06	11.1706	PWP1
3370437	0.51941	8.33557	7.37641	5.2943e-07	3.60848e-05	6.40477	USP4
4810615	-0.519391	9.03097	-3.89085	0.000974835	0.0131364	-1.02762	KIAA0746
6660437	-0.519343	7.7656	-7.08282	9.43394e-07	5.44207e-05	5.83336	ACAA2
5360338	0.519278	8.23675	1.69044	0.107195	0.479821	-5.41381	SDFR1
2600669	0.519248	7.18504	4.81686	0.000118144	0.00238114	1.04663	LOC647834
7320088	0.519244	10.1436	2.04909	0.054442	0.320924	-4.82659	USP49
2450670	0.519219	8.92178	4.53873	0.0002218	0.00395559	0.425091	GRB2
3710086	-0.518779	9.86032	-6.18341	5.95096e-06	0.000222189	4.00786	NDUFA11
3130458	-0.518248	8.07337	-10.8243	1.3641e-09	7.72254e-07	12.225	ZNF664
5890246	0.518234	10.0754	4.99103	7.98671e-05	0.00172407	1.43371	RXRA
290370	0.518147	10.1264	5.63418	1.9291e-05	0.000551187	2.84119	CHMP1B
6520605	-0.518106	10.3673	-2.88047	0.00954451	0.0868261	-3.22434	MGC17330
3140575	-0.518074	12.6669	-2.33792	0.0304182	0.213705	-4.30248	LOC391656
3060438	-0.517878	8.95578	-2.88535	0.00944271	0.0860646	-3.21421	CA2
2570338	0.517735	7.49526	6.19309	5.83087e-06	0.000218543	4.02808	MCTP2
3060615	0.517582	8.26834	2.66928	0.0151136	0.125206	-3.65626	PIK3CG
2320717	0.517444	7.96173	7.40813	4.97745e-07	3.49693e-05	6.46576	PLP2
5900242	-0.517118	7.65408	-5.80719	1.32658e-05	0.00040904	3.21259	MULK
5900241	-0.51711	9.26783	-6.42441	3.59484e-06	0.000149609	4.50782	SF3A2
6290239	-0.51708	10.0522	-5.02775	7.35646e-05	0.00161263	1.51503	MCM7
3370239	-0.516889	7.34957	-2.4511	0.0240354	0.179317	-4.08661	SH2D1B
520184	0.516861	8.8699	5.86736	1.16558e-05	0.000370664	3.34095	RAB32
5130435	-0.516845	10.0761	-1.42085	0.171478	0.605194	-5.79986	ROPN1B
60021	-0.516724	11.5236	-1.79919	0.0878064	0.429251	-5.24404	LOC648000
3450131	-0.516367	7.36982	-3.98273	0.000789866	0.0110095	-0.822066	CACNG6
3450452	-0.516352	8.79728	-7.4394	4.68426e-07	3.38874e-05	6.52576	TH1L
6650326	-0.51623	8.13034	-4.22439	0.00045429	0.00704171	-0.280133	PRPF19
4050286	0.515892	9.19949	4.62753	0.000181295	0.00334853	0.623897	LOC645671
2030520	0.51588	8.84843	7.41108	4.94899e-07	3.487e-05	6.47143	SMG7
5870400	0.515872	8.6625	6.6009	2.49733e-06	0.000113527	4.86901	RAD21
3370288	0.515801	8.49027	8.32813	8.81081e-08	1.05411e-05	8.17251	KIAA0804
5340392	-0.515733	9.78839	-7.1878	7.66302e-07	4.64041e-05	6.0391	MAN2A1
1770152	0.515725	7.24935	5.09747	6.29526e-05	0.00142094	1.66919	CLEC5A
130619	-0.515659	8.26828	-5.43694	2.96873e-05	0.000770462	2.41377	NDUFA9
7570653	0.515594	8.5425	4.10362	0.000598891	0.00880912	-0.551149	RAP80
4490187	0.515371	8.3112	5.21387	4.85867e-05	0.00115618	1.92566	CDS2
160523	-0.515327	8.84201	-7.27454	6.46089e-07	4.15537e-05	6.20788	LSM5
110487	-0.51512	8.86061	-8.00043	1.61168e-07	1.59812e-05	7.57839	POLR3C
630717	-0.51512	9.2441	-4.13294	0.000560009	0.00834052	-0.485363	BTF3
3850242	-0.514778	8.93106	-5.66572	1.80133e-05	0.000522964	2.90916	RASSF1
6040152	0.514604	8.58432	6.51893	2.95619e-06	0.000130252	4.70178	CENTB2
6660097	0.514413	7.38621	6.66442	2.19268e-06	0.000102354	4.99797	QKI
5130767	-0.514316	8.01278	-7.61482	3.34032e-07	2.62307e-05	6.85973	SMAD3
1780347	0.514289	9.36319	4.75184	0.00013682	0.00267642	0.901675	C17orf62
5260091	0.514163	8.33046	5.73048	1.5655e-05	0.000466911	3.04833	NUFIP2
3520341	-0.513822	8.25103	-4.48854	0.000248627	0.00432009	0.312604	CBLB
5910274	-0.513675	9.96636	-3.98322	0.000788981	0.0110003	-0.820969	C2orf29
1980128	-0.513567	8.64614	-6.01426	8.5146e-06	0.000292555	3.65248	FLJ20512
2000026	-0.513498	11.2119	-3.23766	0.00430954	0.0456524	-2.46702	LOC643031
6350364	-0.513442	12.338	-2.07723	0.0515072	0.309329	-4.77736	PPBP
2850398	-0.513167	8.34951	-7.62324	3.28692e-07	2.59368e-05	6.87564	MKI67IP
7400193	0.51314	7.09182	10.967	1.09799e-09	6.65458e-07	12.4331	RAB3D
5090433	0.512594	8.73633	6.36327	4.08233e-06	0.000164397	4.3817	CAMK2G
3170743	-0.512592	10.0991	-6.84437	1.52121e-06	7.68292e-05	5.36026	SFRS2
3290066	-0.512286	10.0648	-6.93149	1.27641e-06	6.71832e-05	5.53405	EIF4B
3390192	-0.512183	7.18054	-5.94583	9.85266e-06	0.000326769	3.50768	C10orf33
5220402	-0.512117	8.65738	-4.78375	0.000127307	0.00252267	0.97284	PHYH2
4880575	-0.512015	7.68504	-4.09276	0.000613966	0.00898742	-0.575505	CRIP2
6020500	-0.511693	8.32471	-5.64124	1.89971e-05	0.000543746	2.85642	NUP210
6980685	0.511538	8.43584	6.48889	3.1454e-06	0.000136367	4.64026	CAMK1D
4640403	0.511245	9.11848	2.01578	0.0581091	0.334613	-4.88429	DOCK8
4480594	-0.511152	9.44207	-4.38889	0.000312007	0.00518808	0.089082	SLC20A1
510681	0.511017	8.08219	5.2012	4.99732e-05	0.00118166	1.89779	ACVR1B
3400685	0.510965	9.17696	7.25407	6.72569e-07	4.24713e-05	6.16816	RALBP1
5390047	-0.510803	11.3246	-2.01757	0.0579067	0.334026	-4.88121	GPR175
5820176	0.5108	7.42981	2.68003	0.0147677	0.122926	-3.63463	LOC552891
7100193	-0.510672	7.78881	-8.12959	1.26818e-07	1.33487e-05	7.81437	FTSJ1
3610408	-0.510562	7.56617	-2.56807	0.0187714	0.147908	-3.85809	KIR3DL2
4730309	0.510433	8.68181	6.47281	3.25175e-06	0.000139665	4.60729	EIF4G3
580603	0.510388	12.8516	3.44197	0.00271536	0.0308237	-2.02247	AMICA1
2650164	-0.510159	8.19904	-4.82989	0.000114722	0.0023234	1.07567	CKAP5
6040358	-0.509863	8.07287	-5.54901	2.32254e-05	0.000630547	2.65714	ATF5
290669	-0.509764	8.82001	-8.01696	1.56282e-07	1.55284e-05	7.60871	FAM60A
3370100	-0.509723	7.87467	-5.73125	1.56287e-05	0.000466911	3.05	CDR2
6650717	0.509722	6.99966	6.50888	3.01816e-06	0.00013188	4.68121	SLC26A8
4290133	0.509551	7.8277	6.62828	2.36099e-06	0.000108648	4.92466	PGCP
3830382	0.508973	8.39431	3.86655	0.0010306	0.0137772	-1.0819	RAXL1
2750484	-0.508817	9.8746	-2.00262	0.0596175	0.340235	-4.90692	C1orf128
3190411	-0.508789	9.53779	-7.54254	3.8378e-07	2.89691e-05	6.72265	PDHB
3310474	0.508774	8.82839	3.75156	0.00134076	0.0171113	-1.33827	HSH2D
7050433	0.507964	8.29047	3.80626	0.00118307	0.0154176	-1.21642	CLIC1
4760612	0.507907	7.5916	4.19138	0.000489916	0.00748667	-0.354225	LOC648852
3610528	-0.507703	8.50746	-4.37665	0.00032084	0.00530595	0.0616226	PRR5
1110164	0.507646	7.83099	5.45066	2.88064e-05	0.000754031	2.44363	FURIN
1580010	0.507562	8.25404	1.68024	0.10919	0.485271	-5.42935	TRIP12
4610397	0.507331	7.63314	5.26695	4.31918e-05	0.00104725	2.04224	RGS14
630768	-0.507242	8.34931	-4.98746	8.05091e-05	0.00173517	1.42579	NAT10
3800026	0.507225	9.99679	3.67465	0.00159836	0.0198367	-1.50916	DCP2
6580075	0.507084	8.56468	3.13704	0.00540145	0.0549019	-2.68324	NFE2L2
3800280	-0.506631	8.3071	-1.5918	0.127842	0.527853	-5.56103	RPL14
2360450	0.506626	9.32721	7.45334	4.55934e-07	3.32306e-05	6.55247	DTX2
4590301	0.506541	9.17573	3.11628	0.00565818	0.0568938	-2.72759	LMBRD1
4560435	-0.506066	8.45997	-5.1258	5.90993e-05	0.00135278	1.73171	WDR18
840110	0.506013	7.93835	7.53376	3.90322e-07	2.93266e-05	6.70596	LOC649377
60441	-0.505875	8.16345	-3.46389	0.00258351	0.0296239	-1.97439	OLIG1
6940086	0.50585	7.79933	3.07735	0.00617191	0.0612124	-2.81051	GABARAP
5290372	0.505442	8.33279	4.74888	0.00013774	0.00268892	0.895054	RAB21
1660435	0.505363	8.89224	5.6502	1.86309e-05	0.00053769	2.87572	KIAA0513
7570440	-0.505336	10.0433	-2.62316	0.0166876	0.135163	-3.74868	E2F2
1850202	-0.505229	7.30699	-5.88013	1.13407e-05	0.000363016	3.36813	LSS
5220441	0.504882	8.15791	5.51754	2.48792e-05	0.000666645	2.58894	APLP2
3360364	-0.50474	8.45758	-3.91445	0.00092356	0.0125356	-0.974865	MORC2
2370497	-0.504634	9.53284	-4.67489	0.000162839	0.00306342	0.729819	PSMA5
1410196	0.504379	8.63512	6.35037	4.19358e-06	0.000168182	4.35503	DNM2
1980541	-0.504353	8.61868	-6.71091	1.99422e-06	9.47245e-05	5.092	METAP1
360671	-0.504237	10.0987	-4.2753	0.00040438	0.006386	-0.165851	MMD
1850554	-0.504154	8.04733	-4.28417	0.00039627	0.00627421	-0.145949	LCMT1
5960424	-0.504146	9.4051	-5.64662	1.87765e-05	0.00053997	2.868	C12orf10
270164	-0.504065	7.77603	-5.83468	1.25037e-05	0.000390235	3.27129	CKS1B
5340128	0.504004	9.14093	3.36963	0.00319925	0.035473	-2.18063	FLJ33641
6250754	0.503778	7.44491	7.41958	4.86789e-07	3.47003e-05	6.48776	B3GALT7
3990482	-0.503644	9.27704	-4.52692	0.000227837	0.00403517	0.398629	C9orf74
1980424	-0.503611	8.17108	-7.2151	7.26157e-07	4.46808e-05	6.09233	TRAPPC6A
4290475	-0.503461	9.71009	-5.01219	7.61711e-05	0.0016556	1.48058	SNRPB
7550402	-0.503458	9.92014	-4.27561	0.000404096	0.00638359	-0.165162	ITGAL
4150292	0.503454	7.17662	5.2157	4.83895e-05	0.00115261	1.92969	MX2
3370253	-0.503358	12.4694	-3.47361	0.00252708	0.0291003	-1.95306	LOC439992
6980435	-0.503348	7.88997	-5.5393	2.37235e-05	0.000641324	2.6361	CD5
1580750	0.503275	8.41358	8.24105	1.03303e-07	1.16155e-05	8.01611	CHUK
6040196	-0.50324	7.942	-3.50461	0.00235511	0.0274052	-1.88492	PPP1R16B
6250673	-0.503218	9.36898	-5.71443	1.62083e-05	0.000480009	3.01388	EIF5A
6760575	0.503128	8.10241	9.80058	6.90439e-09	2.24103e-06	10.66	PLEKHM1
6450326	-0.502865	12.1356	-3.59099	0.00193458	0.0233604	-1.69444	LOC440055
3180224	-0.502639	8.0892	-6.23128	5.38078e-06	0.000205954	4.10777	HADHSC
450546	-0.502343	7.49507	-6.43277	3.53305e-06	0.000148287	4.52501	PPIE
6660471	-0.502317	8.4056	-7.60491	3.40438e-07	2.66359e-05	6.84098	MRPL11
3130209	-0.502216	11.4182	-4.45186	0.000270282	0.00462214	0.230367	FLJ21438
1690673	0.50187	8.97684	7.05148	1.0041e-06	5.67128e-05	5.77164	C1orf108
4250678	0.501599	7.58068	6.31726	4.4937e-06	0.000177585	4.28648	TLR6
4860551	-0.500976	8.73549	-6.82495	1.58208e-06	7.93273e-05	5.32139	METAP2
4040497	-0.500775	8.28773	-5.11723	6.02398e-05	0.00137372	1.71279	XAB1
1090669	-0.500586	7.60966	-3.90162	0.000951094	0.0128556	-1.00355	SLC2A8
4060121	-0.500533	9.50894	-7.73175	2.67242e-07	2.25889e-05	7.07989	UROD
4760095	0.500477	7.52119	2.93281	0.00850543	0.0791634	-3.11529	GNAQ
2120719	0.500323	7.8705	3.71876	0.00144515	0.0182091	-1.41121	CASP8
5490634	-0.50006	7.50979	-4.56006	0.000211301	0.00380394	0.472881	TCEA3
990093	0.500025	9.29472	5.56454	2.24511e-05	0.000615471	2.69076	HRIHFB2122
3460152	-0.499932	9.76787	-4.32328	0.000362406	0.00583136	-0.0581646	DDOST
5220240	-0.499747	7.95948	-3.04985	0.00656196	0.0642175	-2.86889	HRASLS3
3440678	-0.499497	10.1424	-4.39425	0.000308212	0.00514077	0.101124	CIB1
6660253	-0.499334	8.49742	-7.64582	3.14797e-07	2.5136e-05	6.91828	MRPL34
3370639	-0.499186	8.64461	-4.98056	8.17641e-05	0.00175445	1.41049	MRPL20
380307	0.499047	8.32152	1.32374	0.201212	0.650407	-5.92579	ACTR3
5890307	0.498646	14.628	6.34654	4.22723e-06	0.000168975	4.34711	H3F3A
6620465	-0.498605	13.3461	-5.9672	9.41308e-06	0.000315413	3.55296	RPL5
1570164	0.49836	9.5753	7.49206	4.23027e-07	3.13008e-05	6.62648	UNC119
4610019	0.498337	9.1668	4.62884	0.000180757	0.00334112	0.626831	ZYG11B
7320594	-0.498314	8.23766	-5.28943	4.10958e-05	0.00100595	2.09152	MAP3K4
4780008	-0.498252	8.16506	-2.82238	0.0108407	0.0960797	-3.34449	IGFBP7
4260070	0.498104	10.7797	3.30059	0.00373969	0.0404429	-2.33084	CDKN2D
1340491	0.498083	9.39132	2.7878	0.0116906	0.101981	-3.41554	YRDC
7050075	-0.497833	9.63444	-4.24585	0.00043254	0.0067689	-0.231968	NT5C
5490241	0.497678	9.37495	7.66638	3.02669e-07	2.45466e-05	6.95706	KIAA0913
840021	0.49765	7.25217	3.90485	0.000944077	0.012775	-0.996319	RFX2
5050372	0.497449	8.28486	1.65862	0.113522	0.495861	-5.46203	FLI1
990687	-0.497314	8.01111	-4.70925	0.000150655	0.00288559	0.806576	MRPL1
6980520	-0.497084	7.57373	-6.45231	3.39281e-06	0.00014359	4.56518	LOC652500
2710458	0.496938	7.44621	8.95275	2.89562e-08	5.08949e-06	9.26343	C9orf66
7200193	0.496701	7.06785	6.94316	1.24686e-06	6.60111e-05	5.55724	C19orf35
2630358	-0.496575	11.7579	-2.24281	0.0369619	0.246685	-4.47953	ALS2CR2
5960301	-0.49635	9.32287	-8.99621	2.68476e-08	4.83522e-06	9.33735	C21orf33
2850725	0.496247	7.26017	5.00665	7.71224e-05	0.00167553	1.4683	ZFYVE16
5260397	0.49623	12.3227	4.72684	0.000144775	0.0027993	0.845876	KLF6
3460066	0.49618	7.00489	5.04124	7.13776e-05	0.00157675	1.54489	LOC642788
5700722	-0.495965	9.24975	-4.82998	0.0001147	0.0023234	1.07586	ZNF364
6770594	0.495956	7.81426	6.23444	5.34517e-06	0.000204752	4.11436	CD82
6250129	0.495802	11.4332	6.39458	3.82473e-06	0.000156089	4.44634	DHRS7
7100674	0.495764	8.29726	7.20294	7.4377e-07	4.54923e-05	6.06862	GNG5
4150440	0.495629	7.33757	3.46074	0.00260207	0.0298297	-1.98131	OSBPL11
2760064	0.49541	7.14113	4.48039	0.000253283	0.00438847	0.294328	DNAJC3
4540041	0.495097	11.1461	4.85655	0.000108036	0.00220728	1.13501	FCGRT
6620674	0.495075	7.87133	7.94317	1.79364e-07	1.73612e-05	7.47301	HTATIP2
6250670	0.495034	8.67022	3.11387	0.00568873	0.0571538	-2.73273	SNN
3180437	-0.49491	12.3266	-2.005	0.0593418	0.339145	-4.90283	GLRX5
3840161	0.494355	7.05255	4.60982	0.000188728	0.00345825	0.584271	NHS
3460477	0.494309	7.86723	1.37913	0.183788	0.624353	-5.85485	RETN
2340445	0.493869	9.12628	3.25848	0.0041122	0.0439541	-2.42205	GNA13
1430470	0.493825	7.7036	8.60031	5.39238e-08	7.72173e-06	8.65451	FMNL1
6560327	0.493637	7.74494	2.22588	0.0382545	0.252371	-4.51061	CHD1
3990451	-0.493422	9.08721	-4.51497	0.000234115	0.0041179	0.371847	COMMD1
7380274	-0.492879	8.88962	-6.38798	3.87764e-06	0.000157588	4.43272	ZMYM6
2030674	0.492848	8.05544	5.42258	3.0639e-05	0.000789689	2.3825	ZDHHC17
5690431	-0.492821	10.3604	-4.76912	0.000131583	0.00258843	0.940215	DNAJC8
4890544	-0.492714	7.52832	-3.82636	0.00112988	0.0148797	-1.17159	RAB11FIP5
1440646	0.492688	9.66592	4.30312	0.00037948	0.00605206	-0.103411	IDS
4640110	0.492623	10.5151	4.02646	0.000714606	0.0101791	-0.724121	UBE2D3
7050372	0.492593	8.30749	5.86494	1.17166e-05	0.000372113	3.33578	TXNRD1
5720243	-0.492514	10.8814	-2.61363	0.0170318	0.137357	-3.76769	CFD
5260239	-0.492378	8.7477	-3.93329	0.000884555	0.0120973	-0.93272	XBP1
3130564	-0.49226	7.31235	-5.8632	1.17605e-05	0.000373018	3.33208	NCALD
2760609	0.492212	9.08081	4.50468	0.000239659	0.00419283	0.348788	MAP1LC3B
2070131	-0.492204	8.18086	-9.48374	1.16802e-08	3.09922e-06	10.1491	MRPL9
6660544	0.492097	10.8169	4.62563	0.000182079	0.00335918	0.619643	PJA2
7610564	0.492067	7.72567	2.23316	0.0376938	0.250061	-4.49726	PICALM
50164	-0.492035	8.79483	-5.56059	2.26456e-05	0.000620104	2.68221	NUP93
4060056	0.491962	7.79313	8.34508	8.54307e-08	1.03708e-05	8.20283	KIAA0701
4180170	-0.491929	11.8199	-3.96733	0.000818233	0.0113303	-0.85656	UBXD1
2650070	-0.491853	8.83018	-4.06479	0.000654562	0.00947908	-0.638212	MRPL37
1440296	-0.491352	7.809	-2.04164	0.0552439	0.323879	-4.83955	HLA-DQB1
6290553	0.491337	9.87546	6.01465	8.50764e-06	0.000292522	3.65329	March 7
1470019	0.491226	11.3673	4.17131	0.000512941	0.00777508	-0.399278	FGR
5420360	-0.491092	9.77162	-5.91334	1.05617e-05	0.00034373	3.43873	TMEM9B
2260010	-0.491015	7.90714	-7.0847	9.39873e-07	5.43257e-05	5.83707	POMGNT1
2060008	0.491001	9.56409	3.1895	0.00480229	0.0498633	-2.57077	DEGS1
2760148	-0.490682	8.47438	-5.92931	1.02068e-05	0.000335091	3.47264	WDR75
6250066	-0.490278	10.4129	-3.13893	0.00537872	0.0547606	-2.67921	DNAJB2
6660292	-0.490239	9.18119	-6.68787	2.09015e-06	9.87991e-05	5.04543	PSMC2
3440390	-0.490173	12.3407	-2.04383	0.0550062	0.323221	-4.83573	LOC646433
6350167	0.490054	10.137	4.28678	0.000393913	0.00624125	-0.140089	C15orf39
1660709	-0.489861	10.6833	-8.91681	3.08295e-08	5.34163e-06	9.20212	C20orf30
240703	0.489705	7.12786	5.10171	6.23609e-05	0.00140955	1.67854	TFEB
830390	0.489477	9.13203	5.08765	6.43484e-05	0.00144441	1.64748	UBAP1
4490563	0.489416	9.038	6.24458	5.23256e-06	0.000201065	4.13548	C20orf177
4390682	-0.489258	10.6474	-5.57139	2.2118e-05	0.000611312	2.70558	ATP5H
5340246	-0.489215	9.60506	-3.59486	0.00191757	0.023201	-1.68587	CD9
1050253	0.489141	9.91225	5.06425	6.7799e-05	0.00150796	1.59579	CCDC28A
2570139	-0.489089	8.52354	-5.31598	3.87535e-05	0.000959222	2.14966	SFRS7
3390110	-0.489067	13.0933	-8.71877	4.36779e-08	6.79407e-06	8.86108	LOC650276
6770246	-0.48869	13.566	-6.06272	7.68127e-06	0.000271195	3.75466	EEF1A1
2630719	-0.488422	9.05534	-4.89401	9.93017e-05	0.00205907	1.21833	MLLT6
1470392	-0.488264	9.07909	-5.71099	1.63292e-05	0.000482707	3.00651	FYN
7320484	-0.488182	8.73878	-5.38185	3.35122e-05	0.00084671	2.29366	SPTAN1
2900711	-0.488075	11.4945	-6.834	1.55342e-06	7.81314e-05	5.33951	EIF4A2
1170037	0.488044	7.82739	4.42524	0.00028719	0.00485645	0.170639	RAB2
3610092	0.488026	9.32539	3.86303	0.00103894	0.0138714	-1.08976	SYF2
1050544	-0.487881	9.04835	-7.06713	9.733e-07	5.53587e-05	5.80247	AKR7A2
5050561	-0.487531	8.72445	-6.97316	1.17411e-06	6.28173e-05	5.61678	SGPP1
3520128	0.487316	9.5238	5.31733	3.86376e-05	0.00095684	2.15263	ZNF586
6420612	-0.487245	8.53665	-6.34857	4.20933e-06	0.000168536	4.35131	MRPL17
6130717	-0.486746	8.33858	-4.58296	0.000200592	0.00364139	0.524156	PHPT1
3990181	-0.486676	8.16867	-5.13631	5.77312e-05	0.00132583	1.7549	POLR1C
3360400	-0.486467	8.40849	-2.65087	0.0157241	0.129143	-3.69324	C19orf10
1240136	-0.486228	6.75846	-4.30857	0.000374789	0.00599453	-0.0911863	OLIG2
3180392	-0.485946	7.49527	-5.38477	3.32974e-05	0.000844348	2.30003	CLYBL
4560348	-0.485733	8.4875	-4.4065	0.000299724	0.00502849	0.128599	DOK2
780168	0.485722	9.09545	5.09702	6.30164e-05	0.00142106	1.66819	MPPE1
6580152	0.485555	9.54551	2.91723	0.00880284	0.0813999	-3.14783	LRRFIP1
5090047	-0.485437	8.03665	-4.78298	0.000127528	0.00252603	0.971127	ACSS1
2810132	-0.485329	7.97959	-4.26454	0.000414451	0.00652388	-0.190014	SARS2
2940044	-0.485235	8.15154	-6.39838	3.79464e-06	0.000155225	4.45418	USP5
670079	0.485091	8.05512	5.38201	3.35002e-05	0.00084671	2.29401	TMEM127
1410280	0.485073	8.10482	9.00538	2.64235e-08	4.81829e-06	9.35291	STX6
7380671	-0.484985	9.70461	-5.69357	1.69575e-05	0.000497184	2.96906	CKAP1
5220600	0.484958	9.38229	4.16378	0.000521848	0.00788554	-0.416163	C20orf18
3850669	0.484813	7.5559	5.64976	1.86488e-05	0.000537887	2.87477	LXN
2680064	0.48474	8.69965	6.68439	2.10503e-06	9.93096e-05	5.0384	USP9X
450750	-0.484701	7.27249	-4.58656	0.00019896	0.00361797	0.532207	PDZD4
4060576	0.484578	10.9942	4.95511	8.65669e-05	0.00183806	1.35403	PRKCD
940373	0.48442	8.91863	3.52446	0.00225114	0.0264233	-1.84123	COL4A3BP
2070376	0.484239	7.04696	2.88176	0.00951752	0.0866292	-3.22166	LTF
4610075	-0.484195	8.41689	-3.49153	0.00242622	0.0280983	-1.91368	TFRC
3460368	-0.48414	7.43586	-5.22096	4.78276e-05	0.00114258	1.94125	RNF125
2600731	0.483984	8.43183	2.18313	0.0417044	0.269114	-4.58845	SLC38A2
1070088	-0.483843	8.66852	-4.8022	0.000122114	0.00243962	1.01398	FLAD1
5340110	-0.483719	7.56206	-6.14097	6.50842e-06	0.000238073	3.91903	CRYZ
1400598	0.483705	10.2486	5.20645	4.93941e-05	0.00117024	1.90934	PRKD2
510162	0.48357	7.44605	4.86329	0.000106408	0.0021795	1.15002	SNX13
6220070	0.483413	10.4544	4.90583	9.66975e-05	0.00201624	1.24461	MLKL
2480270	0.482991	7.94484	4.59875	0.000193531	0.00353429	0.559489	OS9
1400438	0.482809	7.39826	2.03623	0.0558317	0.326134	-4.84893	LOC339745
2900121	-0.482786	10.2896	-2.90065	0.00913018	0.083778	-3.18238	ARMET
4280129	-0.482456	8.2958	-5.86119	1.18112e-05	0.000373895	3.32781	C16orf24
3830500	-0.482221	7.68642	-4.89479	9.91273e-05	0.00205721	1.22007	KLHDC4
4290154	-0.482092	8.38395	-7.00165	1.10905e-06	6.03987e-05	5.67322	NOL6
6250280	-0.482082	9.50935	-4.76292	0.000133437	0.00261856	0.926397	CBFB
5570296	-0.482039	8.51736	-7.12181	8.73146e-07	5.13416e-05	5.90995	SSRP1
6660300	-0.482031	8.51351	-4.53908	0.000221621	0.00395559	0.425883	GLS
5820750	-0.481555	8.17629	-5.32179	3.82587e-05	0.000948904	2.1624	MRPS27
4260142	-0.481535	8.76757	-5.09783	6.29019e-05	0.00142046	1.66999	PEBP1
450603	-0.481229	10.3978	-4.45859	0.000266171	0.00457109	0.245458	CLCN7
2640309	0.48117	9.01011	5.43218	2.99996e-05	0.000775671	2.4034	FBXO33
6100743	-0.481158	8.22085	-5.06826	6.71942e-05	0.00149725	1.60466	ZFP90
3360551	0.481077	7.5635	5.13651	5.77058e-05	0.00132583	1.75534	FAM11B
5960333	0.48102	8.89635	3.86862	0.00102573	0.0137196	-1.07728	AOAH
2070241	-0.480957	8.16716	-4.82661	0.000115574	0.00233775	1.06836	C18orf17
520553	0.480876	7.30154	6.44577	3.43907e-06	0.00014522	4.55175	TNFRSF10C
6220136	-0.480875	13.4271	-3.65792	0.00166062	0.0205048	-1.54627	TMSB10
130113	-0.480865	8.11092	-4.53825	0.000222043	0.00395849	0.424009	SLC25A25
360187	0.480015	7.98524	7.02746	1.05335e-06	5.82955e-05	5.72423	ZCSL2
3120687	-0.479891	8.87739	-5.19081	5.11392e-05	0.00120514	1.87495	HCFC1
3840019	0.479655	11.1035	4.54859	0.000216884	0.00388643	0.447177	ARHGAP25
2140709	-0.479628	9.38182	-7.68659	2.91225e-07	2.39913e-05	6.99509	C12orf47
3130288	-0.479571	9.07136	-4.93327	9.0915e-05	0.00191122	1.30557	C1orf174
2510110	-0.479464	8.12187	-5.18739	5.15293e-05	0.0012114	1.86743	BZW2
6520689	-0.479128	7.68901	-4.32361	0.000362128	0.00583136	-0.0574095	NAPSB
4200541	0.478915	9.48676	3.67778	0.00158697	0.0197305	-1.50221	DKFZp762I137
7150594	0.478898	7.34586	3.49518	0.00240618	0.0278994	-1.90566	F12
1470669	0.478704	7.50106	6.75138	1.83658e-06	8.9478e-05	5.1736	ANKRD33
6400279	0.478698	10.1042	6.94296	1.24736e-06	6.60111e-05	5.55685	ATP6V0D1
3400075	-0.47842	8.01167	-7.74946	2.58405e-07	2.21107e-05	7.11306	TMEM103
6180044	-0.478253	7.12403	-2.05954	0.0533356	0.316638	-4.80836	DUSP2
4760364	-0.478248	7.42401	-2.86074	0.00996705	0.0899139	-3.26525	LGR6
5090368	-0.477953	7.51774	-3.9732	0.0008073	0.0112044	-0.84341	AXIN2
4010398	-0.477794	8.03011	-4.36661	0.00032827	0.00539949	0.0391037	LOC440341
6650730	0.477758	8.58229	7.71869	2.73958e-07	2.30138e-05	7.0554	TNPO3
3180070	-0.477612	8.2975	-8.64692	4.96223e-08	7.43372e-06	8.73602	AOF2
7610364	-0.477603	8.06293	-4.29906	0.000383016	0.00610206	-0.112524	APOBEC3G
4050398	-0.477243	11.1947	-4.51529	0.000233943	0.00411756	0.372568	SLC25A3
60411	0.477058	7.29195	2.52705	0.0204797	0.157975	-3.93883	F11R
3360307	-0.476993	8.42759	-5.73003	1.56701e-05	0.000466911	3.04737	LOC650982
2600348	-0.476733	10.1094	-1.15166	0.263672	0.720226	-6.13048	LOC647450
6660327	0.476581	7.24604	4.17288	0.000511099	0.00775199	-0.39575	HAL
6550438	-0.476516	10.3715	-5.25276	4.4571e-05	0.00107587	2.0111	SPCS1
4050523	0.476484	11.6664	6.90736	1.33985e-06	6.9545e-05	5.48601	SLC44A2
2260243	-0.476377	7.83035	-7.68291	2.93275e-07	2.40787e-05	6.98817	MRPL39
4760551	0.476048	12.213	5.1704	5.35137e-05	0.0012514	1.83001	ATP6V1B2
2640397	0.476003	7.43554	3.88651	0.000984569	0.0132456	-1.03731	PPM1D
3780220	-0.475897	8.46133	-6.11957	6.80961e-06	0.000247973	3.87415	PNPO
2810154	-0.47582	8.08938	-6.45278	3.38947e-06	0.00014359	4.56616	ACYP1
6660072	0.475643	7.63662	6.63048	2.35036e-06	0.000108364	4.92913	PPP1R10
6550739	0.475495	9.59471	2.50011	0.0216802	0.165368	-3.9915	CASP1
2060746	0.475405	9.51914	2.38468	0.027611	0.198655	-4.21396	GM2A
5290647	-0.475243	11.4858	-1.84424	0.0807143	0.408879	-5.17152	GSPT1
3460164	-0.475088	8.71799	-7.63069	3.24037e-07	2.56526e-05	6.88972	LOC653971
2810594	-0.474986	8.18559	-3.79631	0.00121032	0.0157096	-1.23861	PRDX4
6980767	-0.474981	9.01444	-4.92589	9.24356e-05	0.00193698	1.28917	NDUFA8
4760553	0.474887	7.21625	4.80999	0.000119988	0.002409	1.03133	UBE2B
4280253	0.474775	12.159	6.43189	3.53952e-06	0.000148331	4.5232	C9orf19
5270379	-0.474609	9.92396	-4.91417	9.4902e-05	0.00198475	1.26313	PSMC5
3870181	-0.474031	7.84337	-5.82337	1.28119e-05	0.000397559	3.24714	MRPS9
5360403	-0.473893	10.052	-1.69841	0.10566	0.475662	-5.40164	PIP5K2A
5490358	-0.473891	7.89282	-6.11096	6.93473e-06	0.000251027	3.85609	CDK6
3190382	0.473817	7.53099	2.37413	0.0282226	0.202129	-4.23402	STX7
540053	0.473772	7.77645	6.67978	2.12493e-06	9.99581e-05	5.02907	ATP11B
3180653	-0.473545	8.22816	-7.10694	8.99272e-07	5.24346e-05	5.88077	QIL1
4860195	-0.473192	8.56183	-3.42191	0.00284184	0.0321103	-2.06641	G6PC3
1990682	0.473079	8.4387	6.50754	3.0265e-06	0.000131917	4.67847	KIAA0556
5390725	-0.47289	9.33632	-4.68545	0.000158991	0.00300275	0.753421	SELS
4830563	-0.472718	8.39995	-6.87661	1.42541e-06	7.27452e-05	5.4247	LSM4
7330487	-0.472488	7.98281	-4.3979	0.00030566	0.00510841	0.109303	P2RY11
610082	0.47246	8.3692	5.81341	1.30893e-05	0.000404363	3.22589	GDI1
5270369	0.472233	7.51958	7.0191	1.07108e-06	5.88491e-05	5.70771	CNOT3
4390180	-0.472232	8.22964	-8.58155	5.57632e-08	7.91528e-06	8.62162	MGC12981
1410327	0.472215	7.819	6.92606	1.29041e-06	6.75549e-05	5.52325	RNF135
3610414	-0.471855	8.52165	-7.77695	2.45282e-07	2.14015e-05	7.16447	TMEM126A
520360	-0.471749	8.1925	-6.49497	3.10613e-06	0.000135025	4.65272	NPAL3
6250035	0.471735	11.1008	2.55944	0.0191191	0.150113	-3.87512	DKFZp727G131
2600286	-0.471585	9.97583	-5.30631	3.959e-05	0.000978104	2.12851	NAP1L4
270451	-0.471542	10.4315	-3.22	0.00448419	0.0471232	-2.50511	NDUFA4
7510551	0.47128	8.06076	3.78144	0.00125218	0.0161969	-1.27173	LOC644642
70041	0.470833	7.17665	2.97663	0.00772014	0.0730554	-3.02343	LOC649754
[truncated: 22,998 more rows]
