# Supplementary material for: Novel diagnostic biomarkers related to necroptosis and immune infiltration landscape in acute myocardial infarction
Source: PeerJ journal article supplement (doi:10.7717/peerj.17044), 2024-02-26
Supplement: qPCR_raw_data.xlsx [file qPCR_raw_data.xlsx]

## Sheet: Sheet1
Time	TNF	GAPDH	dCt (Ct gens-Ct GADPH)	2(Q)	mean 2(Q) Cont	relative	mean relative	stdv	ttest -DOX
Control	20.89	14.91	5.98	0.0158431	0.0148811	1.06465	1	0.0775117
	20.91	14.71	6.2	0.0136024		0.914071
	20.89	14.85	6.04	0.0151977		1.02128
Hypoxia	20.98	16.27	4.71	0.0382075	0.0539718	2.56752	3.62688	0.917538	0.00781011
	20.84	16.83	4.01	0.0620683		4.17096
	20.08	16.06	4.02	0.0616395		4.14215
Time	IL1B	GAPDH	dCt (Ct gens-Ct GADPH)	2(Q)	mean 2(Q) Cont	relative	mean relative	stdv	ttest -DOX
Control	21.02	15.16	5.86	0.0172173	0.0139561	1.23368	1	0.222093
	20.8	14.3	6.5	0.0110485		0.791667
	22.11	15.91	6.2	0.0136024		0.974656
Hypoxia	21.38	16.97	4.41	0.047039	0.0416771	3.37051	2.98631	0.792638	0.0139243
	21.79	16.68	5.11	0.0289559		2.07479
	21	16.65	4.35	0.0490365		3.51364
Time	TNFAIP3	GAPDH	dCt (Ct gens-Ct GADPH)	2(Q)	mean 2(Q) Cont	relative	mean relative	stdv	ttest -DOX
Control	19.25	14.67	4.58	0.0418102	0.0445446	0.938615	1	0.0532809
	20.08	15.63	4.45	0.0457527		1.02712
	20.22	15.78	4.44	0.0460709		1.03426
Hypoxia	18.71	14.6	4.11	0.0579118	0.058862	1.30008	1.32142	0.0230889	0.000661511
	19.6	15.51	4.09	0.0587202		1.31823
	19.66	15.6	4.06	0.059954		1.34593
Time	TRAF5	GAPDH	dCt (Ct gens-Ct GADPH)	2(Q)	mean 2(Q) Cont	relative	mean relative	stdv	ttest -DOX
Control	19.71	14.9	4.81	0.0356489	0.0400764	0.889524	1	0.106823
	19.98	15.35	4.63	0.040386		1.00773
	20.26	15.76	4.5	0.0441942		1.10275
hy	20.17	14.51	5.66	0.0197774	0.0221125	0.493494	0.55176	0.189657	0.0234443
	19.95	14.92	5.03	0.0306069		0.763714
	20.83	14.86	5.97	0.0159533		0.398073
Time	NLRP3	GAPDH	dCt (Ct gens-Ct GADPH)	2(Q)	mean 2(Q) Cont	relative	mean relative	stdv	ttest -DOX
Control	25.93	15.19	10.74	0.000584706	0.000587503	0.995241	1	0.0212446
	26.47	15.71	10.76	0.000576657		0.981539
	26.85	16.15	10.7	0.000601145		1.02322
hy	24.45	15.08	9.37	0.00151129	0.00166111	2.5724	2.82741	0.220844	0.00014022
	24.88	15.71	9.17	0.00173602		2.95492
	25.87	16.7	9.17	0.00173602		2.95492
Time	TLR4	GAPDH	dCt (Ct gens-Ct GADPH)	2(Q)	mean 2(Q) Cont	relative	mean relative	stdv	ttest -DOX
Control	19.94	14.6	5.34	0.0246888	0.0293619	0.840845	1	0.141043
	19.74	14.8	4.94	0.0325771		1.1095
	19.84	14.82	5.02	0.0308198		1.04965
hy	18.78	14.72	4.06	0.059954	0.0614346	2.0419	2.09232	0.280692	0.00382902
	19.18	15.35	3.83	0.0703162		2.39481
	19.97	15.76	4.21	0.0540336		1.84026
